# Supplementary material for: Geochronological and geochemical effects of zircon chemical abrasion: insights from single-crystal stepwise dissolution experiments
Source: Copernicus journal article supplement (doi:10.5194/gchron-6-1-2024), 2024-01-09
Supplement: Supplementary file 1 [file gchron-6-1-2024-supplement.zip]

Archive with 5 entries (5 files):
- Table_S2.xlsx
- SupplementalFigures.pdf
- Table_S3.xlsx
- Table_S1.xls
- gchron-6-1-2024-supplement-title-page.pdf
