# Supplementary material for: Geochronological and geochemical effects of zircon chemical abrasion: insights from single-crystal stepwise dissolution experiments
Source: Copernicus journal article supplement (doi:10.5194/gchron-6-1-2024), 2024-01-09
Supplement: Supplementary file 1 [file gchron-6-1-2024-supplement.zip › gchron-6-1-2024-supplement-title-page.pdf]

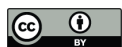

*Supplement of*

**Geochronological and geochemical effects of zircon chemical abrasion:  
insights from single-crystal stepwise dissolution experiments**

**Alyssa J. McKanna et al.**

*Correspondence to:* Alyssa J. McKanna (ajmckanna@gmail.com)

- gchron-6-1-2024-supplement-title-page.pdf
- SupplementalFigures.pdf
- Table\_S1.xls
- Table\_S2.xlsx
- Table\_S3.xlsx

The copyright of individual parts of the supplement might differ from the article licence.
