# Supplementary material for: Geochronological and geochemical effects of zircon chemical abrasion: insights from single-crystal stepwise dissolution experiments
Source: Copernicus journal article supplement (doi:10.5194/gchron-6-1-2024), 2024-01-09
Supplement: Supplementary file 1 [file gchron-6-1-2024-supplement.zip › SupplementalFigures.pdf]

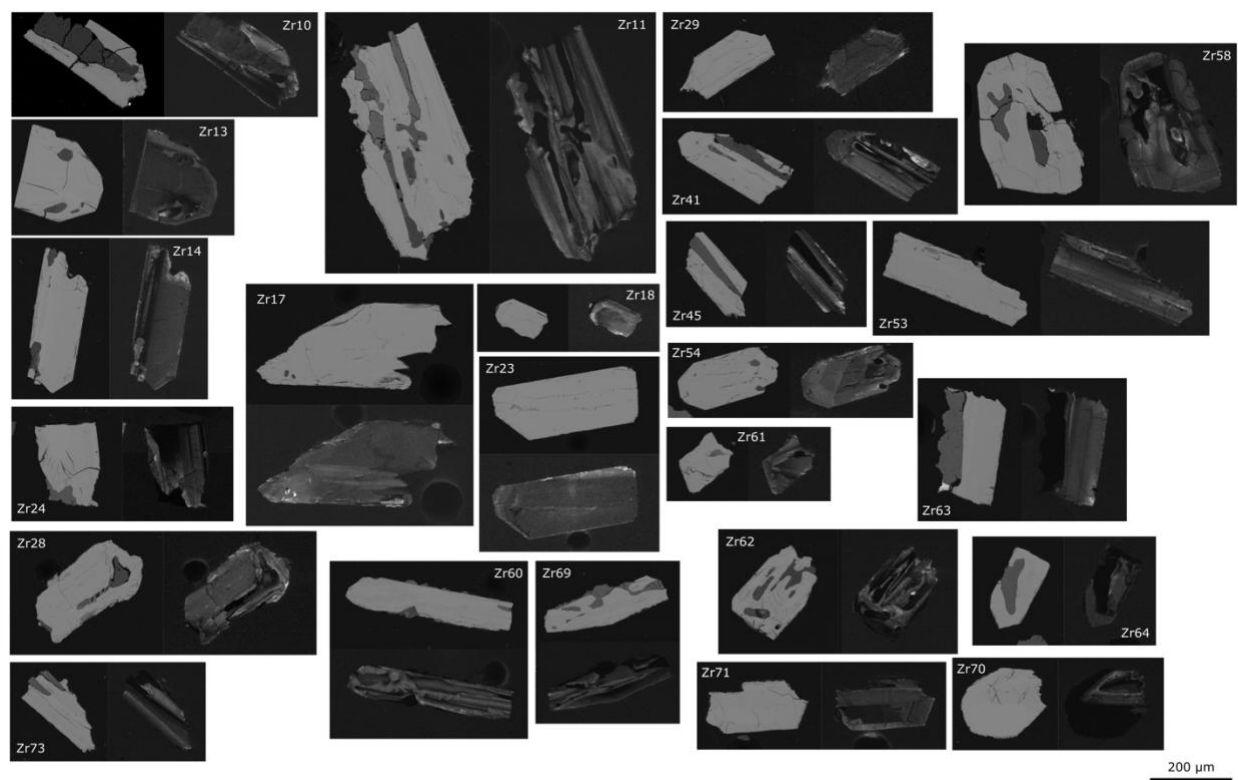

Figure S1. Backscattered electron (left) and cathodoluminescence (right) images of AS3 zircon.

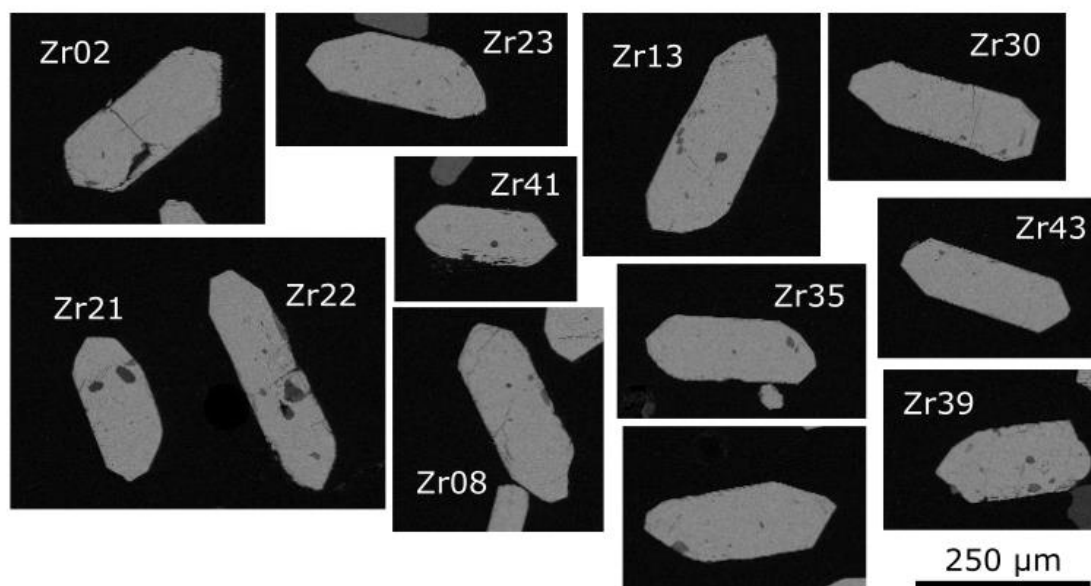

Figure S2. Backscattered electron images of SAM-47 zircon.

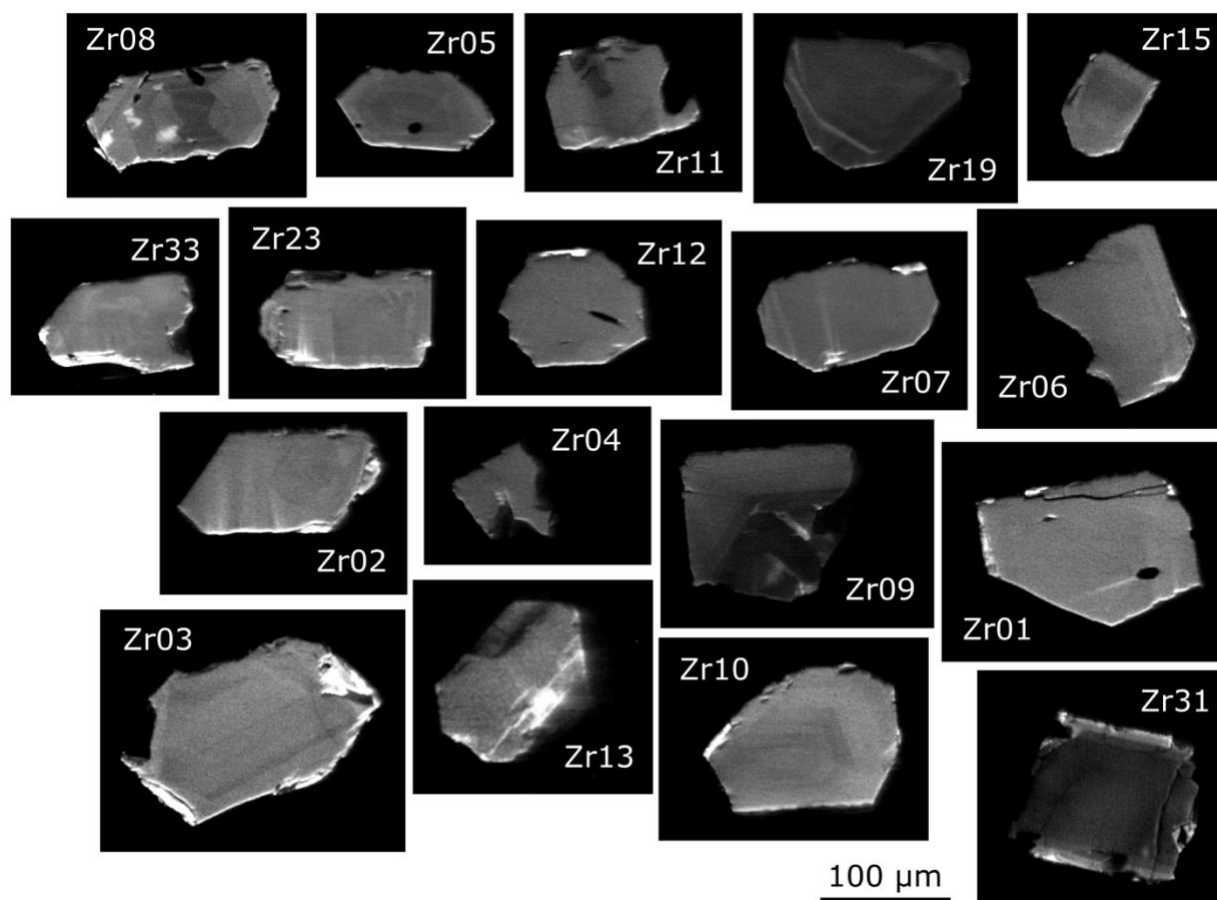

Figure S3. Cathodoluminescence images of KR18-04 zircon.

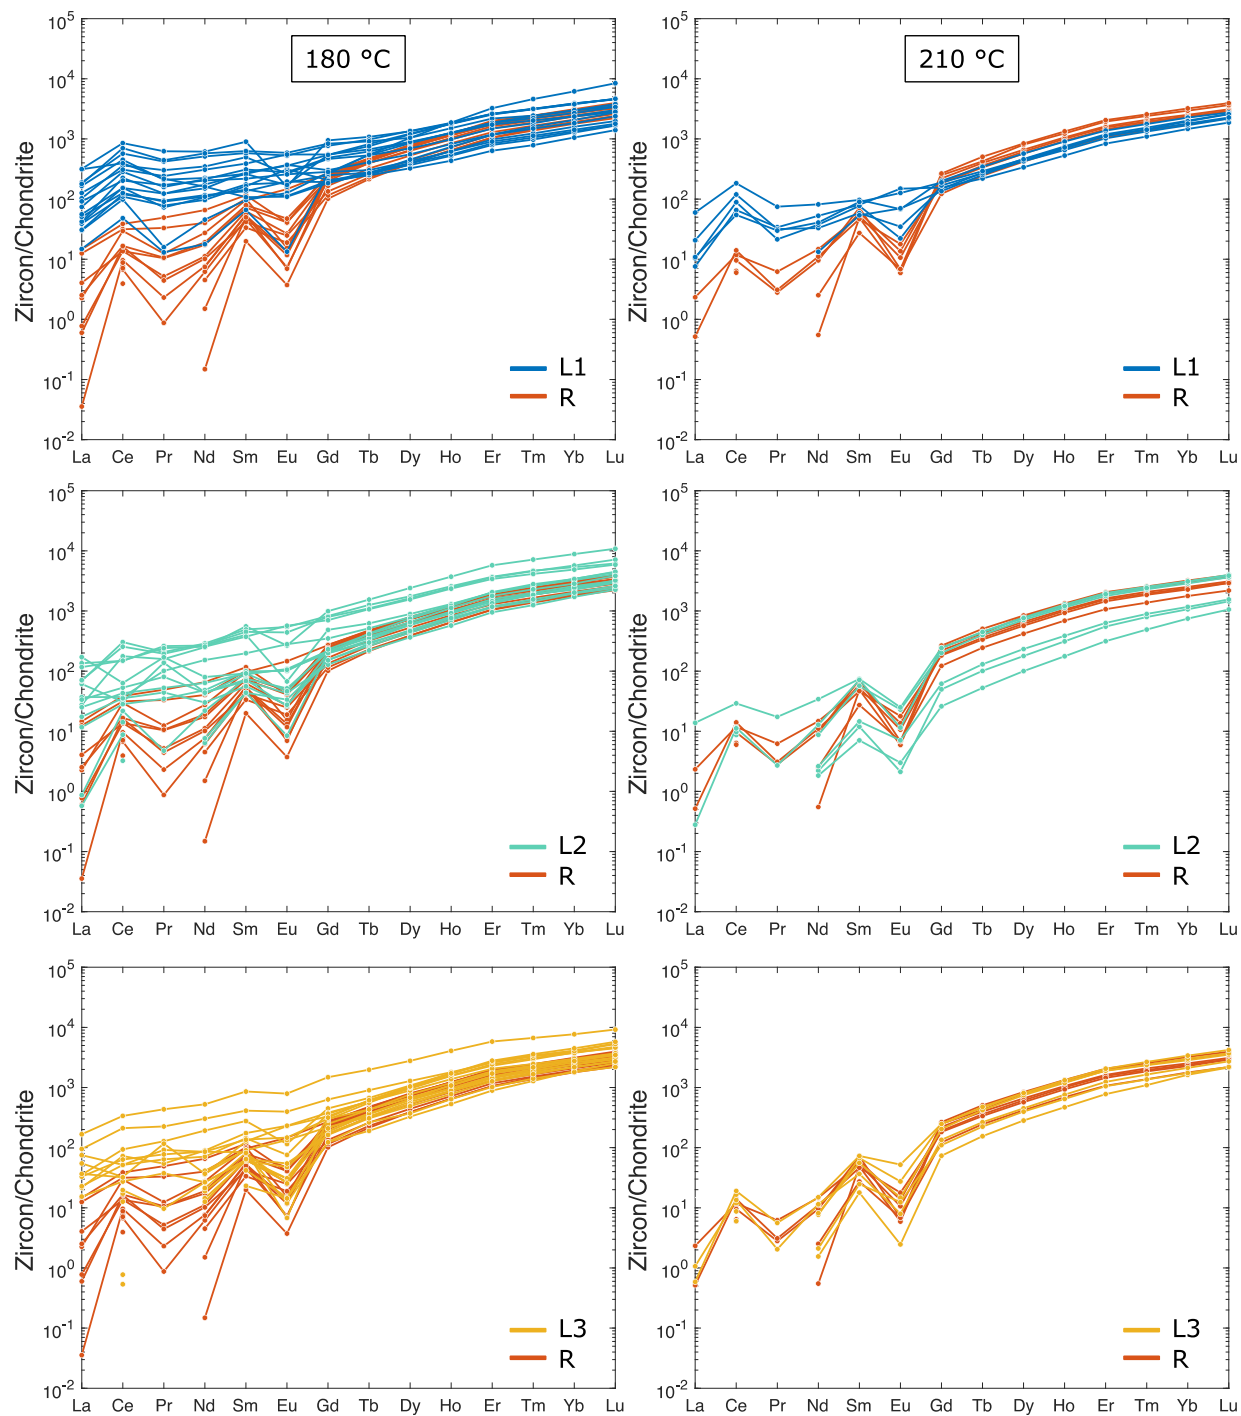

Figure S4. Chondrite-normalized REE spider diagrams for the 180 °C (left) and 210 °C (right) AS3 experiments comparing results for leachates and residues.

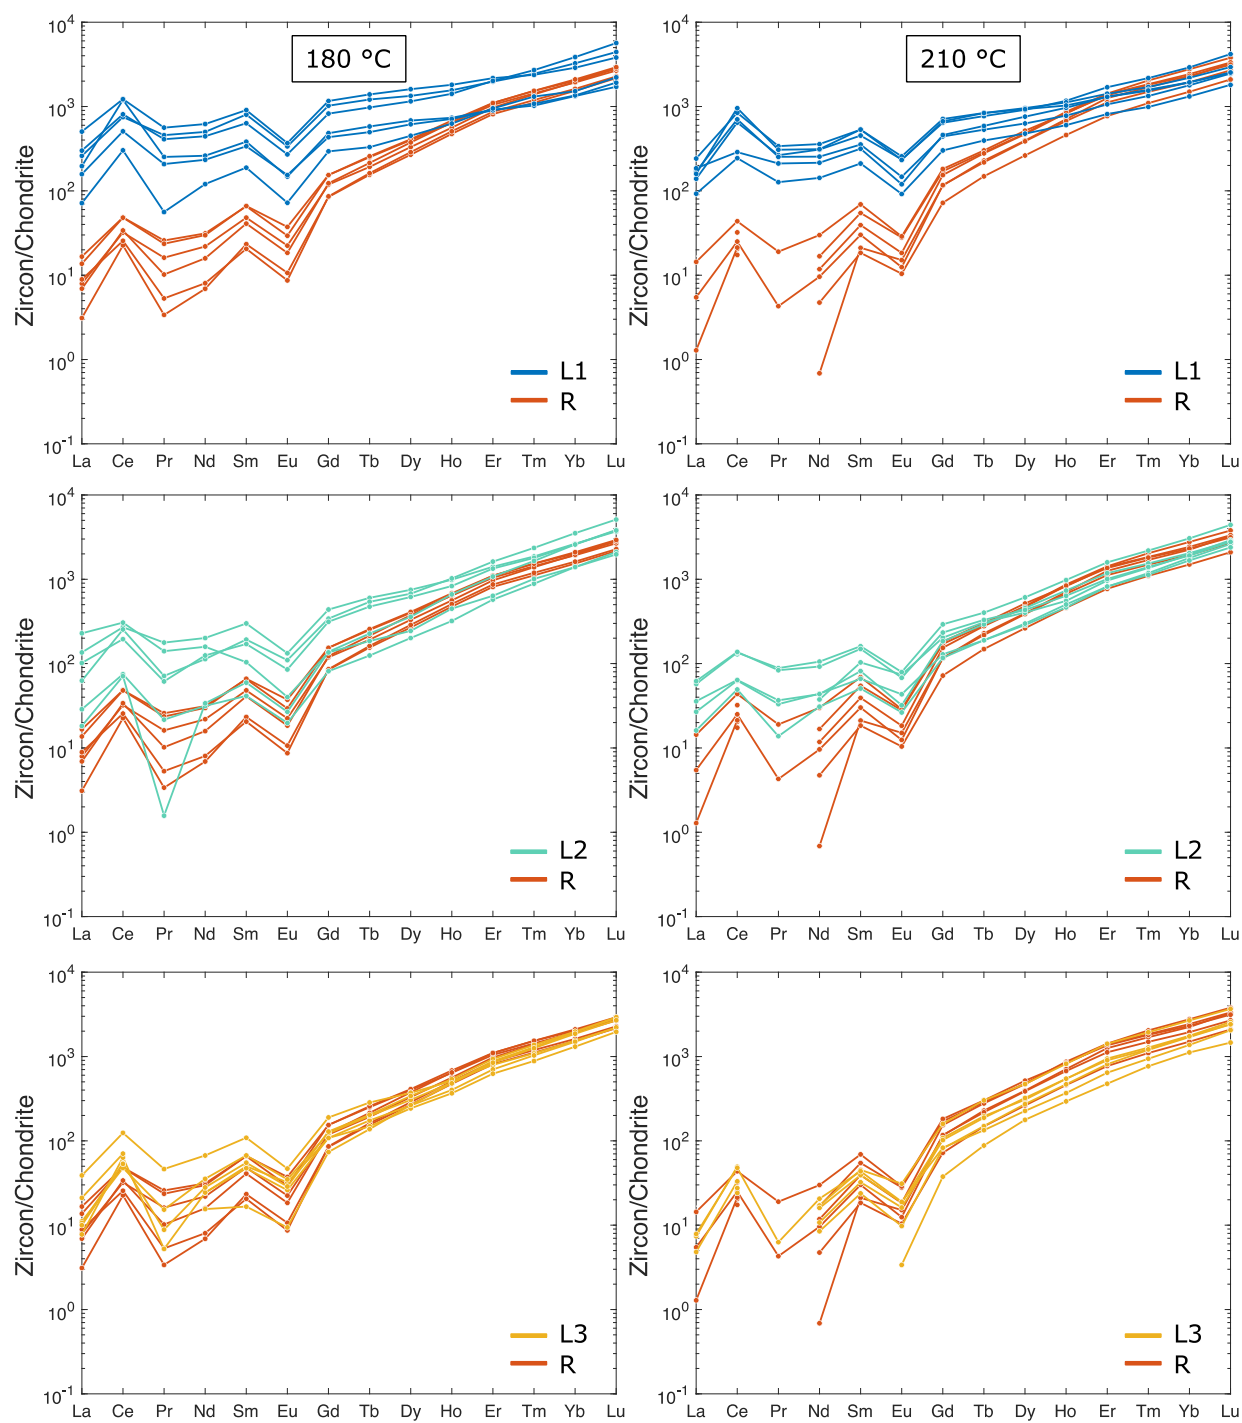

Figure S5. Chondrite-normalized REE spider diagrams for the 180 °C (left) and 210 °C (right) SAM-47 experiments comparing results for leachates and residues.

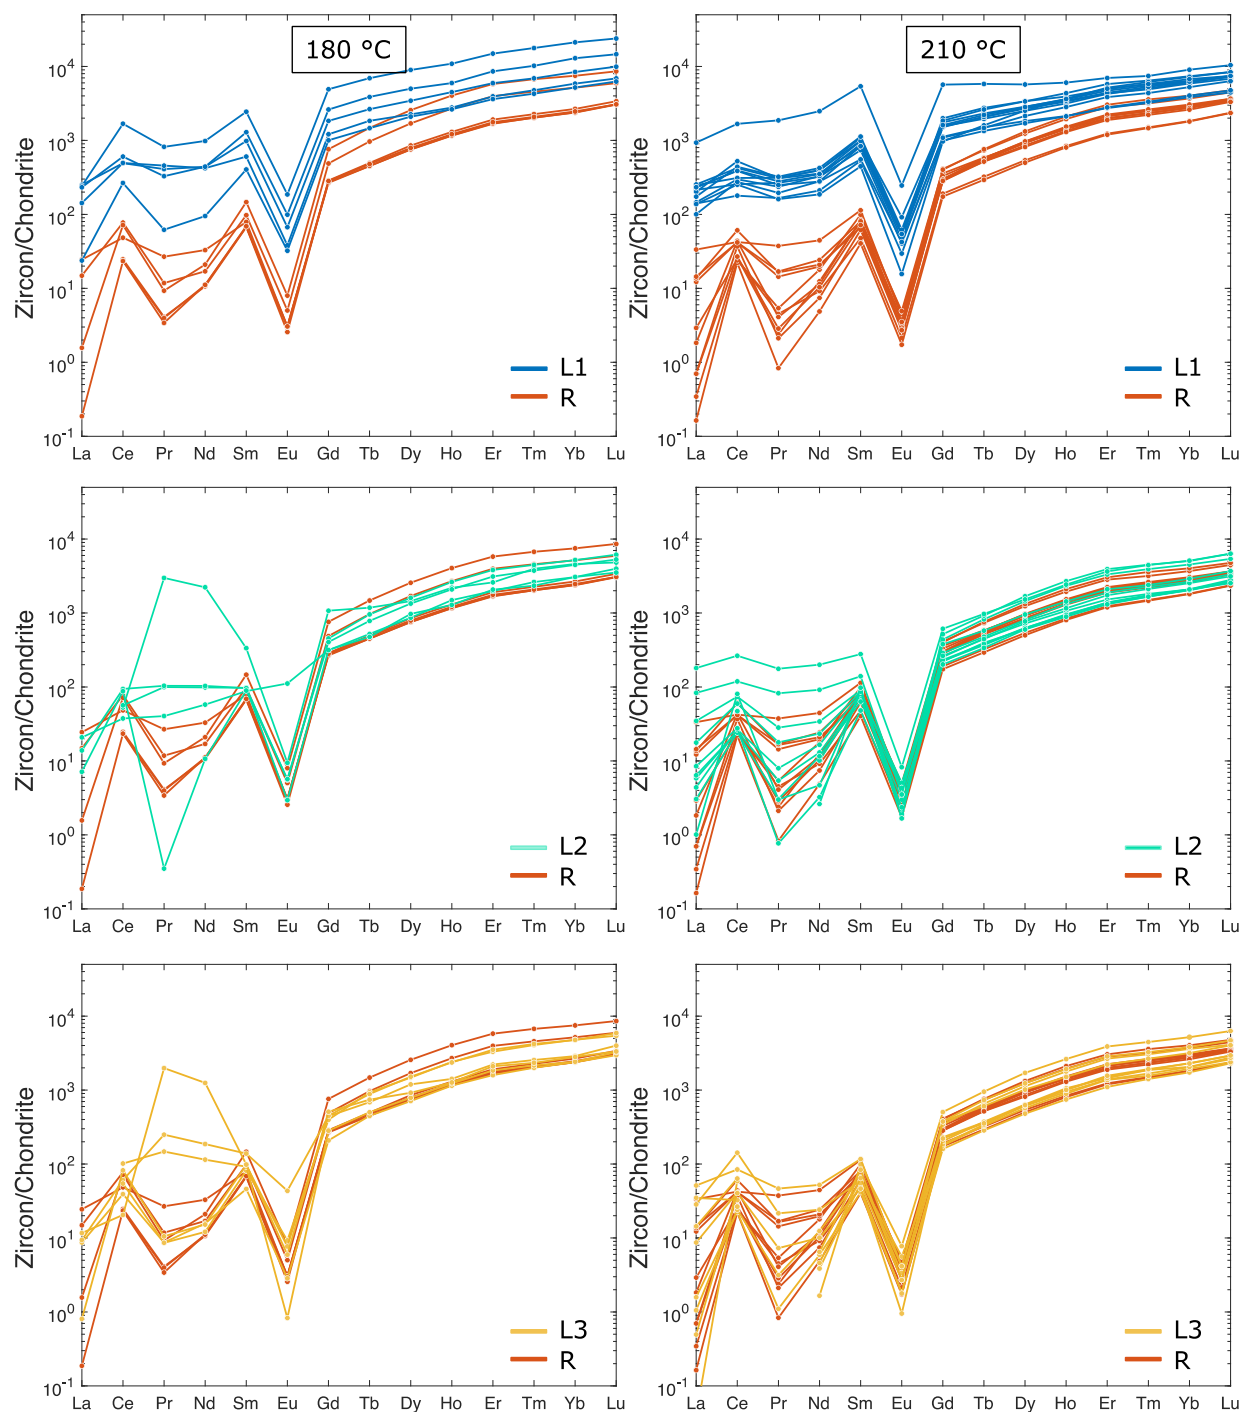

Figure S6. Chondrite-normalized REE spider diagrams for the 180 °C (left) and 210 °C (right) KR18-04 experiments comparing results for leachates and residues.
