# Supplementary material for: Geochronological and geochemical effects of zircon chemical abrasion: insights from single-crystal stepwise dissolution experiments
Source: Copernicus journal article supplement (doi:10.5194/gchron-6-1-2024), 2024-01-09
Supplement: Supplementary file 1 [file gchron-6-1-2024-supplement.zip › Table_S1.xls]

## Sheet: AS3
Table S1. AS3 ID-TIMS U-Pb isotopic results
	Dates (Ma)												Composition				Isotopic Ratios
			206Pb/						207Pb/
	206Pb/	±2σ	238U	±2σ	207Pb/	±2σ	207Pb/	±2σ	206Pb	±2σ	Corr.		Th/	Pb*	Pbc	Pb*/	206Pb/		207Pb/		207Pb/		206Pb/
Fraction	238U a	abs	<Th> b	abs	235U a	abs	206Pb a	abs	<Th> b	abs	coef.	% disc c	U d	(pg) e	(pg) f	Pbc g	238U h	±2σ %	235U h	±2σ %	206Pb h	±2σ %	204Pb i
180 °C Experiment
Zr10_L1	934.117	42.2705	934.206	42.268	812.388	348.535	491.972	1352.28	491.748	1352.34	0.244192	-89.872	0.21419	106.822	540.081	0.197789	0.15593	4.86096	1.22572	62.3298	0.057037	61.3242	31.7299
Zr11_L1	975.263	13.8541	975.341	13.8535	955.21	98.1705	909.303	319.995	909.125	320.006	0.25549	-7.25399	0.590534	831.103	1157.22	0.71819	0.163331	1.53072	1.56187	15.8585	0.0693857	15.5381	61.3424
Zr14_L1	1004.74	24.9648	1004.81	24.9636	965.615	178.623	877.583	582.031	877.412	582.049	0.248296	-14.489	0.603554	28.0984	69.9545	0.401667	0.168662	2.68337	1.58826	28.6678	0.0683278	28.1219	42.4671
Zr17_L1	1049.15	5.11782	1049.24	5.11754	1048.88	33.1618	1048.32	100.041	1048.14	100.045	0.255279	-0.0795157	0.192942	44.427	23.492	1.89115	0.176742	0.528576	1.80946	5.07086	0.0742852	4.96221	142.748
Zr18_L1	933.498	19.6402	933.584	19.6391	910.767	146.786	856.058	497.499	855.853	497.518	0.245771	-9.04613	0.322166	142.471	321.764	0.442779	0.155819	2.25995	1.45216	24.4113	0.0676221	23.9562	46.856
Zr23_L1	988.858	4.53437	988.933	4.53418	1007.11	29.9311	1047.04	92.421	1046.88	92.4238	0.257088	5.55694	0.688718	431.919	185.966	2.32257	0.165787	0.494614	1.69623	4.68561	0.0742381	4.58333	153.018
Zr24_L1	925.625	3.45951	925.703	3.45936	966.572	21.7614	1060.89	68.4763	1060.71	68.4786	0.272706	12.7503	0.61755	1001.58	327.274	3.06037	0.154408	0.401223	1.5907	3.49048	0.0747503	3.40288	198.6
Zr28_L1	776.246	61.0831	776.346	61.078	608.481	601.037	24.6126	3107.69	24.2836	3107.9	0.243737	-3053.85	-0.130939	20.1723	195.728	0.103063	0.127965	8.35232	0.820776	131.312	0.0465401	129.529	26.2496
Zr60_L1	856.909	4.99065	856.991	4.99039	908.227	35.7394	1035.16	117.698	1034.96	117.703	0.254771	17.2197	0.506865	256.91	145.896	1.76091	0.142168	0.621968	1.44603	5.95389	0.0738024	5.82647	125.08
Zr61_L1	1026.35	86.6652	1026.42	86.6618	859.006	692.685	448.534	2612.94	448.361	2613.03	0.243719	-128.822	0.717867	18.1091	151.525	0.119512	0.172586	9.13408	1.33029	119.501	0.0559285	117.608	25.5973
Zr62_L1	834.936	2.59045	835.017	2.59032	896.259	18.4241	1050.7	60.9264	1050.49	60.9287	0.267059	20.535	0.543047	1077.38	316.824	3.40056	0.138281	0.330783	1.41737	3.09468	0.0743728	3.02302	222.223
Zr63_L1	708.61	3.45481	708.693	3.45468	799.792	19.6327	1063.03	69.3834	1062.78	69.3866	0.260105	33.3405	0.516686	488.373	165.689	2.94753	0.116192	0.514835	1.19828	3.54712	0.0748298	3.44907	196.041
Zr64_L1	1054.1	6.2423	1054.18	6.24211	1048.41	27.1049	1036.57	81.0535	1036.39	81.056	0.280401	-1.6916	0.318434	533.421	217.763	2.44955	0.177646	0.641928	1.80815	4.14576	0.0738538	4.01321	174.195
Zr69_L1	1047.76	5.44055	1047.83	5.44032	1044.66	34.9545	1038.19	105.844	1038.04	105.847	0.255091	-0.921342	0.646044	442.414	219.232	2.01802	0.176488	0.562596	1.79781	5.35733	0.0739133	5.24202	136.686
Zr70_L1	1076.1	1.53742	1076.18	1.53738	1079.7	5.6699	1086.98	16.2589	1086.81	16.2594	0.353441	1.00084	0.423145	1752.18	143.388	12.2199	0.181671	0.155127	1.89603	0.852911	0.0757276	0.810523	772.972
Zr71_L1	1011.62	4.85476	1011.71	4.85451	1020.49	32.023	1039.56	98.2609	1039.38	98.2641	0.256489	2.68713	0.331522	624.994	311.342	2.00742	0.169912	0.518537	1.73199	4.97469	0.0739633	4.86746	145.645
Zr73_L1	1022.77	7.46862	1022.86	7.46824	1022.48	50.1057	1021.85	154.126	1021.67	154.131	0.251859	-0.0904794	0.372155	119.366	91.2847	1.30762	0.171937	0.789692	1.73735	7.775	0.0733181	7.61449	100.549
Zr10_L2	1131.46	2.05641	1131.54	2.05633	1114.99	11.1153	1083.01	31.9881	1082.86	31.989	0.296562	-4.47367	0.479836	29.2719	4.67058	6.26728	0.191863	0.198165	1.99845	1.64247	0.0755779	1.59464	400.223
Zr11_L2	1098.46	1.44508	1098.54	1.44504	1095.7	6.09447	1090.22	17.4481	1090.06	17.4486	0.341113	-0.755923	0.489996	137.403	11.8811	11.5649	0.185778	0.143081	1.94204	0.909278	0.0758503	0.870318	720.686
Zr13_L2	1080.88	3.86355	1080.95	3.86338	1078.42	24.1719	1073.48	71.43	1073.32	71.432	0.262217	-0.68929	0.529709	64.2026	22.5287	2.84981	0.182547	0.38825	1.8924	3.63853	0.0752197	3.55637	190.003
Zr14_L2	1045.98	1.11269	1046.06	1.11268	1062.58	2.93912	1096.83	8.09121	1096.67	8.09151	0.475316	4.63594	0.578444	17.4113	0.639264	27.2364	0.176164	0.115241	1.84762	0.446125	0.0761011	0.402972	1635.47
Zr17_L2	1092.51	1.18375	1092.6	1.18372	1093.9	3.04913	1096.65	8.28288	1096.48	8.28318	0.465641	0.37676	0.334108	18.5308	0.742349	24.9624	0.184684	0.117792	1.93681	0.455339	0.0760941	0.412568	1594.76
Zr23_L2	1094.03	1.43923	1094.11	1.4392	1093.23	6.2569	1091.63	17.9393	1091.47	17.9399	0.343883	-0.220488	0.614412	74.3482	6.40772	11.6029	0.184963	0.143031	1.93488	0.934686	0.0759035	0.895042	701.797
Zr24_L2	1168.74	3.94645	1168.81	3.94661	1132.88	12.0503	1064.8	41.3374	1064.66	41.3384	-0.746483	-9.76097	0.548937	45.0769	3.73286	12.0757	0.198775	0.369202	2.05176	1.76519	0.0748958	2.05527	742.038
Zr28_L2	1062.45	3.0033	1062.54	3.00315	1065.41	18.36	1071.45	54.5545	1071.28	54.5562	0.271614	0.840006	0.362947	15.8057	4.40685	3.58661	0.179173	0.306609	1.85555	2.78266	0.0751441	2.71527	243.556
Zr60_L2	1103.37	1.20562	1103.46	1.2056	1101.63	2.04207	1098.2	4.90277	1098.04	4.903	0.642059	-0.471353	0.374291	39.5439	0.892368	44.3134	0.186682	0.118884	1.95927	0.30376	0.0761531	0.242866	2787.81
Zr62_L2	1146.19	1.33043	1146.27	1.3304	1128.34	4.10934	1094.16	11.2776	1094.01	11.278	0.410414	-4.75457	0.46843	60.981	3.38274	18.0271	0.194589	0.126699	2.03815	0.603275	0.0759998	0.562323	1119.09
Zr63_L2	1141.37	1.24356	1141.45	1.24353	1123.91	5.0725	1090.31	14.2371	1090.16	14.2375	0.372152	-4.68287	0.504882	80.4414	5.63384	14.2782	0.193697	0.118883	2.02491	0.746275	0.0758537	0.709914	882.46
Zr64_L2	1093.51	0.977291	1093.59	0.977274	1094.4	2.19342	1096.17	5.60357	1096.01	5.6038	0.601928	0.24278	0.388944	62.7212	1.65724	37.8469	0.184867	0.0971664	1.93826	0.327469	0.0760759	0.278073	2374.9
Zr69_L2	1103.53	2.19523	1103.61	2.19514	1098.37	12.3862	1088.18	35.9747	1088.03	35.9757	0.288114	-1.41036	0.534875	70.3818	12.5133	5.62457	0.18671	0.216441	1.94979	1.84548	0.0757731	1.79484	356.338
Zr70_L2	1092.89	1.25872	1092.98	1.25868	1093.64	5.10995	1095.13	14.5361	1094.97	14.5365	0.371062	0.204105	0.396741	27.6686	2.02399	13.6703	0.184754	0.125212	1.93607	0.763189	0.0760364	0.725376	868.05
Zr71_L2	1105.53	1.00414	1105.61	1.00413	1102.79	2.69676	1097.38	7.18705	1097.23	7.18731	0.524041	-0.743142	0.542875	60.2942	2.0413	29.5371	0.187079	0.098839	1.96264	0.400913	0.0761219	0.357662	1788.14
Zr73_L2	1089.24	1.32287	1089.32	1.32283	1090.88	5.92915	1094.17	17.0204	1094.01	17.021	0.346794	0.450819	0.496813	26.9448	2.26612	11.8903	0.184082	0.131999	1.92811	0.886785	0.076	0.849457	739.085
Zr10_L3	1102.2	1.1206	1102.28	1.12058	1100.46	3.71797	1097.03	10.4904	1096.87	10.4907	0.357153	-0.47181	0.498216	10.4769	0.521769	20.0796	0.186466	0.110608	1.95586	0.553378	0.0761085	0.523157	1234.87
Zr11_L3	1096.39	0.902351	1096.47	0.902348	1096.45	1.50109	1096.58	3.24587	1096.43	3.24609	0.794296	0.0175817	0.502958	97.616	1.24348	78.5024	0.185397	0.0894992	1.94422	0.223873	0.0760916	0.158909	4767.88
Zr13_L3	1082.47	2.5565	1082.55	2.55639	1080.12	15.3469	1075.37	45.1879	1075.21	45.1893	0.277047	-0.660775	0.538346	53.6259	11.8927	4.50916	0.18284	0.256555	1.89723	2.30809	0.0752906	2.25032	289.2
Zr14_L3	1105.29	1.33511	1105.37	1.33509	1102.3	4.79504	1096.4	13.6073	1096.24	13.6077	0.338859	-0.811315	0.576076	15.9742	0.984884	16.2194	0.187035	0.131444	1.96121	0.713029	0.0760845	0.67906	982.47
Zr17_L3	1089.67	3.36881	1089.75	3.36872	1091.13	15.7317	1094.06	46.1147	1093.89	46.1161	0.217073	0.401373	0.348994	11.2646	2.6334	4.2776	0.184161	0.336024	1.92883	2.35259	0.0759958	2.3029	287.699
Zr18_L3	1128.41	1.27775	1128.49	1.27771	1117.21	4.75022	1095.48	13.2773	1095.33	13.2777	0.386784	-3.00573	0.468637	27.2167	1.78933	15.2106	0.191299	0.123434	2.00501	0.701155	0.0760497	0.662463	946.964
Zr23_L3	1095.38	1.12634	1095.45	1.12633	1095.6	3.57596	1096.05	9.89923	1095.9	9.89956	0.440862	0.0613088	0.60161	43.1395	1.97494	21.8435	0.18521	0.11181	1.94175	0.533551	0.0760714	0.493488	1308.58
Zr24_L3	1110	1.2538	1110.08	1.2538	1105.11	1.87843	1095.51	4.69054	1095.36	4.69073	0.554261	-1.32195	0.520084	19.5142	0.313554	62.2357	0.187901	0.122959	1.96943	0.278931	0.0760511	0.232067	3768.34
Zr28_L3	1098.07	1.80943	1098.15	1.80937	1094.85	9.48082	1088.45	27.5341	1088.29	27.5349	0.289477	-0.883442	0.482765	9.84298	1.34621	7.3116	0.185705	0.179216	1.93956	1.41513	0.0757833	1.37362	463.31
Zr60_L3	1104.49	3.55242	1104.57	3.55225	1097.7	21.6358	1084.26	63.1479	1084.1	63.1497	0.267513	-1.86602	0.3866	20.4169	6.61453	3.08668	0.186888	0.349973	1.94783	3.22474	0.075625	3.14905	210.998
Zr61_L3	1078.09	1.58819	1078.17	1.58815	1084.7	7.34334	1098	21.2201	1097.84	21.2207	0.326301	1.81275	0.522711	8.35138	0.873183	9.5643	0.182037	0.159977	1.91033	1.10179	0.0761454	1.05993	594.331
Zr62_L3	1141.56	2.49588	1141.64	2.49578	1123.24	13.8659	1087.97	39.8082	1087.82	39.8093	0.282934	-4.92578	0.445717	34.3074	6.9037	4.96943	0.193733	0.238567	2.02292	2.04063	0.0757652	1.98609	323.765
Zr63_L3	1114.24	1.73234	1114.32	1.73228	1105.6	8.66626	1088.64	24.9038	1088.49	24.9046	0.319969	-2.3511	0.540113	50.2823	6.1261	8.20788	0.188683	0.169296	1.97085	1.28656	0.0757906	1.24236	510.842
Zr64_L3	1093.91	0.991559	1093.99	0.99154	1095.52	2.78002	1098.73	7.47974	1098.57	7.48001	0.514134	0.438853	0.409719	43.1113	1.57021	27.4557	0.18494	0.0985522	1.94151	0.41481	0.0761732	0.37242	1718.82
Zr69_L3	1103.4	1.05249	1103.47	1.05249	1101.38	1.83033	1097.4	4.36132	1097.25	4.36154	0.662153	-0.546507	0.550022	48.7015	0.841379	57.8829	0.186686	0.103783	1.95853	0.272298	0.0761227	0.215511	3480.14
Zr70_L3	1097.22	1.87548	1097.3	1.8754	1095.41	9.90325	1091.82	28.7379	1091.66	28.7388	0.290663	-0.49459	0.443497	13.8755	1.93589	7.16752	0.185549	0.185889	1.94119	1.47776	0.0759109	1.43443	458.807
Zr71_L3	1104.78	1.35232	1104.86	1.35228	1100.2	6.33559	1091.15	18.1413	1091	18.1419	0.34625	-1.24905	0.553074	53.8235	4.77118	11.281	0.186941	0.133194	1.9551	0.943105	0.0758856	0.90507	692.884
Zr73_L3	1093.44	1.58818	1093.51	1.58812	1093.11	7.95949	1092.47	23.0092	1092.32	23.0099	0.31672	-0.0881046	0.518101	18.5952	2.11796	8.77976	0.184854	0.157913	1.93455	1.1891	0.0759357	1.14843	547.858
Zr10_R	1096.41	1.35192	1096.48	1.35192	1096.83	1.51928	1097.66	2.83844	1097.51	2.83866	0.809561	0.114557	0.519553	39.4132	0.256456	153.684	0.1854	0.134088	1.9453	0.226544	0.0761327	0.138096	9277.83
Zr11_R	1097.04	1.14636	1097.11	1.14636	1097.05	1.26183	1097.06	1.86053	1096.91	1.86079	0.927666	0.00249641	0.517011	533.762	0.93775	569.194	0.185516	0.11364	1.94593	0.188133	0.0761099	0.0871484	34333.9
Zr13_R	1094.27	1.32159	1094.34	1.32158	1095.77	1.45202	1098.74	2.47906	1098.59	2.4793	0.858119	0.40759	0.583942	546.202	3.83002	142.611	0.185006	0.131314	1.94222	0.216631	0.0761739	0.119598	8475.79
Zr14_R	1095.91	0.948489	1095.99	0.94849	1096.58	1.18025	1097.9	2.03207	1097.74	2.0323	0.89121	0.180656	0.50829	56.6145	0.160755	352.178	0.185309	0.0941128	1.94458	0.176012	0.0761417	0.0962518	21295.7
Zr17_R	1095.52	1.04358	1095.6	1.04358	1096.02	1.22253	1097.02	1.91629	1096.86	1.91655	0.921643	0.135948	0.54013	219.152	0.536816	408.245	0.185238	0.103582	1.94297	0.182369	0.0761081	0.0901134	24490.7
Zr18_R	1105.98	1.09437	1106.06	1.09436	1103.19	1.82927	1097.69	4.27414	1097.53	4.27436	0.68148	-0.755241	0.461422	85.8093	1.61141	53.2511	0.187161	0.107681	1.96381	0.271893	0.0761337	0.211115	3273.83
Zr23_R	1096.6	0.979268	1096.67	0.979273	1097.49	1.19575	1099.25	1.85804	1099.1	1.85833	0.940998	0.241194	0.586596	401.076	0.774302	517.984	0.185435	0.0971112	1.94721	0.178241	0.0761931	0.087048	30716.7
Zr24_R	1091.02	0.915336	1091.1	0.915335	1092.97	1.3976	1096.86	2.86806	1096.7	2.86829	0.824004	0.532699	0.514129	40.2321	0.365	110.225	0.184409	0.0911973	1.93413	0.208808	0.0761022	0.139599	6668.31
Zr28_R	1096.46	0.927549	1096.54	0.927552	1096.94	1.31244	1097.9	2.4851	1097.75	2.48534	0.870319	0.131124	0.561006	74.8086	0.561525	133.224	0.18541	0.0919929	1.94564	0.195689	0.0761418	0.119895	7963.78
Zr63_R	1110.87	0.961342	1110.95	0.96135	1105.54	1.28792	1095.08	2.29338	1094.93	2.29364	0.896874	-1.44218	0.612316	861.672	5.6185	153.363	0.188062	0.09421	1.97069	0.191205	0.0760342	0.109891	9053.39
Zr64_R	1095.01	0.91567	1095.09	0.915664	1095.55	1.17208	1096.64	1.85809	1096.48	1.85832	0.950657	0.148783	0.423252	186.271	0.257219	724.172	0.185142	0.0909255	1.9416	0.174884	0.0760935	0.0870118	44712.6
Zr71_R	1097.25	1.03685	1097.33	1.03685	1096.9	1.23245	1096.19	1.93212	1096.04	1.93239	0.927028	-0.096847	0.581655	444.445	1.35974	326.861	0.185555	0.102765	1.9455	0.183768	0.0760764	0.0909409	19415
Zr73_R	1098.21	1.63633	1098.29	1.63635	1095.52	1.13802	1090.18	5.04611	1090.02	5.04605	-0.151643	-0.7364	0.515007	113.397	1.58909	71.3597	0.185731	0.162053	1.9415	0.169806	0.0758484	0.249787	4323.81
210 °C Experiment
Zr29_L1	1017.71	4.03571	1017.78	4.03553	1032.47	26.4484	1063.88	80.3185	1063.72	80.3209	0.254922	4.34053	0.56219	263.522	102.871	2.56168	0.171016	0.428675	1.76442	4.08104	0.0748616	3.99321	171.423
Zr41_L1	1058.2	6.44366	1058.28	6.44339	1050.69	41.8183	1035.12	126.375	1034.96	126.378	0.249881	-2.22989	0.59055	177.06	106.121	1.66848	0.178395	0.660272	1.81447	6.38827	0.0738008	6.25595	117.574
Zr45_L1	1019.68	2.85932	1019.76	2.8592	1034.04	18.3965	1064.54	55.7566	1064.37	55.7583	0.261259	4.21359	0.535796	287.523	78.4015	3.66732	0.171375	0.303175	1.7687	2.83614	0.074886	2.77223	238.796
Zr49_L1	1001.41	7.03099	1001.49	7.03064	1007.01	47.9378	1019.2	148.877	1019.02	148.881	0.249881	1.74551	0.436605	28.8828	20.9699	1.37735	0.16806	0.758053	1.69595	7.50493	0.0732223	7.35217	103.503
Zr53_L1	1031.28	1.9168	1031.36	1.91672	1045.8	11.299	1076.26	33.8403	1076.09	33.8413	0.279205	4.17842	0.529888	163.87	27.282	6.00654	0.173485	0.201128	1.80095	1.73067	0.0753239	1.68531	379.66
Zr54_L1	1029.15	20.3911	1029.23	20.3898	905.756	129.117	615.757	440.477	615.58	440.494	0.570928	-67.1357	0.560981	150.512	161.807	0.930194	0.173097	2.14372	1.44009	21.5461	0.0603663	20.3983	74.7881
Zr58_L1	1005.62	4.41801	1005.7	4.41782	1019.9	28.5251	1050.69	87.4085	1050.52	87.4113	0.252702	4.28967	0.508394	1660.88	709.2	2.3419	0.168823	0.47449	1.73041	4.43278	0.0743727	4.33712	160.228
Zr29_L2	1086.15	0.9945	1086.23	0.994501	1089.99	1.81263	1097.66	4.30733	1097.51	4.30756	0.688077	1.04858	0.580046	48.2596	0.87808	54.9604	0.183515	0.099492	1.92552	0.271227	0.0761326	0.212747	3280.91
Zr41_L2	1093.45	1.08151	1093.53	1.08151	1095.33	1.27638	1099.06	2.06961	1098.91	2.06985	0.906707	0.51068	0.508903	133.032	0.485104	274.234	0.184856	0.107534	1.94095	0.190469	0.076186	0.0981517	16583.3
Zr45_L2	1101.38	1.23588	1101.46	1.23587	1100.21	1.69946	1097.9	3.67378	1097.75	3.674	0.731757	-0.316699	0.501012	50.7852	0.727645	69.794	0.186314	0.122071	1.95513	0.252978	0.0761418	0.180659	4243.05
Zr53_L2	1098.43	0.948954	1098.5	0.948958	1097.77	1.22688	1096.47	2.11547	1096.31	2.11572	0.904877	-0.17861	0.559555	121.926	0.508387	239.828	0.185771	0.0939614	1.94803	0.182855	0.0760873	0.100522	14327.3
Zr54_L2	1092.86	1.04653	1092.94	1.04653	1094.77	1.47011	1098.57	3.14145	1098.42	3.14167	0.751642	0.519438	0.55173	78.2098	0.881291	88.7445	0.184749	0.104107	1.93935	0.219439	0.0761673	0.153568	5322.9
Zr58_L2	1091.82	1.14394	1091.9	1.14393	1093.69	1.28292	1097.41	1.9932	1097.25	1.99345	0.91108	0.508979	0.521438	423.415	1.27135	333.044	0.184557	0.113896	1.93621	0.191604	0.076123	0.0940925	20074.2
Zr29_L3	1089.21	1.56439	1089.29	1.56437	1089.7	3.30047	1090.68	8.77167	1090.52	8.77198	0.496779	0.134474	0.570289	15.5954	0.620935	25.116	0.184077	0.156102	1.92469	0.493929	0.0758675	0.436648	1513.34
Zr41_L3	1090.36	1.36995	1090.44	1.36994	1093.54	1.61578	1099.88	3.1922	1099.72	3.19241	0.780244	0.865011	0.505549	81.4707	0.896171	90.9097	0.184289	0.136567	1.93579	0.241334	0.0762171	0.156191	5514.18
Zr45_L3	1093.46	1.94874	1093.54	1.94866	1092.78	10.3587	1091.42	30.0753	1091.26	30.0762	0.298055	-0.186909	0.509673	17.2081	2.56935	6.69743	0.184858	0.19376	1.93357	1.54779	0.0758957	1.50112	423.194
Zr53_L3	1089.62	1.02674	1089.7	1.02674	1091.9	1.35777	1096.44	2.51595	1096.29	2.51619	0.86314	0.622578	0.566568	101.62	0.705932	143.952	0.184152	0.102417	1.93103	0.202968	0.0760864	0.121385	8591.85
Zr54_L3	1097.22	0.944132	1097.3	0.944132	1096.98	1.44042	1096.49	2.98462	1096.34	2.98485	0.8122	-0.066342	0.53627	55.7939	0.591625	94.3061	0.18555	0.093578	1.94574	0.214768	0.0760883	0.145498	5677.3
Zr58_L3	1101.28	1.08466	1101.36	1.08466	1100.34	1.58963	1098.47	3.3581	1098.31	3.35833	0.77511	-0.256524	0.554199	143.081	1.8458	77.517	0.186297	0.107143	1.9555	0.236614	0.0761633	0.164618	4649.33
Zr29_R	1096.65	1.20012	1096.73	1.20011	1095.82	2.19652	1094.18	5.47245	1094.03	5.4727	0.600591	-0.225655	0.573849	28.0664	0.666906	42.0845	0.185444	0.119007	1.94238	0.327695	0.0760004	0.271361	2520.88
Zr41_R	1097.59	1.20735	1097.67	1.20735	1097.26	1.27967	1096.6	2.08212	1096.44	2.08233	0.873796	-0.0909201	0.514115	174.599	0.291769	598.417	0.185618	0.11963	1.94655	0.190773	0.0760922	0.0987705	36122.2
Zr45_R	1097.55	2.62127	1097.63	2.62124	1097.45	2.47614	1097.26	4.48829	1097.1	4.48852	0.800073	-0.0264911	0.545657	13.3764	0.225908	59.2118	0.18561	0.259737	1.94711	0.369106	0.0761173	0.221878	3563.27
Zr53_R	1096.25	1.24978	1096.33	1.24977	1096.3	1.30428	1096.38	1.89334	1096.22	1.89362	0.917722	0.0111694	0.572643	558.336	1.25634	444.415	0.185372	0.123972	1.94376	0.194536	0.0760838	0.0887787	26448.5
Zr54_R	1095.83	0.901648	1095.91	0.901653	1096.07	1.16275	1096.53	1.90715	1096.37	1.90741	0.934681	0.0631442	0.549995	217.785	0.5044	431.77	0.185295	0.089471	1.94309	0.173446	0.0760895	0.0895155	25838.7
Zr58_R	1095.52	1.20755	1095.6	1.20754	1096.34	1.36487	1097.95	2.15864	1097.8	2.15889	0.905148	0.22122	0.531836	202.669	0.561612	360.871	0.185237	0.119857	1.94387	0.20357	0.0761437	0.102812	21694.4
a Isotopic dates calculated using λ238 = 1.55125E-10 (Jaffey et al. 1971) and λ235 = 9.8485E-10 (Jaffey et al. 1971).
b Corrected for initial Th/U disequilibrium using radiogenic 208Pb and Th/U[magma] = 3.50000.
c % discordance = 100 - (100 * (206Pb/238U date) / (207Pb/206Pb date))
d Th contents calculated from radiogenic 208Pb and 230Th-corrected 206Pb/238U date of the sample, assuming concordance between U-Pb Th-Pb systems.
e Total mass of radiogenic Pb.
f Total mass of common Pb.
g Ratio of radiogenic Pb (including 208Pb) to common Pb.
h Measured ratios corrected for fractionation, tracer and blank.
i Measured ratio corrected for fractionation and spike contribution only.

## Sheet: SAM-47
Table S1. SAM-47 ID-TIMS U-Pb isotopic results
	Dates (Ma)												Composition				Isotopic Ratios
			206Pb/						207Pb/
	206Pb/	±2σ	238U	±2σ	207Pb/	±2σ	207Pb/	±2σ	206Pb	±2σ	Corr.		Th/	Pb*	Pbc	Pb*/	206Pb/		207Pb/		207Pb/		206Pb/
Fraction	238U a	abs	<Th> b	abs	235U a	abs	206Pb a	abs	<Th> b	abs	coef.	% disc c	U d	(pg) e	(pg) f	Pbc g	238U h	±2σ %	235U h	±2σ %	206Pb h	±2σ %	204Pb i
180 °C Experiment
Zr21_L1	1348.27	6.60763	1348.35	6.60695	2249.86	22.5971	3214.03	35.4925	3213.93	35.494	0.547317	58.0505	0.508403	212.127	104.648	2.02704	0.232631	0.543118	8.16855	2.49792	0.254784	2.24688	125.148
Zr23_L1	2040.94	9.4404	2041.01	9.43976	2722.41	22.6743	3275.9	33.7825	3275.85	33.7834	0.548312	37.6983	0.750433	133.088	62.2321	2.13857	0.372455	0.53963	13.6021	2.39724	0.264988	2.14903	125.37
Zr30_L1	1545.08	5.24411	1545.16	5.24365	2218.67	18.5283	2915.62	30.3584	2915.53	30.3594	0.546404	47.0067	0.446041	309.401	108.94	2.8401	0.270843	0.381705	7.89113	2.056	0.211405	1.87461	174.976
Zr35_L1	1766.39	9.61379	1766.46	9.61303	2575.65	25.343	3292.84	38.1068	3292.77	38.108	0.545598	46.3567	0.52757	48.5376	27.0093	1.79707	0.315229	0.62223	11.637	2.71039	0.267861	2.42735	112.05
Zr39_L1	1778.48	3.03989	1778.55	3.03968	2424.58	8.26956	3022.35	12.8733	3022.27	12.8737	0.566399	41.1556	0.428086	191.978	30.6368	6.26625	0.317699	0.195587	9.89	0.896777	0.225878	0.801701	361.73
Zr43_L1	2407.81	7.6838	2407.87	7.68338	2918.35	15.311	3292.24	22.3354	3292.19	22.336	0.553001	26.8641	0.598801	24.5059	7.85855	3.11837	0.452827	0.382419	16.7102	1.59814	0.267758	1.42243	179.164
Zr21_L2	3085.06	1.78095	3085.12	1.78093	3203.1	1.54125	3277.88	1.50322	3277.84	1.50326	0.923252	5.88241	0.500671	137.106	1.64502	83.3464	0.613766	0.0726394	22.443	0.158553	0.265322	0.0900101	4418.77
Zr23_L2	3183.81	2.76664	3183.87	2.76659	3261.67	2.41211	3309.89	2.75459	3309.86	2.75465	0.779996	3.80921	0.615082	94.7652	3.18103	29.7907	0.638677	0.110115	23.8351	0.247524	0.270789	0.172704	1552.33
Zr30_L2	2938.96	3.11012	2939.02	3.11005	3134.92	3.3889	3262.91	4.3736	3262.87	4.37369	0.676974	9.92841	0.513949	140.689	8.30261	16.9451	0.577601	0.131773	20.9206	0.349709	0.262808	0.27608	911.722
Zr35_L2	3162.42	2.3263	3162.47	2.32626	3251.58	1.8559	3307.04	1.97864	3307	1.97868	0.81882	4.37325	0.493507	40.5096	0.856672	47.2871	0.633246	0.0930735	23.5895	0.190527	0.270297	0.121966	2510.72
Zr39_L2	2913.94	2.49197	2914	2.49191	3131.51	2.80738	3274.1	3.52327	3274.06	3.52335	0.730889	11.0004	0.501696	95.848	4.44461	21.565	0.571491	0.106298	20.847	0.289747	0.264685	0.221773	1156.26
Zr43_L2	3306.2	11.8833	3306.26	11.8831	3310.71	7.58779	3313.44	8.86973	3313.41	8.86988	0.692774	0.218471	0.588639	23.7852	3.01296	7.89429	0.670085	0.459438	25.064	0.777099	0.271402	0.565012	427.194
Zr21_L3	3184.19	2.12854	3184.24	2.12851	3255.8	1.6005	3300.21	1.54089	3300.17	1.54093	0.880869	3.5156	0.505153	108.36	1.3759	78.7561	0.638771	0.0847102	23.6919	0.164278	0.269122	0.092733	4163.89
Zr23_L3	3240.53	2.25961	3240.59	2.25958	3286.38	1.6215	3314.47	1.50249	3314.44	1.50253	0.892031	2.23093	0.600673	75.2049	0.842311	89.2839	0.653158	0.0887178	24.4469	0.166226	0.271581	0.0902478	4626.97
Zr30_L3	3091.99	2.79693	3092.05	2.79689	3213.97	1.92798	3291.01	1.72487	3290.97	1.72491	0.890302	6.04735	0.522777	111.557	1.47976	75.3887	0.615501	0.113878	22.6954	0.198244	0.267549	0.104992	3975.52
Zr35_L3	3286.12	10.307	3286.18	10.3068	3303.73	9.53518	3314.44	12.8562	3314.4	12.8564	0.564414	0.854323	0.515065	31.7759	5.99534	5.3001	0.664891	0.400358	24.8855	0.976808	0.271575	0.819719	296.696
Zr39_L3	3157.61	2.43789	3157.67	2.43786	3248.32	1.87792	3304.81	1.95743	3304.77	1.95748	0.826796	4.4539	0.525976	72.3508	1.5684	46.1302	0.63203	0.0976533	23.5107	0.192814	0.269912	0.120544	2435.2
Zr43_L3	3308.11	7.44497	3308.17	7.44468	3312.79	11.3058	3315.62	16.1023	3315.58	16.1026	0.551311	0.22629	0.589382	26.5804	6.29547	4.22215	0.670581	0.287714	25.1173	1.15778	0.27178	1.02708	237.035
Zr21_R	3296.76	2.4214	3296.82	2.42137	3310.08	1.54517	3318.16	1.23873	3318.12	1.23876	0.929268	0.644804	0.505442	459.61	0.694836	661.465	0.667641	0.0938226	25.0478	0.158251	0.27222	0.07214	34778.1
Zr23_R	3302.33	2.14431	3302.39	2.14429	3313.13	1.47302	3319.68	1.21969	3319.64	1.21973	0.941815	0.522476	0.582589	499.206	0.752126	663.727	0.669083	0.0829788	25.1262	0.150844	0.272484	0.0708164	34385.7
Zr30_R	3260.32	2.52721	3260.38	2.52718	3294.02	1.72309	3314.6	1.39807	3314.56	1.39811	0.945463	1.63751	0.541725	775.975	1.434	541.125	0.658241	0.0987613	24.6391	0.176586	0.271603	0.0831361	28264.9
Zr35_R	3318.48	2.0325	3318.53	2.03248	3320.07	1.4504	3321.03	1.23251	3320.99	1.23255	0.945269	0.0767142	0.559152	422.765	0.524244	806.429	0.673269	0.0783591	25.3052	0.148487	0.272719	0.071724	41956.7
Zr39_R	3294.29	2.25706	3294.35	2.25703	3309.61	1.50099	3318.9	1.21756	3318.86	1.2176	0.938497	0.74129	0.581485	473.779	0.383681	1234.83	0.667003	0.0875051	25.0357	0.153729	0.272349	0.0706614	63972.7
Zr43_R	3320.36	2.04635	3320.42	2.04633	3320.65	1.45206	3320.83	1.2311	3320.8	1.23113	0.944303	0.014131	0.601511	476.046	0.98695	482.341	0.673758	0.0788589	25.3205	0.148654	0.272685	0.0716235	24904.6
210 °C Experiment
Zr02_L1	1667.27	4.81217	1667.34	4.81209	2439.54	4.62415	3165.56	5.92342	3165.49	5.92348	0.665957	47.3312	0.492819	1105.56	112.504	9.82683	0.29516	0.327558	10.0516	0.500717	0.247099	0.372147	543.158
Zr08_L1	1516.91	2.92305	1516.99	2.92296	2284.4	5.0567	3065.75	8.07272	3065.66	8.07285	0.422258	50.5206	0.414813	474.91	65.5158	7.2488	0.265302	0.216258	8.48575	0.556697	0.232083	0.503926	416.13
Zr13_L1	2265.2	6.01637	2265.26	6.01623	2814.24	7.73087	3235.23	12.0347	3235.17	12.0348	0.344666	29.9833	0.55094	1134.76	254.734	4.45469	0.42104	0.314992	14.9842	0.812187	0.258229	0.762527	252.556
Zr22_L1	2485.93	8.12525	2485.99	8.12508	2976.35	9.87189	3326.83	15.4158	3326.79	15.416	0.297142	25.2764	0.776453	364.43	106.215	3.43105	0.47054	0.393912	17.7512	1.027	0.273732	0.984083	189.491
Zr27_L1	1961.54	8.89661	1961.61	8.89636	2702.82	13.2149	3315.81	21.19	3315.75	21.1902	0.275604	40.8429	0.526279	499.277	208.789	2.3913	0.355654	0.526051	13.3231	1.39916	0.271813	1.35189	143.39
Zr41_L1	2119.2	6.25859	2119.27	6.25842	2795.45	8.58362	3327.67	13.5069	3327.61	13.507	0.305178	36.3158	0.525941	133.418	35.625	3.74508	0.389218	0.346526	14.6912	0.9029	0.273878	0.862134	213.936
Zr02_L2	3299.76	2.51209	3299.81	2.51206	3312.33	1.71885	3319.94	1.4242	3319.91	1.42424	0.939739	0.60804	0.579462	210.129	0.671094	313.114	0.668416	0.0972689	25.1055	0.176024	0.272531	0.0848515	16312.8
Zr08_L2	3326.16	8.3883	3326.22	8.38814	3324.21	7.84984	3323.03	11.8693	3322.99	11.8694	0.338212	-0.0943852	0.554402	88.0693	20.5458	4.28648	0.675264	0.322824	25.4127	0.803513	0.273068	0.757181	242.701
Zr13_L2	3286.78	2.76423	3286.84	2.76419	3305.31	1.78625	3316.57	1.44402	3316.53	1.44407	0.929373	0.898011	0.583096	386.955	1.18907	325.427	0.665062	0.107355	24.9257	0.182976	0.271944	0.0861807	16947.5
Zr22_L2	3318.57	2.39592	3318.63	2.39589	3320.54	1.69421	3321.73	1.4045	3321.7	1.40455	0.954197	0.0950055	0.651036	234.165	0.716288	326.915	0.673293	0.0923682	25.3175	0.173445	0.272842	0.0835161	16803.5
Zr27_L2	3306.32	2.71464	3306.38	2.71461	3314.85	1.7665	3320.01	1.41872	3319.98	1.41876	0.935826	0.412377	0.522702	164.046	0.574747	285.423	0.670116	0.104952	25.1705	0.180886	0.272543	0.0844772	15032.6
Zr41_L2	3311.06	3.81295	3311.11	3.81289	3317.37	3.01413	3321.19	3.89179	3321.16	3.89182	0.607218	0.305088	0.553073	78.2099	5.49368	14.2363	0.671343	0.147253	25.2355	0.308609	0.272748	0.24631	763.109
Zr02_L3	3312.23	3.06755	3312.29	3.06751	3317.53	2.0085	3320.73	1.8922	3320.7	1.89224	0.856559	0.255984	0.628825	56.3106	1.27538	44.1521	0.671648	0.118434	25.2396	0.205644	0.272669	0.116304	2295.1
Zr08_L3	3320.05	7.58461	3320.1	7.58454	3321.53	3.37911	3322.42	2.24216	3322.39	2.2422	0.912871	0.0713576	0.589583	33.8452	0.872015	38.8126	0.673676	0.292304	25.3431	0.345923	0.272962	0.139388	2034.22
Zr13_L3	3293.76	5.66887	3293.82	5.66879	3307.92	3.86108	3316.51	4.96699	3316.48	4.96702	0.59951	0.685807	0.594025	94.4992	8.61488	10.9693	0.666866	0.219806	24.9924	0.395473	0.271934	0.315309	588.116
Zr22_L3	3316.5	2.75823	3316.55	2.75819	3319.2	1.83285	3320.84	1.57871	3320.81	1.57875	0.910964	0.130865	0.621843	133.16	1.71643	77.5793	0.672754	0.106387	25.2829	0.187647	0.272687	0.095352	4023.87
Zr27_L3	3316.74	8.71195	3316.8	8.71187	3320.27	3.60061	3322.4	1.6389	3322.36	1.63893	0.960089	0.170264	0.535392	78.7443	0.391916	200.921	0.672818	0.336007	25.3104	0.368617	0.272958	0.099418	10559.7
Zr41_L3	3314.55	2.91864	3314.6	2.91861	3317.65	1.83714	3319.53	1.5019	3319.49	1.50194	0.917496	0.149956	0.54538	38.3697	0.317524	120.84	0.672249	0.112625	25.2427	0.188098	0.272458	0.0901426	6348.53
Zr02_R	3311.4	4.19031	3311.45	4.19026	3318.79	2.30281	3323.26	1.82323	3323.23	1.82325	0.894043	0.356966	0.591862	28.0302	0.493632	56.7836	0.671431	0.161814	25.2722	0.235766	0.273108	0.111747	2965.75
Zr08_R	3314.38	2.8353	3314.44	2.83526	3318.89	1.8074	3321.61	1.46319	3321.58	1.46323	0.925745	0.217672	0.547114	59.9621	0.220043	272.502	0.672206	0.109413	25.2748	0.185044	0.272822	0.0875259	14284.5
Zr13_R	3316.79	3.09219	3316.85	3.09216	3319.36	1.86925	3320.91	1.50966	3320.88	1.5097	0.910426	0.124068	0.607648	36.1653	0.280044	129.141	0.672831	0.11926	25.287	0.191373	0.2727	0.0906801	6703.55
Zr22_R	3316.82	2.44428	3316.87	2.44425	3319.96	1.70283	3321.86	1.39392	3321.83	1.39397	0.954033	0.151863	0.604556	315.88	0.169542	1863.13	0.672838	0.0942705	25.3025	0.174331	0.272865	0.0827914	96507.2
Zr27_R	3306.07	6.42848	3306.12	6.42842	3315.95	2.8251	3321.92	1.51029	3321.89	1.51033	0.94687	0.47734	0.533538	118.033	0.297855	396.277	0.67005	0.248549	25.1987	0.289271	0.272876	0.0907309	20815.9
Zr41_R	3290.97	31.4045	3291.03	31.4042	3310	11.9939	3321.54	1.66416	3321.5	1.66419	0.996262	0.920242	0.540446	42.5099	0.258393	164.517	0.666144	1.21848	25.0456	1.22838	0.272809	0.101107	8641.08
a Isotopic dates calculated using λ238 = 1.55125E-10 (Jaffey et al. 1971) and λ235 = 9.8485E-10 (Jaffey et al. 1971).
b Corrected for initial Th/U disequilibrium using radiogenic 208Pb and Th/U[magma] = 3.50000.
c % discordance = 100 - (100 * (206Pb/238U date) / (207Pb/206Pb date))
d Th contents calculated from radiogenic 208Pb and 230Th-corrected 206Pb/238U date of the sample, assuming concordance between U-Pb Th-Pb systems.
e Total mass of radiogenic Pb.
f Total mass of common Pb.
g Ratio of radiogenic Pb (including 208Pb) to common Pb.
h Measured ratios corrected for fractionation, tracer and blank.
i Measured ratio corrected for fractionation and spike contribution only.

## Sheet: KR18-04
Table S1. KR18-04 ID-TIMS U-Pb isotopic results
	Dates (Ma)												Composition				Isotopic Ratios
			206Pb/						207Pb/
	206Pb/	±2σ	238U	±2σ	207Pb/	±2σ	207Pb/	±2σ	206Pb	±2σ	Corr.		Th/	Pb*	Pbc	Pb*/	206Pb/		207Pb/		207Pb/		206Pb/
Fraction	238U a	abs	<Th> b	abs	235U a	abs	206Pb a	abs	<Th> b	abs	coef.	% disc c	U d	(pg) e	(pg) f	Pbc g	238U h	±2σ %	235U h	±2σ %	206Pb h	±2σ %	204Pb i
180 °C Experiment
Zr07_L1	329.546	129.49	329.628	129.477	-66.9174	2311.42	-	-	-	-	0.242381	-	0.716957	1.64917	63.7772	0.0258583	0.05245	40.3063	-0.0637789	-3341.57	-0.00882319	-3351.57	20.2065
Zr15_L1	128.563	22.7819	128.642	22.7778	99.3417	334.697	-556.035	9420.49	-557.708	9423.98	0.243228	123.121	0.911604	0.932372	14.6654	0.0635765	0.0201435	17.8977	0.102783	353.665	0.0370236	349.743	22.1842
Zr23_L1	201.479	19.2866	201.551	19.2849	185.266	263.624	-16.7713	3713.6	-17.6421	3714.27	0.245655	1301.33	1.13439	1.00296	8.0796	0.124134	0.031748	9.72287	0.200165	155.671	0.0457473	153.572	25.1826
Zr31_L1	341.234	0.817241	341.306	0.817361	393.896	8.42192	716.003	53.5509	715.541	53.5559	0.281893	52.3418	1.05309	7.59299	1.37737	5.51266	0.05436	0.24589	0.473924	2.57957	0.0632593	2.5211	311.986
Zr33_L1	175.777	3.74258	175.838	3.74246	204.653	49.671	551.834	574.14	551.068	574.228	0.267536	68.1468	1.49112	0.567875	0.907112	0.626025	0.0276425	2.15833	0.223301	26.7988	0.0586147	26.3037	48.9346
Zr07_L2	898.345	171.529	898.391	171.528	562.266	1799.3	-640.069	11302.2	-640.22	11302.6	0.243274	240.351	1.80244	0.864848	12.9887	0.0665845	0.149533	20.4552	0.73976	416.748	0.0358962	412.249	21.7408
Zr15_L2	969.142	153.075	969.218	153.068	88.111	2599.28	-	-	-	-	0.263654	-	0.681583	0.198393	3.18587	0.0622729	0.162227	17.012	0.0906525	3079.86	0.00405462	3075.42	22.4468
Zr19_L2	783.635	3.10975	783.705	3.10966	770.931	23.0963	734.301	88.5903	734.099	88.5938	0.265856	-6.71847	0.955854	1.93552	0.608852	3.17896	0.129259	0.421445	1.13668	4.27578	0.0638074	4.18338	192.465
Zr23_L2	931.323	44.052	931.386	44.0507	746.614	381.8	226.333	1643.52	226.165	1643.58	0.251775	-311.484	1.15738	0.406435	1.67379	0.242823	0.155429	5.07995	1.08611	72.222	0.0507035	71.1131	31.4682
Zr31_L2	772.351	4.73177	772.418	4.73162	756.628	39.6798	710.435	155.221	710.239	155.227	0.252642	-8.71521	1.07188	6.51019	3.48358	1.86882	0.127284	0.650078	1.10679	7.43867	0.0630937	7.3015	118.225
Zr07_L3	815.263	32.544	815.336	32.5426	723.559	285.375	448.85	1204.82	448.641	1204.87	0.252269	-81.6336	0.864112	0.554793	2.03831	0.272183	0.134813	4.24958	1.03928	55.148	0.0559365	54.2321	33.9262
Zr15_L3	831.518	21.3333	831.587	21.3326	785.384	157.124	656.495	604.376	656.306	604.398	0.247578	-26.6602	0.991651	0.367308	0.74613	0.492285	0.137678	2.73461	1.16731	28.7308	0.0615199	28.1786	45.3906
Zr19_L3	766.404	6.10567	766.474	6.10544	763.064	49.9341	753.293	192.748	753.088	192.755	0.253651	-1.74039	0.964965	1.95135	1.36021	1.4346	0.126244	0.844961	1.12018	9.3079	0.0643832	9.13017	96.8648
Zr23_L3	862.65	121.717	862.724	121.712	516.752	1315.74	-822.961	9166.86	-823.222	9167.4	0.24666	204.823	0.789661	0.143694	1.95364	0.0735518	0.143185	15.0748	0.663499	324.879	0.0336229	321.492	22.9114
Zr31_L3	762.593	1.60499	762.661	1.605	757.295	11.8207	741.683	45.718	741.483	45.7199	0.28567	-2.81932	1.04382	5.9822	0.951315	6.28835	0.125579	0.223158	1.10817	2.21468	0.0640304	2.16129	355.592
Zr33_L3	795.016	50.283	794.989	50.2877	679.905	450.164	315.273	2033.29	315.354	2033.26	0.248707	-152.168	4.47144	0.35993	1.12054	0.321211	0.131254	6.7228	0.953465	90.8326	0.0527091	89.398	28.4274
Zr07_R	754.82	0.648176	754.894	0.648274	754.539	1.00787	753.708	2.56647	753.488	2.56703	0.85141	-0.147526	0.827852	37.1159	0.101595	365.333	0.124222	0.0909971	1.10246	0.189295	0.0643958	0.117112	20581.2
Zr15_R	756.008	0.655873	756.082	0.655973	755.507	1.00043	754.023	2.56891	753.805	2.56948	0.836789	-0.263257	0.841319	12.588	0.0495913	253.835	0.124429	0.0919413	1.10446	0.187736	0.0644054	0.117238	14260.6
Zr19_R	752.975	0.560978	753.044	0.561156	753.268	0.834204	754.139	1.93523	753.932	1.93605	0.905739	0.154346	0.988562	94.4949	0.225271	419.472	0.1239	0.0789373	1.09983	0.156856	0.064409	0.0856704	22768.5
Zr23_R	756.922	0.559791	756.995	0.559919	755.917	0.901128	752.948	2.27155	752.732	2.27217	0.87328	-0.527807	0.862318	23.3349	0.0819597	284.712	0.124589	0.0783831	1.10532	0.169039	0.0643726	0.10252	15915.4
Zr31_R	752.922	0.72676	752.991	0.726895	752.741	0.873666	752.205	1.75296	751.998	1.75386	0.90962	-0.0953307	0.994317	141.221	0.0654877	2156.45	0.123891	0.102272	1.09874	0.164354	0.06435	0.0763304	116825
Zr33_R	758.554	0.643	758.627	0.643111	756.002	1.43805	748.461	4.81365	748.246	4.81412	0.596656	-1.34848	0.871197	8.11388	0.078498	103.364	0.124874	0.0898517	1.10549	0.269738	0.064236	0.225486	5778.7
210 °C Experiment
Zr01_L1	297.685	2.25613	297.764	2.25592	360.45	26.0842	787.207	176.494	786.636	176.514	0.288291	62.1847	0.837427	3.78645	2.44916	1.54602	0.0472611	0.775528	0.426166	8.59685	0.0654287	8.40608	104.957
Zr02_L1	202.817	24.4054	202.899	24.4017	205.99	326.811	242.446	3977.91	241.502	3978.67	0.251479	16.3455	0.791514	1.6679	18.124	0.092027	0.0319622	12.2235	0.224912	175.291	0.0510587	172.623	23.8763
Zr03_L1	377.412	0.867909	377.471	0.868184	433.607	8.03836	744.25	46.6391	743.907	46.6427	0.350229	49.2896	1.47735	5.94914	0.848877	7.00825	0.0602938	0.236761	0.532711	2.27775	0.0641082	2.20576	358.8
Zr04_L1	186.238	0.762056	186.314	0.76213	230.974	9.56823	715.006	96.4087	714.123	96.4252	0.26693	73.953	0.978579	3.8252	1.28152	2.9849	0.0293115	0.415124	0.255425	4.63157	0.0632296	4.53831	179.9
Zr05_L1	344.564	2.83564	344.639	2.83542	364.761	32.1113	495.25	226.266	494.758	226.288	0.289175	30.4263	0.96303	1.79124	1.22139	1.46656	0.0549047	0.845156	0.432233	10.4791	0.0571219	10.2666	98.6659
Zr06_L1	324.586	0.737502	324.659	0.737634	382.934	6.84666	752.749	44.0809	752.265	44.0853	0.301387	56.8799	1.04972	5.85913	0.845334	6.93114	0.0516406	0.232981	0.458097	2.14624	0.0643666	2.08762	387.381
Zr08_L1	268.371	1.6109	268.442	1.61088	310.314	19.2387	638.751	151.865	638.169	151.882	0.26161	57.985	1.11947	1.38186	0.672099	2.05604	0.0425098	0.612833	0.357456	7.19529	0.0610137	7.05972	126.48
Zr09_L1	391.82	0.479166	391.897	0.47934	448	3.49015	747.754	19.6708	747.325	19.6726	0.319401	47.6004	0.86732	9.17103	0.646924	14.1764	0.0626663	0.126047	0.554591	0.963511	0.0642145	0.930373	806.153
Zr10_L1	572.012	1.40219	572.087	1.40219	608.553	11.4317	747.05	51.5813	746.764	51.5842	0.269164	23.4305	0.900819	4.35911	0.784355	5.55757	0.0927893	0.25617	0.820904	2.49732	0.0641931	2.44065	325.57
Zr11_L1	268.763	1.45923	268.838	1.45918	320.475	17.244	715.684	130.701	715.078	130.716	0.260544	62.4467	0.989033	6.92302	3.15482	2.19442	0.0425731	0.55434	0.371108	6.27451	0.0632498	6.15331	137.024
Zr12_L1	376.137	1.20759	376.209	1.20762	427.991	12.8612	717.74	76.7346	717.32	76.7409	0.251141	47.5943	1.03657	2.76199	0.723699	3.81649	0.0600841	0.330507	0.524257	3.6827	0.063311	3.61374	222.573
Zr13_L1	311.679	2.41928	311.723	2.41954	365.947	27.4723	725.95	185.767	725.641	185.779	0.269185	57.066	2.0065	1.92656	1.00707	1.91304	0.0495371	0.795125	0.433906	8.94108	0.0635565	8.76052	102.241
Zr01_L2	780.282	4.50518	780.356	4.50511	774.8	11.6642	759.034	42.4359	758.823	42.4378	0.363629	-2.79935	0.826897	2.25599	0.32011	7.04754	0.128672	0.613026	1.14483	2.15218	0.0645586	2.01174	415.443
Zr02_L2	792.609	4.76768	792.683	4.76748	791.658	32.4931	788.978	120.789	788.77	120.794	0.294465	-0.460277	0.818328	1.15373	0.514288	2.24335	0.130832	0.639254	1.18074	5.91032	0.0654839	5.75451	145.123
Zr03_L2	760.949	1.64356	761.021	1.64355	762.438	9.17775	766.807	35.0197	766.595	35.0212	0.278828	0.764024	0.886795	3.15597	0.366338	8.61492	0.125292	0.228986	1.11888	1.71171	0.0647971	1.66215	496.779
Zr04_L2	754.476	3.8191	754.55	3.81894	739.918	29.3563	696.103	116.563	695.883	116.568	0.263605	-8.38567	0.846864	2.24825	0.927189	2.4248	0.124162	0.536391	1.0724	5.58711	0.0626703	5.47015	154.677
Zr05_L2	759.335	2.16978	759.409	2.16975	748.649	9.04811	716.841	34.5738	716.622	34.5755	0.347699	-5.92792	0.833842	1.67359	0.182085	9.19127	0.12501	0.302907	1.0903	1.7084	0.0632842	1.62772	535.689
Zr06_L2	759.447	3.43491	759.521	3.43476	743.076	28.3869	694.063	112.522	693.844	112.527	0.267875	-9.42042	0.833473	4.16107	1.67324	2.48683	0.125029	0.479455	1.07886	5.38702	0.0626103	5.27874	158.61
Zr08_L2	777.179	10.0751	777.252	10.0748	743.669	64.8363	644.069	258.582	643.854	258.593	0.247157	-20.6671	0.853727	0.782953	0.696161	1.12467	0.128128	1.37609	1.08007	12.2974	0.0611648	12.0314	81.7167
Zr09_L2	755.702	0.72485	755.776	0.724922	756.836	2.88814	760.187	10.7164	759.968	10.717	0.409948	0.590068	0.822783	9.37197	0.350084	26.7707	0.124376	0.101649	1.10722	0.541332	0.0645939	0.507141	1526.99
Zr10_L2	774.792	3.73018	774.865	3.73004	785.119	30.0229	814.576	112.48	814.368	112.485	0.260195	4.88409	0.868178	4.70511	2.03129	2.31632	0.127711	0.510955	1.16674	5.49105	0.0662891	5.38066	147.622
Zr11_L2	755.179	0.989257	755.251	0.989305	753.649	4.25923	749.111	15.7936	748.895	15.7944	0.455711	-0.809988	0.868634	6.18779	0.293942	21.0511	0.124285	0.138819	1.10062	0.800594	0.0642558	0.746901	1192.36
Zr12_L2	765.421	1.96363	765.494	1.9636	755.193	13.397	725.021	52.0068	724.808	52.009	0.280954	-5.57234	0.887021	2.54735	0.451288	5.64462	0.126073	0.272074	1.10381	2.51472	0.0635286	2.452	332.217
Zr01_L3	755.332	1.41666	755.406	1.41665	750.742	7.19566	737.085	27.4482	736.865	27.4495	0.365123	-2.47559	0.823144	3.50584	0.298743	11.7353	0.124312	0.198756	1.09461	1.35608	0.0638914	1.29636	680.134
Zr04_L3	754.531	1.54299	754.603	1.543	754.077	5.27656	752.73	19.6451	752.516	19.6461	0.381934	-0.239353	0.8972	3.66642	0.228958	16.0135	0.124172	0.216698	1.1015	0.991437	0.064366	0.929908	905.506
Zr05_L3	749.651	3.81856	749.724	3.81845	743.495	18.2514	725.002	70.0208	724.782	70.0241	0.368787	-3.39975	0.852833	2.58222	0.530022	4.87192	0.123321	0.539571	1.07971	3.46227	0.0635281	3.30144	291.405
Zr06_L3	753.619	0.968516	753.693	0.968554	752.857	4.44088	750.594	16.8815	750.374	16.8823	0.340329	-0.40305	0.829666	5.88516	0.341314	17.2427	0.124013	0.136174	1.09898	0.835329	0.0643009	0.798641	988.768
Zr08_L3	784.301	26.8248	784.373	26.8237	734.989	230.171	587.463	938.331	587.25	938.369	0.248094	-33.5065	0.87754	1.07566	3.36767	0.319408	0.129375	3.6325	1.06237	44.0059	0.0595823	43.2481	36.4688
Zr09_L3	751.179	1.2221	751.254	1.2221	745.16	7.93843	727.12	30.9132	726.897	30.9146	0.317399	-3.3088	0.806066	9.42218	1.02159	9.2231	0.123587	0.172353	1.08313	1.50363	0.0635915	1.45775	540.719
Zr10_L3	752.337	5.07004	752.412	5.06981	738.813	42.8947	698.032	170.794	697.809	170.801	0.25767	-7.77973	0.820405	4.95781	3.05339	1.62371	0.123789	0.713995	1.07015	8.17206	0.0627271	8.01775	110.292
Zr11_L3	753.259	0.866293	753.332	0.866357	755.341	3.63988	761.509	13.7397	761.293	13.7404	0.341305	1.08342	0.863672	6.74895	0.308985	21.8423	0.12395	0.121856	1.10412	0.683142	0.0646344	0.650878	1237.51
Zr12_L3	753.932	3.75132	754.005	3.75117	738.241	30.9634	690.924	123.343	690.705	123.348	0.267272	-9.11945	0.85963	2.88473	1.25258	2.30303	0.124067	0.527231	1.06898	5.90207	0.0625182	5.78342	147.474
Zr13_L3	747.474	3.51194	747.55	3.51181	690.404	29.385	508.671	127.202	508.435	127.208	0.203942	-46.9465	0.767673	1.42114	0.541988	2.62209	0.122942	0.497607	0.973769	5.86592	0.0574712	5.78489	169.121
Zr01_R	750.489	1.37317	750.563	1.37319	750.221	2.04633	749.423	4.8486	749.202	4.84928	0.894232	-0.142203	0.828036	24.0015	0.076652	313.122	0.123467	0.193828	1.09354	0.385828	0.0642653	0.227194	17642.8
Zr02_R	751.171	0.755161	751.247	0.755222	751.368	1.55099	751.954	5.06135	751.728	5.06181	0.630424	0.104075	0.771383	11.991	0.17791	67.3993	0.123586	0.106502	1.0959	0.292131	0.0643423	0.237464	3863.21
Zr04_R	750.64	0.732214	750.712	0.732316	749.759	1.25447	747.131	3.58973	746.918	3.59031	0.773214	-0.469698	0.92389	19.6729	0.0814305	241.591	0.123494	0.103335	1.09259	0.236623	0.0641956	0.166704	13317.7
Zr05_R	750.962	1.12983	751.034	1.12989	750.08	1.7443	747.451	5.90382	747.237	5.90428	0.529643	-0.469777	0.913032	12.7001	0.076236	166.59	0.12355	0.159384	1.09325	0.328922	0.0642053	0.277478	9211.94
Zr06_R	751.692	0.681518	751.767	0.681594	750.262	1.68201	746	5.69566	745.778	5.69614	0.610222	-0.763051	0.812588	52.0734	0.995951	52.2851	0.123677	0.0960532	1.09362	0.317124	0.0641613	0.267493	2972.5
Zr08_R	752.692	0.685224	752.764	0.685338	751.11	1.8241	746.403	6.58736	746.189	6.58779	0.456321	-0.842548	0.904827	12.4671	0.262566	47.4819	0.123851	0.0964547	1.09537	0.343652	0.0641735	0.309972	2644.01
Zr09_R	751.963	0.553652	752.037	0.553773	752.346	0.911966	753.484	2.38248	753.264	2.38306	0.851595	0.201876	0.832497	70.1044	0.364808	192.168	0.123724	0.0780053	1.09792	0.171619	0.064389	0.108032	10822.6
Zr10_R	752.267	0.551397	752.341	0.55152	752.236	0.94112	752.143	2.54963	751.924	2.55019	0.829616	-0.016529	0.838109	39.6084	0.201789	196.287	0.123777	0.0776579	1.0977	0.177123	0.0643481	0.116252	11040.1
Zr11_R	752.771	0.56424	752.842	0.564388	752.356	0.922654	751.121	2.46213	750.908	2.46277	0.828974	-0.219621	0.91731	50.4281	0.276863	182.141	0.123865	0.0794166	1.09794	0.173629	0.064317	0.111922	10059.6
Zr12_R	752.396	0.563788	752.469	0.563913	752.291	1.13954	751.978	3.47816	751.76	3.47866	0.738918	-0.0556153	0.858523	27.2564	0.261163	104.366	0.1238	0.0793903	1.09781	0.214456	0.0643431	0.161452	5850.84
Zr13_R	752.534	0.573152	752.606	0.573293	752.397	1.29109	751.99	4.20558	751.777	4.20607	0.659763	-0.072284	0.910178	18.8575	0.238829	78.9579	0.123824	0.0806949	1.09803	0.242955	0.0643434	0.196476	4378.45
a Isotopic dates calculated using λ238 = 1.55125E-10 (Jaffey et al. 1971) and λ235 = 9.8485E-10 (Jaffey et al. 1971).
b Corrected for initial Th/U disequilibrium using radiogenic 208Pb and Th/U[magma] = 3.50000.
c % discordance = 100 - (100 * (206Pb/238U date) / (207Pb/206Pb date))
d Th contents calculated from radiogenic 208Pb and 230Th-corrected 206Pb/238U date of the sample, assuming concordance between U-Pb Th-Pb systems.
e Total mass of radiogenic Pb.
f Total mass of common Pb.
g Ratio of radiogenic Pb (including 208Pb) to common Pb.
h Measured ratios corrected for fractionation, tracer and blank.
i Measured ratio corrected for fractionation and spike contribution only.
