# Supplementary material for: Geochronological and geochemical effects of zircon chemical abrasion: insights from single-crystal stepwise dissolution experiments
Source: Copernicus journal article supplement (doi:10.5194/gchron-6-1-2024), 2024-01-09
Supplement: Supplementary file 1 [file gchron-6-1-2024-supplement.zip › Table_S2.xlsx]

## Sheet: AS3
Table S2. AS3 ICPMS major and trace element results.
	Concentration in mineral (ppm - parts per million)																																												Concentration in 1 mL solution (ppt - parts per trillion)
Fraction	Y	Zr	Nb	La	Ce	Pr	Nd	Sm	Eu	Gd	Tb	Dy	Ho	Er	Tm	Yb	Lu	Hf	Ta	Th	Ua		Y (2σ)	Zr (2σ)	Nb (2σ)	La (2σ)	Ce (2σ)	Pr (2σ)	Nd (2σ)	Sm (2σ)	Eu (2σ)	Gd (2σ)	Tb (2σ)	Dy (2σ)	Ho (2σ)	Er (2σ)	Tm (2σ)	Yb (2σ)	Lu (2σ)	Hf (2σ)	Ta (2σ)	Th (2σ)	Ua (2σ)		Y	Zr	Nb	La	Ce
180 °C Experiment
Zr10_L1	1568.08	485008	14.5944	24.3973	221.744	28.7156	162.497	76.0135	15.4102	95.4198	19.9678	176.626	55.6052	246.091	46.3054	408.465	76.8049	9057.49	1.48511	342.321	1598.21		35.6185	11522.4	1.54787	4.77376	7.13156	4.61021	8.05732	3.44037	1.34771	8.08849	2.45816	8.28027	4.46349	16.1815	1.25509	23.0901	3.19487	277.835	0.680822	9.2552	43.2102		897.272	277527	8.35108	13.9604	126.884
Zr11_L1	2893.63	481113	25.5378	75.3711	521.72	59.3181	287.715	137.375	9.27773	194.723	40.4602	339.648	102.638	429.302	78.9524	649.677	118.035	9968.02	1.77884	600.172	1016.32		133.747	14751.7	1.0718	2.16641	14.5676	1.70408	8.28475	3.6496	0.215196	5.84703	1.82443	10.6171	2.25091	10.9197	2.76608	22.7556	3.83667	319.749	0.12595	16.7579	28.3775		13211.3	2.19659e+06	116.596	344.117	2381.99
Zr14_L1	1960.14	483484	2.15236	7.13767	60.2892	1.50762	21.2543	14.7565	7.32327	56.1515	20.3529	215.751	71.7381	309.396	61.3812	502.521	88.8997	10259.3	0.342866	501.487	830.89		99.5375	17234.4	1.88054	11.4383	12.597	10.9018	11.5468	4.5252	1.44332	9.46715	4.62884	8.70273	4.99296	14.9241	5.81574	29.4657	6.38945	439.523	1.38653	14.9285	24.7343		466.122	114972	0.511832	1.69734	14.3368
Zr17_L1	905.466	485888	1.24745	9.62683	94.4357	6.90723	49.8939	26.793	10.9272	50.9922	10.2853	93.3863	29.7003	131.063	24.8943	216.796	42.3332	9896.06	0.157166	157.304	815.29		49.2857	29739.5	1.54023	8.36891	10.9099	7.96638	9.02193	3.32574	0.805772	5.80058	2.06776	16.9855	2.22992	5.97416	3.87802	25.5672	4.86143	609.817	1.02388	9.35252	48.4732		294.582	158077	0.405844	3.13197	30.7235
Zr18_L1	715.365	485337	6.67372	9.24803	67.3616	7.42291	45.1483	25.0682	18.1332	42.42	9.29965	82.3445	24.5663	105.447	20.0562	179.26	35.57	10746.3	1.15077	168.373	522.629		49.7928	32248.7	1.09323	3.24655	5.23303	3.07827	4.2931	1.83328	1.48272	4.31036	1.7085	10.0801	1.6108	9.64068	1.80978	18.434	1.98223	683.509	0.450294	13.1152	40.7095		609.551	413548	5.68656	7.8801	57.3977
Zr23_L1	2766.01	482308	3.54466	10.0118	137.881	11.747	70.2071	42.758	20.8086	111.32	30.7129	311.217	100.446	420.558	80.1957	665.606	115.39	9830.56	0.550807	608.564	883.619		151.312	35405.6	0.414572	1.86743	8.31636	1.84677	4.19417	2.63358	1.76379	5.98852	2.33837	19.7478	7.43728	27.4126	5.47503	38.537	7.75963	564.529	0.2328	32.3071	46.909		4229.93	737571	5.42068	15.3106	210.854
Zr24_L1	1030.48	484443	1.76658	7.29161	73.7011	8.96397	54.2113	20.6912	11.2927	39.4719	9.48803	100.037	35.5422	162.343	31.4859	270.956	50.2617	10230.7	0.363424	1064.22	1723.29		30.1815	9119.82	0.351327	0.636045	1.5717	0.586441	1.48484	0.534731	0.507818	1.30356	0.524653	2.61051	0.718183	5.35276	0.782827	4.79308	1.27161	355.969	0.07682	22.5244	36.4738		4866.53	2.28783e+06	8.34285	34.4354	348.061
Zr28_L1	1274.96	481331	4.50996	39.2198	275.269	19.9467	104.862	40.1819	21.4752	62.1558	15.2519	141.061	46.4387	197.114	40.9661	350.64	70.0377	10620.8	117.664	2872.37	-		70.1464	22568.6	1.66959	13.2769	18.1849	12.5341	14.753	6.64893	3.14838	2.89363	1.40649	18.2734	6.08298	12.1444	4.69267	14.5225	5.80477	630.824	7.56505	164.437	-		264.046	99684.2	0.934018	8.12245	57.0085
Zr60_L1	2740.81	480624	10.0028	44.6607	348.98	39.964	239.114	88.8759	30.6037	158.159	36.487	344.514	104.638	433.773	80.8268	659.707	116.072	11031.1	2.98839	510.423	1007.02		57.5939	12790	2.38869	3.06051	7.99575	2.63727	7.48565	3.06254	1.60525	5.53497	1.68864	11.9048	2.76808	11.8782	4.95863	17.3294	3.11101	328.842	0.573917	16.5033	32.5595		3971.98	696521	14.4961	64.7223	505.741
Zr61_L1	2493.35	480928	14.3133	42.3506	429.864	42.0669	268.638	96.0828	34.1164	171.406	34.0836	265.616	85.3983	361.634	62.1532	510.83	96.5356	11335.7	2.21172	371.25	517.157		138.04	11967.5	7.93505	30.5042	33.4447	29.6827	37.441	11.1281	1.77829	23.2262	9.004	49.917	12.9199	22.2525	4.58588	38.0165	7.51203	352.459	4.01849	19.8484	27.6491		228.987	44168	1.31452	3.88944	39.4783
Zr62_L1	1971.36	481812	8.52574	17.5767	173.863	15.1149	99.4986	47.5111	16.1569	99.6558	23.1132	220.788	71.7277	305.744	56.6509	457.119	86.1317	11743.5	3.23256	416.584	767.122		75.0348	21983.6	0.689058	1.04623	7.07153	1.00642	5.41319	1.99441	0.551718	4.42404	1.38931	8.91684	3.29904	13.6296	3.43235	21.7614	3.99801	514.529	0.250067	14.9361	27.5042		8850.74	2.16317e+06	38.2776	78.9133	780.583
Zr63_L1	1936.62	477435	3.9589	29.9424	189.09	22.9583	143.99	59.4594	31.9716	113.26	25.0521	227.637	70.3317	285.878	51.6582	400.783	71.7708	9574.97	1.89143	6970.27	13490.3		115.987	21606.3	0.769882	2.37131	11.9073	1.93354	8.08909	3.94557	2.33741	8.37284	1.8277	10.9428	4.61189	14.5571	2.38827	23.5897	5.19241	482.449	0.290569	459.761	889.827		4947.68	1.21975e+06	10.1142	76.4972	483.09
Zr64_L1	836.162	482884	5.30795	12.0523	77.1642	8.61807	51.3189	22.0335	6.50161	41.0348	10.3165	100.405	31.1726	139.198	26.9333	227.639	42.8923	12858.5	3.32799	261.018	819.693		29.2719	15686.7	0.956656	1.44149	3.44427	1.37584	2.89121	1.04689	0.295055	1.79114	0.704047	4.80851	1.69117	5.07286	1.10974	13.1144	1.67491	495.213	0.432726	9.11479	28.6238		1882.76	1.0873e+06	11.9517	27.1378	173.748
Zr69_L1	2803.68	481696	7.24314	13.2226	93.5875	11.7035	81.4687	39.9828	9.95228	111.102	28.3191	302.498	101.482	433.133	80.5063	641.639	118.164	10415.9	2.43318	653.829	1012.05		147.408	20841.8	1.02502	1.8781	5.3102	1.75085	4.62017	2.83026	0.643195	7.68375	1.98828	14.9799	6.12816	22.0646	6.49379	31.4509	6.7119	528.479	0.241121	38.4948	59.5854		4954.54	851233	12.7998	23.3664	165.384
Zr70_L1	3064.61	477221	17.5586	3.51678	29.4376	1.23773	8.304	10.0946	0.774979	54.2921	20.3259	264.714	105.851	537.647	117.33	1049.35	213.768	13502.3	12.9744	1410.59	3333.59		95.9916	15129.9	1.37405	0.942938	1.52903	0.895141	1.01624	0.814796	0.0968183	2.44394	1.22727	11.2692	4.65928	20.8466	5.282	39.8914	7.4807	558.501	1.21577	47.927	113.264		9338.45	1.45418e+06	53.5042	10.7163	89.7019
Zr71_L1	1052.31	483554	5.34779	21.7303	124.252	16.2637	95.1484	33.3414	14.9546	58.0571	11.2983	108.281	35.1401	150.023	28.8015	241.263	45.3901	11775.7	3.50774	271.284	818.301		103.415	42880.2	0.533453	3.28962	12.8166	2.72517	10.9285	4.37447	1.57424	5.60277	1.87359	14.5502	4.42945	16.2289	3.10815	26.9439	5.01898	1109.9	0.720338	27.1501	81.8955		2054.43	944042	10.4405	42.4241	242.578
Zr73_L1	1279.98	483795	15.8045	74.3708	241.09	20.6988	75.0856	16.4484	6.35348	37.8361	10.0665	115.167	41.8933	193.764	37.9457	310.59	60.5848	10643.4	10.0304	660.138	1773.82		82.8005	32434.9	5.00896	9.14349	16.6651	8.80287	9.93488	3.26872	1.36982	3.5926	1.09788	14.0519	2.32747	20.2269	4.3049	25.9462	9.12922	760.484	1.97065	44.5349	119.668		430.427	162689	5.31469	25.0092	81.0731
Zr10_L2	5605.1	476279	3.11975	6.53025	108.246	15.0542	116.765	84.8656	15.4446	204.022	57.8928	611.744	210.432	951.048	182.372	1502.21	275.429	10495.6	0.322557	920.763	1918.91		279.275	20211.6	1.6141	10.5286	12.0499	10.0533	11.9275	6.58827	1.65567	12.4167	3.27817	28.0869	8.24841	50.7804	15.4637	80.6054	9.72197	358.059	1.27971	36.9977	77.105		1447.89	123031	0.805881	1.68687	27.9617
Zr11_L2	2103.08	482878	3.9731	32.0771	90.917	24.8041	124.401	61.471	3.90556	99.7358	23.2799	226.165	73.8921	332.978	66.7906	582.417	111.993	10358	0.79961	447.4	913.068		124.448	27425.1	1.04172	3.71794	6.56459	3.44481	6.78788	3.75474	0.495045	4.09569	1.94014	13.9404	6.68826	21.4611	5.23599	36.2982	7.33277	547.006	0.416299	20.4008	41.6346		1683.51	386543	3.18046	25.6777	72.7789
Zr13_L2	1638.36	484126	1.12152	0.20613	13.3432	0.451944	10.2681	11.4988	2.99421	42.4742	14.0694	155.392	55.428	261.118	51.4267	441.613	80.2116	10386.2	0.1161	353.476	667.302		113.1	19561.5	1.03123	5.16475	5.71565	4.94299	5.25424	1.69239	0.305767	3.10606	1.50229	18.0324	4.42551	17.4112	4.87643	27.9321	3.41737	347.709	0.624515	18.6016	35.1166		863.048	255026	0.590791	0.108584	7.02886
Zr14_L2	1477.12	484366	3.37713	14.4928	18.8507	13.0782	20.6834	11.032	1.52437	40.7142	12.1764	150.669	54.6666	241.837	48.6071	383.593	74.5219	10287.2	186.732	239.506	414.053		74.3537	14219.9	1.79754	21.2561	21.025	20.5676	19.7	5.57007	0.478181	5.43111	1.84079	17.928	6.88872	18.2855	5.90848	23.8136	9.53765	427.767	14.1218	10.2892	17.7877		320.747	105177	0.733326	3.14703	4.09332
Zr17_L2	1130.95	485318	0.297937	-3.8696	1.98135	-3.53335	2.99657	6.69255	1.94399	31.5504	9.85099	110.585	40.1952	190.709	36.76	332.519	61.017	10226.7	-0.386087	151.263	452.737		60.8481	11683.7	2.01771	13.9994	15.1098	13.3477	13.9731	3.59414	0.393951	8.01847	1.40794	19.2941	2.02126	21.9964	2.44675	25.6104	7.24141	389.172	1.69487	11.4408	34.243		219.449	94171.1	0.0578117	-0.750857	0.384461
Zr23_L2	1426.03	484646	1.95614	2.76928	17.3056	3.30241	22.4863	15.173	5.85517	44.6772	13.8556	148.844	51.9212	236.434	47.608	412.769	75.615	10171.6	0.75347	301.063	490.002		49.4577	11673.1	0.485476	3.95775	4.3699	3.75341	4.74288	1.59767	0.684563	3.24127	2.56541	4.75654	2.63581	11.4729	2.235	13.4868	3.19621	289.24	0.47777	9.62834	15.6708		989.111	336156	1.3568	1.9208	12.0033
Zr24_L2	2050.31	482285	1.57222	8.74157	22.716	9.5899	71.4423	30.3332	16.2361	71.6703	19.2804	200.845	72.3421	330.932	66.6639	555.295	104.324	11008.1	-0.0931976	720.597	1312.71		58.8974	12925.5	1.64239	8.44763	9.24642	8.08756	8.99554	3.18033	2.03168	2.62893	1.71179	18.6118	5.53511	13.8449	4.1346	25.5307	6.84692	391.888	1.01445	32.2548	58.7587		660.318	155324	0.506346	2.8153	7.31589
Zr28_L2	1439.99	484569	2.71585	0.136683	5.37158	-0.619827	19.7422	13.4872	6.29012	44.5814	13.2877	149.498	52.1142	240.279	47.2505	405.855	77.1479	10195.4	1.88361	362.793	999.574		76.7003	20021.2	3.31097	15.8142	17.0443	15.0744	15.9122	5.70141	1.73273	5.11109	4.39501	19.9	3.06947	22.0325	5.18752	19.7595	8.47946	375.228	1.9585	13.785	37.9807		247.449	83268.8	0.466695	0.0234877	0.923058
Zr60_L2	4479.26	477206	2.3666	16.3159	186.187	19.7143	134.526	75.3388	31.4424	169.472	47.1274	445.068	145.717	613.369	119.484	910.418	156.748	11915.1	0.309155	972.047	2597.04		117.093	9380.56	3.24367	17.1121	19.8031	16.3639	18.4376	6.76558	3.67947	10.7634	1.91179	34.178	5.27084	29.0421	7.85049	46.9466	10.0476	409.86	2.07015	30.5672	81.6669		712.269	75882.8	0.376324	2.59447	29.6065
Zr62_L2	3974.09	478629	2.78419	16.7823	156.082	18.4733	127.462	68.7804	25.5391	163.493	41.3003	415.663	137.487	600.448	117.361	968.913	181.332	11063.2	35.3594	901.986	1925.55		123.07	18596.8	2.59494	5.83113	7.94818	5.61721	8.1196	5.4281	1.16427	5.60272	5.12597	18.82	5.64767	36.1927	3.64368	56.4199	9.14769	386.399	2.32384	27.3239	58.3307		1873.53	225643	1.31257	7.91178	73.5827
Zr63_L2	3905.1	467421	3.64955	27.6455	91.4335	22.8958	119.183	57.119	32.9972	144.481	40.0032	395.196	132.996	564.538	105.469	829.371	149.609	9882.12	128.739	13592.6	26922.4		64.504	10367.7	2.53149	15.6353	17.8328	16.1382	16.7751	8.37764	1.84457	10.8308	4.44351	18.687	6.47909	45.4902	6.63208	45.1629	14.8071	407.011	6.08401	293.61	581.543		873.428	104545	0.816271	6.18329	20.4503
Zr64_L2	936.645	483804	4.6624	7.95989	32.5507	7.62941	20.5296	10.451	2.50306	26.3561	8.28932	92.6406	32.4349	157.221	31.8945	292.096	57.5469	11835.4	2.72954	282.894	727.34		40.3013	19470.1	1.27821	8.49914	9.60002	7.9444	8.22182	2.70508	0.686069	3.11422	1.53107	5.41023	2.99247	7.42237	1.58224	18.7046	2.44443	464.133	0.847756	17.644	45.364		467.477	241465	2.32699	3.97275	16.246
Zr69_L2	1381.77	484273	4.66295	4.13139	21.6857	4.19513	14.0571	8.56151	1.59965	31.1002	10.6307	122.204	45.7043	222.23	47.477	416.086	81.8941	10548.6	38.101	368.309	688.589		81.3676	29219.5	1.2071	6.87867	6.32151	6.43346	6.92598	1.65576	0.54275	2.30594	1.76983	12.9864	3.16397	11.4087	3.06103	29.5099	7.37328	768.68	2.86058	27.024	50.524		725.471	254258	2.44819	2.1691	11.3856
Zr70_L2	1947.75	481531	10.1835	-0.747209	8.65304	-1.62807	3.56694	6.68819	0.490578	41.2122	15.8527	189.195	68.6416	341.152	71.1617	578.335	114.353	12263.5	5.94881	451.072	1136.94		135.541	25013.1	2.03218	16.2945	17.653	15.5943	16.1882	4.39603	0.4544	8.03365	2.5946	27.4133	4.61846	44.5988	6.36459	45.4734	13.7122	498.122	3.28336	23.9961	60.4831		325.375	80440.3	1.70117	-0.124822	1.4455
Zr71_L2	1257.92	485067	3.6864	5.94645	26.3283	5.00998	29.7175	13.997	6.10924	40.9776	11.1778	118.097	43.1667	195.381	39.7774	343.608	66.3615	10104.5	1.73015	265.275	488.649		36.6542	14516.3	1.19952	4.35705	4.47154	4.01003	3.91081	1.5098	0.384831	2.05891	1.76564	4.52229	2.80622	4.44608	3.11713	20.102	2.65386	345.352	0.547548	11.4784	21.1438		902.239	347914	2.64407	4.26508	18.884
Zr73_L2	1807.93	482705	8.8123	40.6204	38.7545	16.1596	37.202	14.0357	2.68537	47.3347	15.4226	165.717	63.6661	294.682	58.4731	483.238	97.4516	11351.5	4.54734	393.021	791.084		76.5362	16368.1	5.09164	23.8123	23.7576	23.0788	24.8903	5.18533	0.73495	5.54675	3.73441	35.7453	5.91221	18.2494	4.41142	28.4432	8.6221	477.509	2.33774	12.6331	25.4283		289.545	77306.7	1.41132	6.50548	6.20666
Zr10_L3	2597.98	482014	9.12509	8.40037	57.2586	12.1345	89.7776	42.4203	6.67892	92.1602	25.0563	274.259	97.347	438.681	85.829	699.355	137.703	10537.2	4.25281	416.292	835.566		174.053	30572.5	7.03575	25.9845	28.5357	24.7522	29.0604	8.42428	1.36965	11.333	4.27427	51.5839	9.05971	30.7001	8.92966	60.8074	9.42943	602.184	3.60095	24.9645	50.1078		279.119	51786.2	0.980373	0.902511	6.1517
Zr11_L3	899.38	485424	7.66642	17.7642	31.6598	8.70812	39.9045	12.883	0.693466	25.3936	7.1166	83.36	30.1384	147.442	32.6932	318.711	64.0608	10313.3	4.08205	177.242	352.399		39.0241	17122.2	1.68512	3.11286	3.92017	3.32119	3.83395	1.19025	0.173515	1.69533	1.42613	6.39425	2.20907	8.83381	3.06582	16.6149	1.96757	293.368	0.497598	10.6139	21.103		835.741	451076	7.12395	16.5072	29.4195
Zr13_L3	1362.63	484822	2.99765	3.64569	16.8445	3.56497	12.4421	9.55497	1.76385	35.4826	11.9726	134.963	48.9186	220.783	45.031	369.247	68.6352	10221.9	1.45545	251.934	467.978		43.4777	7426.85	0.794326	5.60931	6.16749	5.30837	5.32891	2.25357	0.192028	3.98296	0.900398	4.41253	1.87106	16.3731	2.89882	19.7172	2.33656	345.244	0.686188	10.4442	19.4005		802.536	285541	1.76549	2.14717	9.92073
Zr14_L3	1488.35	484547	0.812477	-3.85157	0.327834	-3.64907	-0.162532	6.44931	0.864991	37.7912	13.7337	160.132	53.8771	243.352	48.6598	407.735	74.8083	10339.5	-0.0524742	230.677	400.428		91.3473	19541.6	1.50042	12.8633	13.8779	12.261	12.7911	3.44	0.487763	4.03155	3.88743	17.0322	5.56683	18.0167	2.37825	24.3169	3.87078	413.285	1.56987	14.7884	25.6709		314.32	102330	0.171584	-0.813399	0.0692339
Zr17_L3	1032.06	485589	1.08222	-5.18114	-0.538791	-4.66375	-2.03508	3.55164	0.832169	25.2309	9.84766	94.3036	36.2881	168.683	35.8483	306.675	55.7512	10170.4	0.561251	127.789	366.163		67.6513	12771.2	2.60063	18.8318	20.3429	17.9541	18.7039	4.8214	0.538129	5.78152	2.86078	10.3326	7.03784	17.2251	4.2035	36.1324	9.49231	313.544	2.29463	6.0492	17.3332		149.002	70106.1	0.156244	-0.748018	-0.0777871
Zr18_L3	2375.92	482303	2.72304	-0.972011	40.3521	-0.0481611	16.7542	19.4576	13.1992	68.392	22.1885	244.54	88.1654	381.926	75.033	649.15	121.006	10824.3	0.123201	400.406	854.405		63.4558	11623.8	1.63822	8.33626	9.27506	7.94878	8.39899	2.46029	0.656956	2.45492	1.73854	10.6195	5.51819	16.7914	6.38483	22.0391	6.49151	299.309	1.02724	13.0362	27.8173		774.208	157162	0.887319	-0.316736	13.149
Zr23_L3	1559.42	484300	1.73724	-0.982426	7.76766	-0.495634	6.73133	9.21195	2.77313	38.4009	13.4241	157.961	55.3478	254.188	51.7186	447.469	80.0866	10371	0.0219254	290.64	483.103		71.8417	28755.4	0.826065	5.93351	6.49527	5.65621	5.98453	2.6514	0.501357	3.53887	1.30389	10.3287	5.15014	17.4336	2.30051	24.1835	4.28527	507.902	0.722065	16.7118	27.7785		714.134	221784	0.795567	-0.449901	3.55719
Zr24_L3	1468.47	482823	0.57723	-2.43545	10.5672	-0.693304	19.3425	13.8043	7.76017	44.9609	12.3227	146.954	50.3271	236.122	47.46	411.254	80.0203	11891.5	0.176884	384.478	739.263		83.6235	14114.7	2.349	16.4785	17.8047	15.7405	16.411	5.16528	1.22255	7.119	2.75421	21.3276	5.33334	11.7336	3.60133	29.0252	5.30006	305.308	2.01822	22.9233	44.0763		242.359	79686.2	0.0952673	-0.401952	1.74404
Zr28_L3	1779.26	484406	2.58237	-3.59716	0.473504	-3.36484	5.89721	9.88751	1.79623	51.0027	16.0087	194.888	67.5624	308.527	59.1345	484.47	88.0602	9944.01	-0.224258	234.046	484.803		86.6239	22745.1	2.21294	18.412	19.8358	17.5568	18.3394	4.91769	0.557203	8.66272	5.48087	15.304	6.93029	20.2793	10.3895	53.2569	4.70267	522.704	2.23168	11.5597	23.9447		262.789	71544.5	0.381405	-0.531284	0.0699344
Zr60_L3	2648.33	480894	5.4733	22.5182	128.926	21.3867	141.58	62.9793	23.0209	130.006	33.7033	326.55	101.687	430.423	83.9749	656.503	113.978	11441.7	1.60818	377.861	977.397		105.269	23957.8	2.29061	11.8599	13.2453	11.2377	18.7539	6.13084	2.07507	15.7999	5.1818	34.9839	7.81578	27.7919	7.55543	35.3729	5.22026	461.275	1.4842	18.5984	48.1078		655.667	119059	1.35507	5.57501	31.9192
Zr61_L3	1800.38	483369	4.06023	-0.552446	12.0554	0.92144	12.4625	9.58693	1.54154	42.8685	13.8702	161.137	62.0675	295.547	56.9106	494.924	92.4308	10904.7	15.5575	296.711	567.64		120.983	17643.8	7.31933	38.9143	40.9368	37.0029	37.6678	9.69005	1.20901	13.2612	7.49364	40.8487	11.0809	23.2544	7.04493	72.3419	8.6825	509.436	5.55973	15.4309	29.5209		132.434	35555.9	0.298665	-0.0406371	0.886776
Zr62_L3	6170.14	475163	3.80837	39.5929	206.456	41.2764	245.462	131.355	45.914	305.031	73.825	704.909	230.742	961.357	170.016	1305.71	233.567	10572.8	2.13241	1039.16	2331.44		196.411	12404.1	4.30757	11.6322	12.5812	11.942	9.9876	7.55423	2.08167	14.4489	4.56493	31.8757	11.2271	31.0327	6.97638	51.5699	13.0634	279.023	1.45291	23.5623	52.8637		2147.32	165365	1.32538	13.779	71.8505
Zr63_L3	2129.84	479968	3.32446	5.13656	44.4094	5.15601	41.7281	26.7137	13.4179	77.9884	21.8679	226.851	78.1163	339.978	62.8808	510.628	93.9433	8678.04	1.15233	5317.1	9844.41		98.9152	24148.3	1.33434	4.68272	5.61435	4.46402	4.95707	2.37708	0.865759	4.68165	1.46506	12.6099	3.45947	18.9023	3.60308	24.5138	5.38839	314.176	0.80073	201.186	372.488		1238.65	279136	1.93341	2.98728	25.8273
Zr64_L3	1249.96	483691	2.25701	-0.911026	16.7711	-0.344377	8.8162	9.88247	3.16324	33.4637	11.5041	124.32	43.9558	210.038	42.518	370.542	68.9128	11441.1	1.92922	317.064	773.858		65.9026	31372.8	1.24101	7.49683	8.13516	7.14709	7.64395	2.28675	0.573463	2.58354	1.21125	11.9191	2.80557	16.4435	3.43201	23.0999	5.42326	549.225	1.01519	21.9931	53.6785		453.311	175416	0.81853	-0.330394	6.08221
Zr69_L3	2506.05	482113	5.91995	5.41858	31.5712	6.06798	33.1174	21.9301	4.40228	75.3406	22.1615	252.336	89.4706	403.498	78.872	640.318	117.522	10763.5	1.4042	474.17	862.093		76.0497	8228.57	2.5123	7.23535	8.68717	7.17535	7.86291	2.38133	0.509645	4.74965	2.00677	17.5242	3.96392	16.3739	3.15176	37.0866	6.05246	303.338	1.0264	17.8819	32.5113		1121.06	215670	2.64824	2.42396	14.1232
Zr70_L3	2551.18	481034	9.28617	12.9573	19.9845	11.0673	17.2351	13.8027	0.393411	60.0471	20.8149	259.365	95.9402	444.084	86.8296	685.122	133.88	11679.4	5.17466	505.097	1138.9		137.97	24644.2	8.3509	25.6624	25.8916	24.4694	28.0101	6.2389	0.311955	12.5441	6.06726	39.0865	10.6865	31.8533	6.87562	37.2518	7.8111	500.528	2.76577	26.1667	59.0009		320.087	60353.5	1.1651	1.6257	2.50737
Zr71_L3	1844.67	484379	3.23879	7.81812	38.8262	7.35013	40.1454	20.7941	8.52623	62.2026	16.1664	172.526	61.1306	282.362	55.0248	468.815	87.9972	9760.12	1.96817	327.243	591.681		59.0753	15809.1	2.17361	5.70987	6.24981	5.04175	5.68308	1.74034	0.578361	5.02431	1.66366	12.1506	3.95502	8.08164	4.25481	24.6077	3.68982	323.265	0.865535	13.8142	24.9771		1178	309322	2.06827	4.99261	24.7942
Zr73_L3	2847.48	481758	8.74574	8.68393	19.6383	-1.71035	9.93085	12.4939	1.47093	64.8682	23.0298	264.631	97.4247	462.848	91.4339	760.835	146.194	10655.2	6.7911	407.69	786.894		86.5312	11267.9	8.31471	16.4458	17.6257	15.6144	16.3479	4.941	0.709422	8.52691	1.92259	31.7146	5.27273	37.4917	7.36976	49.7099	10.8246	452.188	2.42423	19.4785	37.596		473.777	80157.2	1.45516	1.44487	3.26751
Zr10_R	1842.13	484444	6.84042	3.465	23.6995	4.67156	30.6536	17.7368	2.34469	56.3495	17.3889	192.388	70.2118	311.262	61.6351	501.4	96.4145	9726.86	3.19379	233.702	449.813		58.9796	10786.4	2.26042	5.43148	5.78111	5.14778	6.08873	3.37575	0.504567	4.46753	0.83988	11.2316	5.27116	17.4153	4.41089	34.8119	2.81975	253.025	1.11196	10.5704	20.3453		986.608	259458	3.66359	1.85579	12.693
Zr11_R	1814.1	483607	2.96845	2.96474	19.297	3.14128	18.7666	15.4511	0.897153	51.724	16.9397	190.626	68.5485	312.919	61.6155	518.551	95.4634	10602.4	0.486209	242.622	469.279		42.9113	12293.6	0.27201	0.461571	0.82609	0.440751	0.794745	0.535227	0.0884704	1.8751	0.729395	5.39115	1.46054	8.65772	1.32888	13.3761	1.78887	243.306	0.0687939	9.47346	18.3235		10977.8	2.92648e+06	17.9632	17.9407	116.773
Zr13_R	1604.14	484204	1.21542	0.00842827	5.88526	0.219303	3.56815	8.11957	0.768876	41.2295	14.7845	165.249	59.1478	268.165	51.3614	421.43	75.284	10456.1	0.197212	265.566	454.781		125.695	35382	0.188964	0.459773	0.69556	0.439408	0.515751	0.685247	0.0668729	3.16091	0.990656	11.7339	3.75766	19.5365	3.26697	30.219	4.90748	727.23	0.058058	19.0666	32.6515		9478.61	2.86109e+06	7.18173	0.0498015	34.7752
Zr14_R	1007.51	485943	1.22763	-1.01343	2.40848	-0.883902	0.0693721	3.04156	0.216434	20.8443	8.03735	99.085	36.6277	173.271	35.1609	303.751	56.2171	9808.27	0.079607	149.376	293.88		40.698	20168.5	0.668903	3.14093	3.3899	2.99408	3.12643	0.943724	0.147466	2.38627	1.18842	6.86254	1.48323	12.6413	1.67791	13.3103	3.30472	432.835	0.378351	5.99522	11.7949		871.356	420273	1.06173	-0.876473	2.083
Zr17_R	1299.46	485713	1.15059	-0.159782	4.12958	0.0829902	2.89246	7.00518	0.428336	34.1781	12.0426	134.188	47.9297	214.441	42.3053	355.722	65.9561	9576.84	0.145859	133.947	247.99		39.9696	16234.1	0.139989	0.64362	0.716752	0.614175	0.658802	0.402179	0.0609791	1.59575	0.989617	5.03394	1.41312	7.13082	1.54929	12.2226	2.16659	335.793	0.0840627	3.33934	6.18248		5486.09	2.0506e+06	4.85762	-0.674575	17.4344
Zr18_R	1853.97	483488	2.72844	0.535005	18.076	1.17827	12.8023	14.7726	8.48514	55.3303	17.8476	197.436	69.0176	312.549	60.5226	507.712	94.3596	10667.9	0.445951	262.136	568.104		73.1887	24512.1	0.708272	2.28316	2.57146	2.18091	2.46661	1.25445	0.431823	2.91228	1.40459	9.18696	2.78172	13.1005	2.64195	27.7774	4.10801	435.394	0.307369	10.2374	22.1866		2206.97	575546	3.24794	0.636872	21.5177
Zr23_R	1820.25	483767	1.41465	0.184032	8.37453	0.492636	5.21563	9.60824	1.54573	47.2009	16.6103	187.729	65.8448	294.692	56.752	467.777	83.848	10531.8	0.242268	279.767	476.933		125.243	29117.6	0.486598	0.627136	0.947579	0.604368	0.756118	0.988164	0.204437	2.44958	1.21649	11.8516	5.59308	20.3589	3.92434	33.0676	5.0417	568.662	0.0848419	19.8486	33.8369		7889.53	2.0968e+06	6.13154	0.797652	36.2979
Zr24_R	1089.31	484474	1.33318	-1.80608	4.71646	-1.2671	2.10693	5.13282	1.09577	23.63	8.60535	98.907	36.8996	174.949	37.4242	318.001	60.7674	11040.9	0.105546	270.803	526.722		51.3433	20750.4	1.08184	6.99799	7.56772	6.67483	6.96371	2.044	0.397142	3.18338	2.2646	13.9803	1.96704	12.1397	3.68041	20.8464	7.42533	449.086	0.847937	12.8576	25.0085		423.076	188164	0.517792	-0.701463	1.83182
Zr28_R	1749.79	485569	2.48787	-0.337335	5.38123	-0.100143	3.47792	8.42429	0.404708	45.65	15.8943	185.865	65.3533	292.479	56.5036	475.545	86.1883	8917.79	0.356765	166.289	296.412		88.7779	30871.8	0.382585	2.05047	2.22539	1.95491	2.06305	0.848695	0.0534463	3.40923	1.04724	9.48999	3.83802	20.5069	4.40806	25.0598	5.12197	451.582	0.261407	10.0917	17.9886		2319.72	643723	3.2982	-0.447209	7.13395
Zr63_R	1613.28	485368	1.0059	0.960581	8.31593	0.988699	8.08056	11.0356	2.36957	44.8273	14.7817	161.397	55.4991	248.103	47.6469	398.255	72.1445	8197.51	0.129201	1391.59	2272.66		51.9327	20608.4	0.180504	0.216996	0.376802	0.208709	0.368005	0.47123	0.120002	1.94647	0.549837	5.65571	1.85688	8.65627	1.51611	16.9343	2.71947	277.148	0.0270926	47.0488	76.8375		20478.2	6.16104e+06	12.7684	12.1932	105.559
Zr64_R	1111.64	484343	1.55852	0.141907	9.90853	0.421723	4.75016	6.37198	1.43836	27.5636	9.74817	112.213	40.8149	194.374	38.787	326.277	60.3226	11121.7	0.273781	234.507	554.059		42.2191	11372	0.598239	1.31562	1.56634	1.255	1.35053	0.395767	0.125635	1.07112	0.550522	7.18366	1.61486	7.26998	1.32271	13.3806	2.5764	333.288	0.17945	4.67964	11.0564		2300.72	1.00242e+06	3.22559	0.293699	20.5072
Zr71_R	1798.14	484433	1.09167	0.597607	10.1732	1.00906	8.91048	12.1061	2.74809	50.33	17.0058	184.669	65.3598	288.529	55.3197	455.954	81.9304	9919.28	0.195061	259.683	446.454		125.951	31077.7	0.256455	0.451248	0.842898	0.435167	0.781552	0.817467	0.178024	2.96204	0.95813	9.46343	3.66217	15.7151	3.14619	29.3143	5.02096	559.235	0.0558592	15.4292	26.5263		10942.8	2.94807e+06	6.64351	3.63681	61.91
Zr73_R	2015.93	483034	2.83544	-3.95458	4.34567	-4.0775	0.702078	7.62185	0.680457	48.49	17.2984	203.067	68.316	331.893	62.3162	530.89	100.694	11037.6	0.038863	187.669	364.401		94.6043	17235.7	3.19371	16.1162	17.3724	15.3704	16.0696	4.3893	0.414804	8.34248	1.62036	24.7282	5.29509	28.7516	4.99236	30.0039	8.31125	331.94	1.94587	10.2077	19.8206		339.86	81433.1	0.478017	-0.66669	0.732622
210 °C Experiment
Zr29_L1	887.218	486379	1.32286	1.79585	40.1707	3.2258	24.6505	12.333	8.63463	31.8781	8.21874	85.7345	29.9375	138.269	28.0056	249.593	47.5389	9420.59	0.245351	247.379	440.028		33.6344	17098.1	0.293382	1.55927	2.14989	1.48973	1.75416	0.917648	0.883601	1.3274	0.714369	3.58034	1.32924	5.62045	1.89019	10.3049	2.32845	322.405	0.194887	11.0437	19.644		1548.63	848967	2.30903	3.13463	70.1172
Zr41_L1	1475.87	483385	4.26023	14.1572	112.152	7.09526	38.0849	14.8315	3.94642	41.1633	12.9011	145.101	51.1137	227.865	45.0921	384.276	69.7207	10952.6	0.365318	660.668	1118.73		48.1034	11029.5	1.11235	3.86291	4.85352	3.66357	4.01525	1.05389	0.7139	6.9769	2.4738	17.1576	5.98846	23.8567	3.54879	23.6379	4.41816	478.141	0.465218	31.4723	53.2931		1047.71	343151	3.02431	10.0501	79.6158
Zr45_L1	1197.91	484178	4.39725	4.89972	72.9672	3.01226	15.3769	8.93529	2.01421	30.2171	10.2574	117.598	42.5743	197.859	39.3001	342.053	66.2599	10979.1	0.763415	332.775	621.085		55.745	23066.6	0.515207	1.53545	4.01027	1.45417	1.7148	0.860718	0.208284	1.89859	0.792362	5.64965	2.05247	11.4578	2.19509	16.0605	2.70087	492.633	0.194532	17.0214	31.7684		2142.48	865961	7.86456	8.76325	130.503
Zr49_L1	1086.77	484530	3.2127	-0.213778	33.4748	-0.911424	6.20145	8.23653	4.06188	27.8363	9.4128	110.427	39.2284	188.187	37.028	333.281	65.5426	10812.7	0.364851	351.007	803.945		55.8978	15387.3	1.10538	7.42274	8.21745	7.07456	7.49593	2.79125	0.35515	2.67748	1.31553	9.30237	2.70693	16.1768	3.17484	24.3537	5.00288	390.344	0.91715	12.0568	27.6149		397.995	177444	1.17655	-0.0782895	12.2591
Zr53_L1	1023.83	486917	5.2001	2.4583	54.2489	2.03414	17.5484	11.7536	1.28842	34.6639	10.0296	108.023	36.9714	169.035	33.9049	286.505	55.2358	8706.06	1.94943	168.561	318.107		34.5202	17306.8	0.661385	1.20771	2.0542	1.16125	1.51546	0.667385	0.133507	1.24996	0.357887	5.41022	1.88265	8.64181	1.62521	8.31567	1.46987	390.947	0.306687	5.40947	10.2087		2311.66	1.09939e+06	11.741	5.55048	122.486
Zr54_L1	843.547	486402	2.67648	15.9551	60.5496	4.96584	23.2845	11.7739	7.97368	28.5179	8.42977	86.246	30.1811	135.76	26.121	226.152	41.9057	9490.24	0.460537	199.146	355.617		31.2788	17679.1	0.525142	1.63989	2.31134	1.48139	1.73136	0.796026	0.553404	1.45969	0.848477	6.27648	1.32519	5.75049	1.19755	8.43704	1.36678	338.762	0.193738	7.07607	12.6358		1490.75	859589	4.72998	28.1965	107.006
Zr58_L1	1191.55	485337	1.57474	2.57971	33.3815	2.84616	19.0233	13.7713	7.32455	38.8168	10.8905	116.253	40.8939	185.797	36.2457	305.468	57.6873	9982.5	0.328906	262.06	515.468		42.3822	21054.9	0.287181	0.422894	1.20901	0.407459	0.761936	0.749622	0.294409	1.36557	0.645762	6.04256	1.31679	8.10637	1.58836	10.4809	2.50119	424.043	0.0527856	9.15189	18.0016		7917.09	3.22477e+06	10.4632	17.1406	221.8
Zr29_L2	1812.46	485044	1.13514	-1.5109	5.30757	-0.901382	4.07453	8.73504	1.33313	41.2652	15.0406	180.887	64.7997	293.23	58.5287	489.827	92.3749	9166.51	0.552263	368.417	635.152		44.1176	14537.1	0.736247	6.31791	6.82323	6.02255	6.39271	1.84008	0.176984	3.65193	1.78582	10.3075	2.98118	22.092	3.06476	34.3081	4.38389	274.459	0.766183	12.2951	21.1967		779.858	208702	0.488423	-0.650101	2.28372
Zr41_L2	535.898	486176	2.93992	-0.250321	7.01021	-0.265783	1.03275	1.82394	0.123079	10.226	3.77	45.3084	17.6726	91.2407	20.2425	181.101	36.6708	10407.5	1.35354	107.103	210.458		8.64303	9547.68	1.47985	1.85208	2.01797	1.76691	1.84865	0.600191	0.038926	1.29578	0.351749	3.62457	0.947264	3.99079	1.94401	10.1998	1.6001	392.892	0.295792	5.90219	11.5979		786.489	713515	4.31466	-0.367373	10.2882
Zr45_L2	1918.31	483228	6.48425	3.27665	17.7993	1.64916	15.9772	11.3447	1.44811	50.1795	16.8911	197.646	72.4212	329.955	64.492	528.511	101.56	10782.2	3.56635	294.01	586.831		43.75	11637.1	1.18471	4.10192	4.76715	3.90256	4.36877	1.57191	0.231356	3.71388	2.25548	10.5688	5.23032	27.6569	4.81964	37.3528	5.88709	267.56	0.703038	10.874	21.7041		1275.36	321266	4.31094	2.17842	11.8336
Zr53_L2	1889.69	485450	1.96627	0.0662205	7.02707	0.257108	5.9943	10.9279	0.668795	49.6703	16.6974	193.299	68.2977	313.954	61.2875	526.717	98.2504	8769.67	0.329146	181.469	324.31		78.534	17241.4	0.671744	1.45162	1.58263	1.38398	1.47599	0.701475	0.120398	2.34622	0.811482	7.63824	3.13623	8.39076	3.02346	19.4287	3.54593	234.874	0.184406	7.13874	12.7579		3539.86	909368	3.6833	0.124047	13.1634
Zr54_L2	638.611	486811	2.8091	-0.217966	5.94336	-0.403109	1.22617	2.22888	0.410592	12.693	4.86038	59.0942	21.8785	104.658	22.7877	198.717	39.5115	9607.23	1.41952	111.411	201.93		22.6998	18895.9	1.18317	2.29863	2.50518	2.1867	2.29396	0.672673	0.027963	1.12425	0.69728	5.50381	1.27077	6.0609	1.63638	6.75856	2.09566	305.332	0.358507	4.0488	7.33837		756.457	576645	3.32748	-0.258188	7.04012
Zr58_L2	311.175	486845	3.04381	-0.0528879	6.84189	-0.0584745	0.85739	1.07919	0.174305	5.34434	1.96856	25.3981	9.9828	52.0126	12.515	127.091	26.903	10133.7	1.3074	82.0867	157.424		8.43201	8130.45	0.568742	0.688192	0.788591	0.655577	0.68889	0.30943	0.0296038	0.327553	0.0840091	1.73766	0.405237	2.17368	0.521062	5.01827	0.904217	204.068	0.119785	2.41716	4.63557		1229.33	1.92333e+06	12.0249	-0.208939	27.0296
Zr29_L3	1901.42	483931	29.9578	-4.24066	7.37307	-3.50285	3.5868	10.2709	1.59063	50.6208	17.3335	203.21	69.4544	313.404	59.8055	483.875	89.3729	9867.84	268.958	345.051	605.046		80.1319	11362.6	6.79002	16.9932	18.371	16.1982	16.8903	4.93957	0.744967	7.72714	2.70665	6.43541	4.69546	18.5067	7.96	55.2158	3.43581	252.405	6.9048	15.9132	27.9038		303.999	77371	4.78967	-0.677998	1.17881
Zr41_L3	1235.61	484411	3.22131	0.253218	8.23634	0.194421	5.35352	5.60325	0.46141	27.7268	9.91353	114.34	42.9934	205.53	41.9663	360.736	69.1249	10892.1	1.26107	210.041	415.47		37.9423	11185.6	1.0437	2.68963	2.97257	2.56253	2.71045	1.09582	0.206153	1.56587	0.563619	8.60174	2.37733	10.2804	1.59162	20.2129	4.11175	248.886	0.461724	5.31071	10.5048		1249.18	489734	3.25671	0.256001	8.32684
Zr45_L3	1867.3	482449	2.22129	-1.01247	10.1681	-1.43643	3.81058	8.54354	0.856141	41.8946	15.7392	189.506	67.4235	316.494	60.7073	515.03	94.1948	11749.2	0.0368092	255.866	502.02		102.441	31244.5	2.03826	11.4323	12.377	10.9371	11.4098	2.92979	0.287793	3.24297	2.73433	23.2462	4.45543	28.9075	5.09392	41.2824	7.48366	781.361	1.39265	12.7199	24.957		444.676	114890	0.528974	-0.241108	2.42141
Zr53_L3	764.219	487308	2.09793	-0.486834	5.34091	-0.400181	0.725981	2.73816	0.142854	15.0874	5.79414	71.7489	26.5429	128.471	27.9207	276.15	54.708	8901.99	0.333607	55.019	97.1093		45.8627	15791	0.345945	1.60524	1.76433	1.53012	1.60586	0.516911	0.0213613	1.00177	0.575638	4.88015	2.19422	6.1232	3.14623	16.7266	2.39366	280.106	0.201224	3.41952	6.03549		1293.29	824674	3.55035	-0.823872	9.03845
Zr54_L3	1037.75	486315	1.20448	-0.597255	3.67367	-0.592223	0.986159	3.79531	0.718265	22.6376	8.37512	100.922	36.467	174.101	34.6578	295.833	55.7714	9399.58	0.0690177	155.997	290.893		57.2789	26391.8	0.981974	2.46199	2.65905	2.34659	2.44856	0.805704	0.179635	1.72625	1.94727	8.77859	2.45606	8.71224	2.1377	11.507	2.42919	388.639	0.302852	6.89888	12.8646		1145.14	536639	1.32912	-0.65906	4.05383
Zr58_L3	2084.91	484034	1.18861	0.139145	11.6809	0.533271	7.01443	11.1496	3.02771	51.0071	17.8737	205.833	74.7029	340.453	67.9916	576.878	107.034	9710.63	0.164444	339.341	612.309		86.8291	12780.3	0.357772	1.46511	1.6305	1.39581	1.54007	0.705803	0.166774	1.51059	0.789351	5.06526	1.44167	9.32022	2.1364	14.5315	3.38643	297.576	0.18698	11.0719	19.9782		3875.27	899687	2.20929	0.258632	21.7116
Zr29_R	1643.75	485394	5.03817	-1.89674	6.82149	-1.7499	4.67769	9.12137	0.790937	45.4501	14.8903	167.643	59.9696	268.568	53.072	428.284	78.8218	9194.84	0.934156	272.556	474.961		67.2035	14066.7	1.53497	8.81146	9.52575	8.40205	8.83343	2.99828	0.608386	4.87419	2.90383	16.2706	4.91382	13.7633	2.47861	17.6413	3.86185	387.688	1.11004	14.4604	25.199		506.791	149654	1.55334	-0.584792	2.10316
Zr41_R	1542.86	484357	3.03908	0.552842	7.21664	0.590637	6.8715	8.08014	0.616977	39.175	13.4494	155.737	56.8232	256.981	49.6105	406.453	74.3996	10434.4	1.29405	231.177	449.66		32.297	6342.55	0.8194	1.06231	1.21361	1.00908	1.17486	0.615464	0.0965588	1.35909	0.6083	5.47423	1.78322	7.9149	1.45772	10.1821	2.30414	192.375	0.276096	7.71054	14.9977		3964.7	1.24466e+06	7.80955	1.42064	18.5447
Zr45_R	1892.36	482741	10.8596	-6.38554	3.91969	-5.82493	0.257193	7.4633	0.34305	51.27	15.8616	204.208	69.733	321.223	61.288	501.725	92.7723	11452.4	2.97411	228.311	418.416		95.8261	22632.5	7.84709	28.7878	31.168	27.4444	28.6593	8.17053	0.469425	11.0107	6.79426	22.8848	6.74623	24.3484	6.26823	28.9041	14.0259	517.144	3.89647	14.6404	26.8307		178.571	45553.4	1.02475	-0.602566	0.369878
Zr53_R	2115.72	485052	1.95671	-0.0325538	5.85307	0.266422	4.4673	10.967	0.396973	54.583	18.893	213.21	75.4564	339.932	65.2729	545.743	99.8855	8869.59	0.321818	171.73	299.89		75.5713	19153.6	0.20083	0.296747	0.437615	0.283663	0.333098	0.460606	0.0542047	1.65608	1.0145	11.5593	2.97633	14.0607	2.67857	17.8718	3.38451	328.918	0.0442066	5.87247	10.255		19391.8	4.44577e+06	17.9344	-0.298374	53.6467
Zr54_R	1073.6	486346	1.11522	-0.253691	3.66641	-0.178301	1.17704	4.17776	0.396945	25.1332	9.16312	106.325	39.0702	177.1	35.0447	301.921	55.5931	9321.83	0.13659	144.68	263.057		47.7294	27575.8	0.279998	1.01954	1.13791	0.97182	1.03075	0.484053	0.0801186	1.58016	0.888995	6.01882	2.30897	8.239	2.16651	16.3123	2.33286	395.411	0.126078	7.06702	12.8492		2861.02	1.29606e+06	2.97194	-0.676058	9.77058
Zr58_R	1441.99	485347	2.86602	0.122434	8.59115	0.294841	5.17594	7.1173	1.03352	37.5118	12.5447	144.609	52.6694	239.542	47.3096	387.011	74.0149	9635.04	0.930528	200.142	376.323		46.7456	10897.7	0.661432	0.896451	1.16374	0.85404	0.905064	0.394579	0.144796	1.89992	0.881677	3.52669	2.43297	5.68735	2.10368	10.6255	2.60182	389.925	0.14614	6.6258	12.4584		4373.39	1.472e+06	8.69229	0.371328	26.056
a[U] calculated from the [Th] determined by ICPMS and the Th/U ratio determined by TIMS.
[truncated: 37 more columns]

## Sheet: SAM-47
Table S2. SAM-47 ICPMS major and trace element results.
	Concentration in mineral (ppm - parts per million)																																												Concentration in 1 mL solution (ppt - parts per trillion)
Fraction	Y	Zr	Nb	La	Ce	Pr	Nd	Sm	Eu	Gd	Tb	Dy	Ho	Er	Tm	Yb	Lu	Hf	Ta	Th	Ua		Y (2σ)	Zr (2σ)	Nb (2σ)	La (2σ)	Ce (2σ)	Pr (2σ)	Nd (2σ)	Sm (2σ)	Eu (2σ)	Gd (2σ)	Tb (2σ)	Dy (2σ)	Ho (2σ)	Er (2σ)	Tm (2σ)	Yb (2σ)	Lu (2σ)	Hf (2σ)	Ta (2σ)	Th (2σ)	Ua (2σ)		Y	Zr	Nb	La	Ce
180 °C Experiment
Zr21_L1	1035.65	483238	45.3831	46.5845	733.102	24.0059	121.9	58.5326	8.56612	99.1944	21.6948	173.283	41.6244	151.764	26.1449	226.15	43.5702	11450.6	1.96281	98.1962	193.146		30.0054	13003.8	7.44391	5.27215	23.3111	4.82538	7.77044	5.10027	0.353783	3.87357	2.28065	9.64813	1.92463	9.53653	2.59288	8.71134	2.39857	259.513	0.676509	5.96964	11.742		568.369	265202	24.9064	25.5657	402.329
Zr23_L1	1088.89	484201	67.8751	37.4111	310.66	19.7449	109.04	51.6722	8.93192	88.9228	18.5902	156.301	40.3503	149.431	27.4996	230.179	48.7599	10887.5	1.69643	101.345	135.049		65.5073	30573.4	8.76836	6.88598	17.2738	6.35077	10.1832	4.2861	0.704238	5.56141	2.7206	10.3517	3.68793	9.59849	2.25782	14.7363	3.20964	500.969	0.879738	5.50675	7.3381		448.657	199506	27.9666	15.4145	128.001
Zr30_L1	2532.59	478641	26.0042	61.6985	459.087	43.4414	233.215	122.842	19.5389	210.276	45.2704	339.581	88.1618	327.255	62.3644	552.654	112.471	13529.7	12.7984	225.549	505.669		88.09	16233.8	6.34712	4.02966	12.597	4.03158	10.6869	3.69605	1.32573	10.9786	3.02798	21.8252	3.7831	9.57938	2.9901	37.5262	5.89987	534.245	1.18329	5.64203	12.6491		1976.86	373613	20.2981	48.1599	358.349
Zr35_L1	2723.29	479182	28.1225	119.633	748.353	53.3961	289.344	138.793	21.3604	239.325	52.001	407.892	102.362	359.086	60.4884	490.489	96.7006	12376.4	19.8863	137.019	259.716		109.634	20309.7	6.50979	16.5992	33.2272	15.3662	21.8753	8.56814	2.2832	16.0144	4.19988	48.0788	9.51534	26.8426	5.34777	18.6501	7.23094	480.848	3.17506	7.15297	13.5583		462.389	81360.8	4.77494	20.3127	127.063
Zr39_L1	2433.15	478877	17.8966	71.1206	494.732	38.9186	207.254	96.8679	15.6983	169.368	36.4348	292.73	80.1202	332.994	68.8869	655.176	143.636	13343.1	5.42431	265.846	621.012		72.0495	11656.3	3.46327	7.8653	13.8335	7.06609	9.09552	5.06231	1.45686	14.4898	2.3503	12.8797	6.09444	13.9306	6.28796	30.7237	7.05725	408.823	1.35668	6.32005	14.7635		913.457	179780	6.71875	26.7002	185.733
Zr43_L1	979.235	483752	22.9917	16.9595	184.812	5.33626	56.1514	28.7991	4.19083	60.4192	12.3464	114.23	35.5221	156.999	33.4431	258.325	56.3335	11801	2.96848	64.1513	107.133		47.314	10569.2	6.75446	25.0586	27.8791	23.756	25.0572	7.00882	1.34744	6.17664	6.11304	19.7588	3.89527	21.3981	6.59904	31.9457	3.05333	475.405	3.92445	7.73562	12.9185		106.784	52752.5	2.50721	1.84941	20.1535
Zr21_L2	1600.85	483567	3.33457	32.1636	165.438	16.8575	93.8834	45.7649	7.69776	89.9505	22.5174	190.415	55.845	233.132	47.4916	448.564	93.6821	10748.1	0.899414	182.085	363.682		81.7889	29162.7	1.68622	8.71879	12.9565	8.21113	9.92132	3.59412	1.22241	4.92824	2.96529	17.9076	4.95762	20.2998	3.63888	35.9732	7.28937	505.96	1.07716	13.6339	27.2312		508.72	153669	1.05967	10.221	52.5733
Zr23_L2	1800.14	481784	6.32107	14.8888	155.326	6.7846	52.8492	29.4574	6.37551	70.1653	20.228	171.524	57.9434	267.972	60.0257	598.014	129.795	12079.5	15.2417	319.688	519.748		82.9433	15874.6	5.23553	18.3808	20.1383	17.5294	18.3786	5.8871	0.576391	6.7521	2.78749	21.7289	5.67369	20.8489	3.54893	24.9228	7.10418	421.222	2.59144	20.0393	32.5799		266.659	71367.6	0.936352	2.2055	23.0087
Zr30_L2	583.053	485043	19.7264	6.81186	45.818	2.05508	14.7169	6.33361	1.14662	16.691	4.66409	51.0595	18.1135	95.0786	22.6082	237.2	53.4714	11312.8	1.62059	109.822	213.682		22.6849	16759.5	3.67573	5.24675	6.67055	5.00542	5.19765	1.68735	0.541693	2.59672	1.03993	4.23057	1.80785	5.71186	3.09949	11.3395	2.48923	357.906	0.79519	6.33449	12.3251		303.649	252606	10.2733	3.54756	23.8616
Zr35_L2	1400.57	481079	1.50941	24.1283	119.348	5.8436	58.3414	26.1062	4.94016	64.3705	17.7164	156.692	47.0305	221.445	45.6866	442.53	97.5647	13659.5	2.91481	170.301	345.083		82.0685	12142.7	4.14619	27.238	29.6444	25.9932	27.4152	7.44751	0.748543	8.94831	6.83952	16.7592	9.55685	19.5993	4.53045	50.4793	3.97399	402.944	3.48076	21.0952	42.7454		139.879	48046.7	0.150749	2.40976	11.9196
Zr39_L2	1047.71	482411	24.7474	4.32112	43.3797	0.149493	15.8061	9.1038	1.55405	28.3454	8.483	91.2497	37.4677	178.199	42.0461	439.619	96.3762	12924	2.76042	239.999	478.375		33.4365	6821.39	5.68114	11.7297	13.3014	11.1732	11.948	3.29688	0.367526	2.70702	1.98453	7.82296	2.94122	4.80983	3.62992	17.1579	8.04481	230.37	1.54571	6.89663	13.7466		242.817	111803	5.73545	1.00146	10.0537
Zr43_L2	690.093	484453	5.36709	54.232	187.57	13.3344	74.043	15.9014	2.3278	27.8763	6.92332	62.0186	25.3613	105.384	25.7351	237.227	50.0967	11514.1	4.88996	91.0401	154.662		30.2388	14330.6	3.65688	19.5245	21.7884	18.4693	20.6375	5.07794	0.507231	6.82794	1.37492	12.9389	5.6974	10.9601	4.05656	20.4813	6.5091	560.599	3.18202	10.6181	18.0384		96.8877	68016.2	0.753529	7.61407	26.3344
Zr21_L3	803.773	484952	4.81059	9.2124	76.0258	4.39928	31.3215	16.6444	2.71604	38.9012	10.6477	94.3082	29.0351	131.622	27.8011	262.858	55.7014	10993.3	3.45033	97.5838	193.177		56.1937	44271.2	3.02215	6.97824	9.74759	6.56332	7.15768	2.45326	0.284636	3.325	0.973142	9.27337	3.38755	10.1662	3.21465	28.4665	7.64037	993.578	1.01617	11.3981	22.5636		317.855	191776	1.90237	3.64308	30.0647
Zr23_L3	746.609	485869	2.66799	1.83973	38.8423	0.496581	11.3186	7.62158	1.86772	22.2125	6.5257	66.6114	22.7216	116.167	26.3037	254.183	56.1828	10273.1	2.07001	119.681	199.245		53.8983	35291.9	1.31517	6.54556	7.84958	6.24752	6.63957	1.91014	0.360179	2.2871	0.841923	8.01902	1.96693	12.008	3.68732	20.9388	4.80158	829.031	1.22047	10.7469	17.8914		310.176	201853	1.10841	0.764309	16.1369
Zr30_L3	860.844	484417	3.46036	2.62701	29.2116	1.45523	16.5445	10.2581	2.02139	25.1911	7.38572	77.7761	27.7973	145.698	32.9062	330.838	72.4061	11441.1	1.06243	140.438	268.638		57.6188	26212.3	2.08005	6.09194	7.16401	5.79759	6.25467	1.68854	0.482201	2.19689	1.71694	16.122	2.4694	10.568	2.90495	23.2346	5.18097	508.452	0.907539	7.14599	13.6693		384.916	216601	1.54726	1.17464	13.0616
Zr35_L3	630.414	484702	8.00157	2.50691	33.1064	-0.904035	11.3856	7.24181	1.51012	22.2192	5.55443	61.6046	20.7317	103.528	22.5552	222.478	49.7824	11647.9	2.65777	91.5762	177.795		51.3385	10594.8	4.82832	13.3197	14.5876	12.6805	13.4338	3.88183	0.410122	4.98337	1.02139	7.86397	2.38627	9.37465	1.13741	17.8394	4.82153	378.655	2.2501	9.0844	17.6374		128.811	99038.2	1.63494	0.512233	6.76456
Zr39_L3	927.681	484338	5.37615	2.3698	32.607	0.839288	13.0955	8.42289	1.66873	26.4875	7.61597	86.4716	30.4136	154.655	34.9488	336.099	74.2882	11410.2	1.04831	153.713	292.243		48.3494	11478.5	2.93162	8.86858	10.0621	8.45295	8.86985	2.41263	0.202075	3.89942	1.00225	3.3018	4.04285	9.55301	2.13601	23.613	1.71558	328.098	1.2967	7.27522	13.8318		284.873	148731	1.65091	0.72772	10.013
Zr43_L3	828.95	483773	33.4936	5.00179	43.1348	-3.71895	7.24937	2.53889	0.545322	15.1342	5.1465	67.5426	27.1774	139.712	32.0076	316.667	68.3443	12158.1	7.44897	118.127	200.425		57.1558	25034.7	7.01593	22.8949	24.7403	21.7986	22.8622	5.94671	0.691844	3.40555	1.75664	17.4066	4.33002	20.7543	4.62378	33.1813	8.98725	551.901	4.43169	12.4379	21.1032		98.5987	57542	3.98387	0.594933	5.13063
Zr21_R	1049.86	484570	2.47969	3.93894	29.6146	2.45208	14.6083	10.0357	1.70426	31.6628	9.36309	101.581	36.2667	173.149	36.4326	327.549	67.7718	11064.6	0.791566	111.865	221.321		45.6741	20636.4	0.676696	0.768022	1.30425	0.729969	1.03588	0.663963	0.13409	1.27043	0.420437	4.22724	1.51733	6.66542	1.57433	14.3079	2.50047	486.414	0.175555	4.56257	9.02689		3772.01	1.74099e+06	8.90916	14.152	106.401
Zr23_R	1107.11	484494	2.74122	3.24361	29.4598	2.24007	13.9321	10.1179	2.16647	31.6172	9.61757	104.172	38.6006	182.494	39.0928	343.365	71.8268	11030	0.917314	128.796	221.075		61.1482	16121.2	1.03716	0.835966	2.0887	0.77548	0.95772	0.591703	0.0643648	1.10875	0.436773	7.31341	2.16068	9.08336	1.20086	17.2262	3.45207	619.166	0.119261	8.00161	13.7346		3797.15	1.66172e+06	9.40184	11.1249	101.041
Zr30_R	968.533	484473	2.68707	1.88606	19.6248	1.53304	10.2301	7.35492	1.30066	24.4225	7.19572	83.9921	31.7823	160.765	35.4708	332.067	71.5901	11274.4	0.981826	136.746	252.426		35.5266	13417.6	0.537243	0.639576	0.888416	0.607546	0.863647	0.532415	0.124753	1.18507	0.408921	3.68136	0.906678	5.92921	1.3886	9.38605	2.22887	331.321	0.117407	3.36276	6.20751		4176.65	2.08922e+06	11.5876	8.13336	84.6289
Zr35_R	785.342	485139	2.45019	0.736219	13.8069	0.321325	3.22259	3.56521	0.618607	17.3721	5.79695	68.2094	26.8281	134.566	28.3349	260.799	55.0688	11012.3	0.803842	86.4242	154.563		38.8911	20112.3	0.306571	0.830692	1.15082	0.794388	0.850982	0.277129	0.114489	0.80639	0.313772	2.77689	1.59028	6.59153	1.01711	10.4675	2.75385	388.165	0.171403	3.5393	6.32976		2572.34	1.58905e+06	8.02545	2.41145	45.2237
Zr39_R	1069.4	484918	2.90743	1.63966	20.7208	0.967418	7.40017	6.25733	1.06795	25.2434	8.01596	95.3444	36.6246	182.081	39.1291	356.259	74.3473	10667	0.896741	132.569	227.984		42.177	17550.6	0.648041	0.979695	1.52911	0.932431	1.08974	0.568824	0.115645	1.6503	0.633196	4.11336	1.78874	7.6617	2.12016	16.85	2.81357	373.43	0.258141	4.0027	6.88358		2997.2	1.35907e+06	8.14862	4.59544	58.0737
Zr43_R	837.988	485150	2.41843	2.11021	15.6485	0.503571	3.74936	3.14045	0.503032	17.6433	6.0523	73.0802	28.764	143.486	30.4138	275.087	57.8078	10898.2	0.826414	98.9577	164.515		34.0259	21422.9	0.976892	0.80044	1.15109	0.752867	0.819511	0.386571	0.0336443	0.7447	0.304915	2.93704	1.10798	7.73513	1.35039	9.00929	2.75143	447.81	0.142263	4.48934	7.46344		2892.45	1.67457e+06	8.34761	7.28374	54.0133
210 °C Experiment
Zr02_L1	1977.32	481002	9.36191	32.9446	395.345	25.1878	144.314	69.1868	13.683	131.999	28.7767	231.877	66.1579	280.062	55.4459	495.074	106.329	12251.3	2.60672	327.288	664.115		73.5832	14344.5	1.00503	1.45349	9.02574	1.25357	4.15586	2.09125	0.527902	3.74015	0.979423	11.0052	2.71353	7.5957	1.59832	12.0048	2.67276	847.99	0.19312	7.66736	15.5582		5057.18	1.23021e+06	23.9439	84.2587	1011.13
Zr08_L1	1748.23	480785	19.3601	57.2581	515.863	32.1714	167.275	81.325	14.8584	146.313	31.3765	243.149	63.2658	234.497	43.4404	372.766	74.7108	12906.9	2.49606	106.07	255.705		91.0674	30044.1	1.56182	3.4598	25.7878	2.50546	8.86082	4.95899	0.910846	7.50293	1.49889	12.86	4.56523	12.7706	2.35257	18.9888	4.39554	694.542	0.54785	7.29321	17.5819		2297.77	631913	25.4456	75.2564	678.018
Zr13_L1	1245.63	482952	6.62364	40.3032	430.617	24.0377	118.913	54.1719	8.52301	90.8863	19.8794	159.813	44.0498	175.575	33.9932	303.767	62.444	11767.6	1.35938	105.435	191.372		54.6521	26526.6	0.51099	2.24655	22.5224	1.42868	5.42781	3.0881	0.607198	4.37177	1.6317	11.6902	2.14412	7.12242	1.55608	18.3016	2.83124	543.326	0.223959	4.94045	8.9673		4375.74	1.69655e+06	23.2681	141.58	1512.71
Zr22_L1	1480.68	484429	8.61111	43.8722	176.291	20.0584	100.681	48.2921	6.94391	94.3379	22.0189	192.642	54.6672	216.227	40.3844	330.025	63.867	10214.2	1.27399	101.424	130.624		78.4216	31526.5	1.35217	2.67883	8.91848	1.81106	5.3276	3.45219	0.465293	5.86859	1.67306	11.71	3.5133	12.6632	2.26544	16.0916	2.9265	499.271	0.256765	5.25138	6.76329		2530.4	827866	14.716	74.9753	301.272
Zr27_L1	1610.27	482704	7.84387	37.7143	585.799	29.218	145.685	81.6495	13.5043	137.081	31.296	236.509	58.1481	215.538	39.3495	328.535	64.3922	11237.4	1.50491	80.5761	153.105		80.3097	21456.9	1.7195	1.94054	24.3697	1.8197	7.16693	3.42779	0.637491	6.60379	1.02255	11.9597	2.50736	10.4182	1.25501	10.9873	3.60214	457.057	0.268948	4.90044	9.31149		3246.34	973139	15.8134	76.0327	1180.98
Zr41_L1	928.042	485344	12.2373	21.8996	149.51	12.047	66.6038	32.2838	5.32186	61.934	14.7806	121.103	34.0473	134.767	25.2094	223.856	45.8934	10293.5	1.20876	117.862	224.098		41.2551	19892.4	3.90629	2.95739	6.68987	2.78992	4.90469	1.73493	0.811651	5.31162	1.51641	9.98864	1.62481	7.12353	1.56921	8.36141	2.63918	410.673	0.395329	6.02845	11.4622		881.666	461090	11.6258	20.8053	142.039
Zr02_L2	838.654	485444	3.17148	6.35783	38.5079	3.14053	20.5234	10.1138	2.50877	26.4397	7.0629	72.7498	26.3303	135.285	30.1574	304.122	66.6142	10476.5	1.12846	132.861	229.283		38.1427	16904.6	1.22227	2.30494	2.94002	2.17223	2.51449	0.917432	0.130063	1.62942	0.752601	4.54413	1.24672	11.1655	1.77716	11.1116	4.0475	391.149	0.330071	5.89256	10.169		1004.54	581463	3.79879	7.61539	46.1246
Zr08_L2	1024.68	483617	60.4961	-7.99159	78.9742	-20.5447	17.5385	15.7994	4.29178	41.6884	11.5936	102.155	31.358	159.905	34.7035	332.956	73.8992	11911.2	7.63315	148.149	267.223		134.856	32021.9	23.1622	95.8683	103.686	91.376	96.1476	25.3439	1.42458	18.6543	4.70029	18.8065	6.09161	23.95	14.6972	77.4165	14.5588	736.169	12.8403	16.6585	30.0478		29.0473	13709.5	1.71493	-0.226543	2.23874
Zr13_L2	1671.38	484050	3.06416	13.5819	82.597	8.39454	49.336	24.5674	4.60114	60.0049	15.0256	154.921	55.4359	262.64	55.8174	519.82	112.236	10287.4	1.07113	214.384	367.664		24.7163	8607.25	1.08261	1.82766	2.67212	1.71657	1.92314	0.770255	0.318659	1.89702	0.872541	5.32247	1.52405	8.63809	1.84659	18.6253	2.36321	160.113	0.287684	5.03519	8.63526		2554.51	739816	4.68322	20.7583	126.24
Zr22_L2	1181.47	485189	3.43246	8.47532	39.162	3.48206	20.3028	12.4621	1.85995	37.8781	10.9132	115.624	41.587	195.584	39.2665	346.873	71.5016	10211.5	1.00486	114.392	175.708		46.1094	16372.2	0.794432	1.71811	2.46234	1.62957	1.85753	0.864434	0.232788	1.75295	0.642518	4.85244	2.01719	7.54604	1.26688	15.4824	2.88655	343.241	0.27297	6.15449	9.45337		1888.32	775472	5.48606	13.546	62.5921
Zr27_L2	1064.06	484421	3.16326	14.6879	84.2496	7.92531	43.0632	22.8471	3.9426	47.9752	12.3288	109.76	36.0399	166.758	35.6827	324.727	70.4745	11058.5	1.13047	117.808	225.383		49.6571	21231.4	1.05974	2.7162	4.5509	2.53389	3.26942	1.73962	0.33625	2.06746	1.32166	5.64637	2.53498	10.8673	1.6716	18.8007	4.56028	398.431	0.511186	4.28455	8.19693		1096.95	499391	3.26101	15.1418	86.8532
Zr41_L2	835.276	485445	7.43767	3.82236	30.2085	1.30854	14.4297	7.75412	1.52918	24.0387	7.0751	75.7433	28.435	135.874	28.7833	283.983	60.6543	10557.2	1.93468	95.5214	172.71		25.1851	9006.58	1.99359	5.91109	6.38307	5.62775	6.36219	1.68581	0.349667	3.60565	0.769061	9.45923	1.92608	10.1377	3.02836	13.5705	4.30506	295.431	0.986999	4.41576	7.98404		384.591	223517	3.42457	1.75995	13.9091
Zr02_L3	1370.38	484851	3.97711	1.75075	30.1838	-0.720935	7.99048	6.91068	1.80105	32.6751	11.3007	119.702	46.3249	234.323	49.3865	455.102	93.0753	10170.6	7.08474	153.517	244.133		60.154	14030.7	1.72874	8.70733	9.54253	8.30452	8.70175	2.40122	0.369813	4.02645	1.04441	5.53788	1.47982	10.6065	3.35751	32.2921	6.39678	514.417	1.50881	4.81669	7.65982		427.707	151326	1.24129	0.546424	9.42065
Zr08_L3	886.589	484429	2.73601	-0.100468	14.7336	-1.54483	7.47493	5.99797	1.07928	22.2007	7.3249	78.1886	30.6839	156.286	32.5663	299.214	65.1787	11497.4	3.40992	107.927	183.057		40.2702	15443.2	3.35062	12.1555	13.1796	11.5995	12.5918	3.66028	0.503327	2.54308	1.36193	25.0003	4.11031	13.5417	2.90581	18.8237	5.54728	433.767	2.14914	6.29927	10.6843		198.268	108333	0.611855	-0.0224676	3.29489
Zr13_L3	455.282	483911	75.6699	-12.8253	-2.2956	-12.4682	-11.3718	-1.21404	0.196199	7.72492	3.29063	45.1011	16.6145	78.7227	19.5277	189.897	37.1678	12784.5	4.42205	56.8214	95.655		78.4241	35812.1	37.3456	47.9861	51.9087	45.7998	48.0212	12.0415	0.553953	7.93831	3.03372	12.0856	8.94543	23.4936	2.47015	40.2415	9.20219	889.072	5.89961	9.96592	16.7769		25.8178	27441.3	4.29104	-0.727289	-0.130178
Zr22_L3	804.15	485224	3.91559	1.14101	20.2523	-0.0337655	3.95434	3.63895	0.566093	16.648	5.5925	69.2551	26.4867	134.221	30.5146	289.136	61.1589	10859.5	0.8916	91.1126	146.52		45.3517	31397.5	2.00253	3.20445	3.60634	3.04776	3.22732	1.09518	0.0833376	1.88297	0.992151	7.06831	1.38427	10.7503	1.50882	20.6535	3.83642	589.648	0.518598	5.27533	8.48338		684.102	412787	3.33105	0.97067	17.2289
Zr27_L3	635.299	485599	2.5256	1.86246	29.2906	0.597111	9.62471	6.65946	1.0973	17.0263	5.0025	57.5293	20.8754	106.427	24.0046	233.527	52.083	10752.6	4.81845	86.3823	161.344		23.9117	16026.6	2.06027	5.19475	5.71126	4.94847	5.19045	1.71428	0.220323	0.880911	0.639212	5.41862	2.8208	6.29772	2.99604	13.024	4.93037	354.819	1.1643	5.06443	9.45929		332.88	254441	1.32335	0.975884	15.3475
Zr41_L3	879.515	485826	3.35516	-0.00879938	16.8578	-0.776878	5.02293	4.94169	0.938734	20.9944	7.0261	81.8138	30.883	149.544	30.9876	295.578	61.2804	10062.3	84.4225	85.648	157.043		41.3938	15360.7	2.35307	7.39319	8.09386	7.05252	7.39687	2.20834	0.249502	2.34905	1.63375	11.9014	3.93174	6.5478	1.89664	8.34282	4.81366	290.321	4.39563	5.3916	9.88596		323.948	178942	1.23579	-0.00324104	6.20916
Zr02_R	1166.81	484650	9.74549	-2.7344	12.5301	-3.05554	0.320665	3.23013	0.875638	23.7957	8.54564	100.207	40.1102	208.139	43.1905	380.455	83.495	10800.8	0.766759	118.578	200.347		51.1495	16020.9	3.4079	13.177	14.3505	12.5782	13.1616	3.42902	0.633508	3.5257	2.35742	6.97424	6.37326	21.7131	2.13514	26.7147	3.88405	400.787	1.61495	8.4431	14.2653		241.388	100263	2.01612	-0.565686	2.59219
Zr08_R	724.712	485833	2.76424	-0.544407	10.6455	-1.04122	2.21238	2.81681	0.603506	14.81	5.5603	66.6962	25.9762	127.634	28.0055	254.753	53.1381	10413.1	0.700036	80.7127	147.524		29.7589	14331.4	0.760559	5.27263	5.76346	5.02217	5.25379	1.49442	0.082724	3.19905	0.556618	9.16418	1.53403	7.86144	2.30152	10.5553	4.14951	261.818	0.699316	5.6425	10.3132		373.652	250489	1.42521	-0.280689	5.48866
Zr13_R	1438.86	483587	7.28429	-1.725	19.6944	-2.38192	7.82691	8.35081	1.62251	35.0899	10.7225	121.657	49.0492	235.571	51.9351	470.356	96.1907	11344.5	0.872633	163.05	268.33		60.512	15550.6	4.44137	16.0257	17.37	15.2813	16.1723	4.56523	0.311595	5.07563	3.01383	15.5871	7.56337	11.0152	5.58665	31.6758	10.0045	297.005	2.23411	9.01579	14.8372		244.234	82085	1.23645	-0.292805	3.34296
Zr22_R	1078.55	485452	2.79367	1.29503	15.324	0.407239	4.48238	4.60058	0.722387	24.0106	8.156	98.1975	38.0823	185.606	38.0779	330.309	68.1724	10190.3	1.11253	104.063	172.131		34.848	3159.54	0.665347	1.03088	1.22452	0.982527	1.08452	0.369659	0.0786171	0.830914	0.329122	7.58507	0.763143	5.52919	0.691398	7.90491	1.52511	164.945	0.274676	2.35599	3.89706		2844.08	1.28011e+06	7.36678	3.41495	40.4086
Zr27_R	1357.54	483923	2.3789	3.40704	26.6795	1.80517	13.9611	10.5701	1.67162	37.3666	11.2743	131.184	46.7594	231.669	46.9452	412.359	84.6364	11162.9	0.635335	139.564	261.582		52.3572	17517.7	0.803598	3.33121	3.71399	3.17386	3.60192	1.24325	0.314259	2.76024	1.18274	9.00025	2.92502	17.2312	1.8135	17.7843	3.63495	333.414	0.522296	5.82676	10.921		1110.76	395953	1.94645	2.78769	21.8295
Zr41_R	1297.48	485221	2.35664	0.304448	13.0143	-0.65395	5.50742	6.00277	1.06408	31.6156	10.4057	119.255	47.4828	225.063	46.0774	393.077	79.6502	10041.2	0.614097	105.849	195.855		34.136	9928.72	1.19483	6.41929	7.00253	6.11926	6.4079	1.88519	0.331166	2.86691	2.41323	12.7181	3.27216	12.6094	2.49089	24.1031	5.49877	271.461	0.829319	5.71789	10.5799		549.208	205388	0.997538	0.128869	5.5088
a[U] calculated from the [Th] determined by ICPMS and the Th/U ratio determined by TIMS.
[truncated: 37 more columns]

## Sheet: KR18-04
Table S2. KR18-04 ICPMS major and trace element results.
	Concentration in mineral (ppm - parts per million)																																												Concentration in 1 mL solution (ppt - parts per trillion)
Fraction	Y	Zr	Nb	La	Ce	Pr	Nd	Sm	Eu	Gd	Tb	Dy	Ho	Er	Tm	Yb	Lu	Hf	Ta	Th	Ua		Y (2σ)	Zr (2σ)	Nb (2σ)	La (2σ)	Ce (2σ)	Pr (2σ)	Nd (2σ)	Sm (2σ)	Eu (2σ)	Gd (2σ)	Tb (2σ)	Dy (2σ)	Ho (2σ)	Er (2σ)	Tm (2σ)	Yb (2σ)	Lu (2σ)	Hf (2σ)	Ta (2σ)	Th (2σ)	Ua (2σ)		Y	Zr	Nb	La	Ce
180 °C Experiment
Zr07_L1	6120.15	473069	1437.87	59.3854	300.924	38.9377	205.678	150.182	3.88954	377.504	98.9294	874.676	254.459	983.93	176.142	1432.19	252.309	10601.2	24.8964	1183.77	1651.1		247.288	7215.59	103.289	4.2803	13.0763	4.36619	6.89005	16.8715	1.94836	39.8218	5.92845	84.6074	25.4881	98.6916	28.1735	84.1096	37.5604	272.002	10.2731	110.939	154.736		260.141	20108.2	61.118	2.52422	12.791
Zr15_L1	15091.7	449192	2378.97	57.5394	1027.99	77.8166	458.837	373.251	10.7886	1009.29	259.494	2279.06	616.271	2469.4	452.703	3602.06	606.503	14396.9	66.9365	3218.21	3530.27		696.95	6609.31	238.438	8.15524	49.6373	3.01037	57.6114	26.4829	5.09557	151.695	49.6638	166.252	52.6476	193.855	61.7951	299.941	39.1572	987.266	21.5307	242.891	266.443		222.521	6623.15	35.0769	0.848394	15.1572
Zr23_L1	3997.54	477031	789.403	33.799	303.183	43.3723	196.802	92.4774	2.21357	248.807	68.7441	572.448	157.324	651.179	121.369	994.866	174.866	11357.4	79.9079	729.029	642.664		155.391	12763.6	135.043	4.95552	17.7548	4.02602	14.2341	17.2071	0.997043	30.4843	13.5766	114.37	30.8303	116.59	12.8694	108.333	24.8091	827.569	29.5444	60.7911	53.5893		115.37	13767.2	22.7823	0.975444	8.74992
Zr31_L1	3991.73	480437	227.335	5.63013	162.514	5.88273	44.3555	61.8907	1.87254	206.122	54.7333	532.056	149.104	599.068	109.141	882.935	158.82	9335.61	23.2311	657.068	623.944		147.942	12871.6	15.2562	1.17421	10.9329	1.13785	3.17369	6.73756	1.32731	21.5666	8.2729	77.3989	12.1723	59.4332	8.38997	39.7505	12.0929	238.948	4.1046	16.9429	16.0888		465.71	56051.9	26.5229	0.656859	18.9603
Zr33_L1	9317.77	467321	587.033	55.0447	369.702	31.1986	206.114	197.409	5.75273	537.67	144.763	1269.8	337.728	1420.08	260.315	2197.45	371.494	10228.4	110.397	2676.45	1794.93		744.92	16793.2	98.5745	11.5648	32.6282	4.95173	28.238	40.9535	2.41811	56.2014	34.0014	94.3783	27.7664	332.37	44.743	262.423	43.5024	444.653	32.2961	127.893	85.7703		155.615	7804.67	9.80395	0.919294	6.17433
Zr07_L2	2078.8	484376	28.3985	4.93188	22.9541	3.83998	26.9819	13.4326	6.46173	64.6347	19.4854	219.686	84.3464	328.676	66.9155	520.8	100.901	9564.18	4.58052	109.917	60.9823		87.5761	25010.3	15.6429	3.56421	6.37258	1.80249	4.52651	4.21151	2.94596	19.2871	8.10104	23.0283	10.6211	46.9442	13.8314	50.7143	12.8682	595.718	4.4967	21.6021	11.985		79.1519	18443	1.0813	0.187785	0.873995
Zr15_L2	3180.77	478377	59.1032	-0.522068	32.3291	283.274	1039.79	51.1393	0.547604	220.741	44.1118	367.233	124.261	429.242	101.209	781.939	122.41	12035.5	93.1734	302.813	444.278		547.598	8550.29	75.9236	6.22754	20.3383	24.9782	96.0224	17.2455	2.57008	64.4468	38.8136	85.6303	23.5167	106.898	24.3766	178.095	34.4505	805.573	13.6671	41.654	61.1137		31.1044	4678	0.577963	-0.00510524	0.316143
Zr19_L2	3854.47	481652	31.821	-0.660693	34.5521	9.45234	46.0376	14.9032	0.322754	92.9123	35.7954	406.857	148.595	631.582	114.006	883.36	156.178	9264.2	55.7079	214.127	224.016		196.013	21316.3	17.6447	0.869322	4.82175	1.85664	5.99213	4.69535	0.992384	14.498	8.72955	35.6028	12.1646	53.4187	7.82416	66.6476	7.56454	382.228	15.6973	16.4662	17.2267		183.434	22921.8	1.51436	-0.0314423	1.64433
Zr23_L2	1932.39	478060	577.73	3.28749	57.5275	9.8545	48.2422	14.7478	0.170671	64.9357	17.7621	246.72	72.7899	342.747	59.7053	522.462	89.4962	8475.83	6944.51	104.858	90.5988		200.073	23246.5	120.528	2.98406	8.67814	3.68158	14.7788	8.52147	0.923595	20.4395	14.0874	99.3483	15.3249	38.2106	17.416	117.957	22.4439	361.337	496.119	25.038	21.6333		43.0765	10656.9	12.8787	0.0732842	1.2824
Zr31_L2	3169.26	482715	213.622	1.69261	53.65	0.0332432	4.99262	13.6973	0.329697	83.1351	29.1979	340.915	118.117	515.338	95.6494	761.145	134.303	9139.89	8.95492	246.577	230.042		109.116	17085.3	14.8824	0.624222	6.86028	0.284484	3.44962	3.82906	0.233206	12.9543	3.9466	29.2509	13.0231	51.3068	9.34765	99.869	8.84881	395.467	2.75503	19.9466	18.609		440.052	67025	29.6614	0.235018	7.4493
Zr07_L3	1619.08	485024	372.806	2.06095	23.9773	0.824179	7.36845	7.03014	0.165026	42.8032	16.768	180.614	64.9559	263.487	51.0633	405.17	75.2927	9385.95	35.1849	67.7106	78.3586		52.4723	9904.61	62.14	1.75647	5.79886	0.74695	4.80349	3.48478	0.826902	11.0468	3.10345	47.4141	9.00921	45.2924	9.39908	60.595	11.6648	351.194	15.3939	18.8585	21.8242		75.3418	22570	17.3481	0.0959038	1.11576
Zr15_L3	2116.19	484212	23.5456	2.23428	37.2202	23.6811	86.9307	21.2002	2.52038	91.0915	25.6464	303.013	80.1624	366.446	64.9583	489.337	101.342	9423.21	22.6492	153.029	154.317		219.263	21005.5	46.1304	6.48323	21.6035	5.78802	30.2465	8.74262	4.24584	26.7777	13.2442	153.181	24.5693	102.521	15.7469	118.999	21.7884	668.03	28.1802	49.7444	50.1632		21.9147	5014.35	0.243832	0.0231376	0.385441
Zr19_L3	3588.24	482098	121.167	-1.47261	33.3085	0.817883	5.65883	12.4832	0.538092	81.5759	34.8616	374.72	136.138	546.17	103.649	812.631	137.949	9336.15	10.9838	212.204	219.909		157.065	17053.9	16.6373	0.848717	6.81798	0.87458	6.97981	3.43599	1.09619	29.2789	2.95629	68.6584	12.7468	48.6828	24.3276	35.7894	11.3308	628.212	4.96562	13.1873	13.6661		198.853	26716.9	6.71482	-0.081609	1.84589
Zr23_L3	1802.7	485022	17.6971	-1.53564	62.1281	14.0027	53.5081	14.1034	0.0480104	58.0375	18.7373	199.712	69.6447	304.621	55.0165	410.734	82.7356	9297.9	87.4959	76.3837	96.7298		140.459	20984.3	30.8653	2.13468	14.3492	2.67128	9.07565	7.87769	0.718059	9.50888	6.02369	51.9974	19.4981	44.8388	30.596	122.965	13.411	672.797	9.87716	8.91545	11.2902		44.2631	11909.1	0.434531	-0.0377058	1.52548
Zr31_L3	3636.66	482326	58.8743	0.191405	50.3189	1.00074	7.11128	14.8285	0.445987	92.3454	33.0095	385.649	133.935	580.791	107.236	810.019	149.7	8994.53	10.0824	253.158	242.531		182.623	13947.2	17.5122	0.586655	1.38397	0.420353	4.5157	3.73752	0.385509	6.70413	3.42149	26.6257	10.068	38.2501	11.6783	53.8811	8.15841	392.82	3.10345	18.5057	17.7289		458.723	60839.8	7.42631	0.0241435	6.34714
Zr33_L3	2014.6	484034	53.5288	2.76449	12.5642	188.122	583.355	15.0705	0.34573	104.67	27.7458	233.759	71.8124	347.372	59.5848	476.744	84.5574	9230.67	23.003	81.6533	18.2611		222.774	26882.3	46.6987	3.72113	7.54857	14.5583	51.868	11.5076	0.973903	25.1428	17.3731	85.9671	25.1343	115.155	13.645	123.398	19.5381	631.962	12.6991	26.4917	5.92466		32.2396	7745.96	0.856618	0.0442399	0.201065
Zr07_R	1923.58	485662	12.2334	-0.0567542	15.0876	0.389944	4.97751	10.2765	0.148832	58.8552	18.5127	216.561	73.7856	316.246	57.795	453.685	86.0979	8663.97	3.11214	68.4449	82.6777		68.7488	21905.5	3.93967	0.0533221	0.876882	0.126184	0.728176	0.772797	0.0780829	2.60405	1.76768	14.4328	2.58279	13.5921	2.26427	17.6876	4.8182	299.069	0.371056	2.76676	3.34209		2238.91	565277	14.2388	-0.0660579	17.5609
Zr15_R	1710.99	486247	11.0122	0.0442754	14.3839	0.377252	5.17783	10.42	0.174052	54.8596	16.8176	191.337	65.5946	277.954	51.9459	403.796	77.2719	8444.77	3.06303	58.5933	69.6446		76.074	21534	1.95691	0.0589524	1.11377	0.0577335	0.842975	0.939097	0.0561698	2.34506	1.21657	6.6842	2.18218	16.5562	3.70282	19.6814	4.00098	391.286	0.685688	3.63166	4.31663		2347.06	667011	15.106	0.0607348	19.7312
Zr19_R	3965.3	481863	48.6812	3.51954	47.4207	1.11941	7.93571	14.9162	0.291296	100.174	36.1466	431.343	152.6	656.077	116.355	878.47	151.063	8908.69	9.18077	253.966	256.905		133.214	17307.6	3.80625	0.177132	1.65907	0.0509977	0.661094	0.821722	0.0624649	4.10859	1.62032	18.9451	5.17131	21.4959	4.5631	27.8393	4.7743	265.692	0.652336	10.4602	10.5812		11360.4	1.38051e+06	139.469	10.0833	135.857
Zr23_R	1734.34	486223	10.8914	5.79592	29.6121	2.5468	15.3666	12.0861	0.17682	56.1372	16.8961	192.617	66.186	281.709	51.6011	407.61	78.1465	8399.69	2.68043	58.6967	68.0685		40.9542	11082.9	1.94939	0.206659	1.22692	0.166936	0.536819	0.949841	0.0452918	1.74791	0.977009	5.25055	2.29015	7.97969	2.76488	11.8541	3.26996	317.546	0.540983	2.29798	2.66488		3592.75	1.00723e+06	22.562	12.0064	61.3425
Zr31_R	5749.76	479234	49.0938	0.371776	43.8139	0.883174	9.79376	22.4345	0.463143	156.041	55.1382	651.676	228.969	958.308	171.51	1273.23	217.819	8500.27	8.17092	314.725	316.524		218.076	18548.8	2.33656	0.052729	1.55321	0.0467481	0.928205	1.4712	0.0724286	4.85502	1.67851	35.2561	7.59503	32.1563	7.82378	42.7306	6.73003	250.632	0.810466	11.0941	11.1575		10270.6	856040	87.6947	0.664093	78.2634
Zr33_R	1780.21	486125	9.75271	-0.0196455	14.3141	0.324131	5.2152	10.5663	0.177198	58.0734	17.9351	201.015	68.756	292.049	53.0684	419.097	78.0108	8454.5	2.65482	55.7043	63.94		53.9823	18536.4	2.0151	0.0453169	0.769059	0.0948322	0.431647	0.655368	0.0635176	2.51677	1.53939	10.6138	3.64145	13.4251	3.09495	25.1046	4.28596	331.378	0.758684	3.02664	3.47412		1669.47	455884	9.14603	-0.0184234	13.4237
210 °C Experiment
Zr01_L1	3075.96	478838	3624.69	50.7946	156.21	25.428	150.499	112.942	2.34638	229.961	56.2429	463.588	120.857	453.499	82.0452	653.34	113.295	9139.98	44.8614	251.043	299.779		147.863	22114.2	159.24	2.93273	7.86487	1.36144	8.28695	6.03515	0.69425	15.5698	5.78782	23.5179	14.0562	24.0208	7.07302	29.7687	9.85733	341.487	2.9153	18.9895	22.676		635.781	98972.7	749.2	10.4989	32.2876
Zr02_L1	5257.05	477527	572.846	47.9267	320.265	29.3288	184.771	152.001	5.31097	360.143	86.5595	726.623	202.77	777.351	140.519	1081.42	187.605	9459.09	14.8369	512.185	647.096		245.927	9057.21	36.0882	1.89216	14.7317	1.89	13.5232	10.9517	1.20255	23.6935	7.14092	42.7024	15.627	41.5668	17.6194	95.7567	16.8214	627.825	6.21823	15.3898	19.4435		439.7	39940.4	47.9129	4.00859	26.787
Zr03_L1	3038.18	482158	319.951	33.2501	109.698	15.7667	98.2712	81.2141	1.71381	204.432	50.2113	433.748	119.783	462.333	85.1623	685.7	120.844	9103.51	15.9395	508.182	343.982		103.546	13960.9	16.5692	1.84842	3.89614	0.79123	8.61217	3.62434	0.329834	10.5924	4.01053	33.046	6.45208	19.4798	7.57546	25.336	4.64045	302.755	2.55912	15.9406	10.79		881.799	139941	92.8625	9.65051	31.8386
Zr04_L1	4787.13	478383	496.034	34.5436	182.186	22.4397	153.388	136.268	3.0484	319.694	73.2502	637.032	178.748	704.575	128.926	1037.15	183.326	9344.02	31.7536	809.673	827.397		262.453	27853.8	33.7875	2.04824	11.4391	2.39575	15.6291	10.2898	0.823779	22.122	6.18311	62.2673	13.0039	41.9238	7.04683	55.0746	14.094	467.022	3.87371	41.3965	42.3027		845.624	84504.1	87.6221	6.10197	32.1822
Zr05_L1	5469.79	476557	515.965	58.9216	190.249	29.5843	184.436	166.642	3.23262	409.361	102.814	860.9	221.508	815.597	147.258	1078.63	189.571	9809.94	40.2683	794.534	825.036		278.364	16243.7	38.1643	3.93095	10.1789	1.5847	20.5048	17.4088	1.20241	25.2268	17.5476	93.4899	15.8288	76.7067	26.9486	111.648	10.8769	476.191	5.86028	49.5196	51.4207		335.837	29259.9	31.6795	3.6177	11.681
Zr06_L1	4706.33	478831	430.003	60.1475	258.455	29.2019	166.843	126.062	2.69223	310.32	77.789	685.812	189.29	719.127	125.193	999.038	173.311	9315.38	20.6747	419.042	399.195		247.507	29985.2	23.4484	3.39656	18.0506	1.61545	13.6589	11.2887	1.12161	20.0319	8.68191	46.1841	13.137	51.0844	9.23323	63.4113	10.2822	556.737	4.02121	27.3879	26.0908		1075.98	109472	98.3087	13.7511	59.0888
Zr08_L1	4617.65	477270	1515.13	55.0197	240.243	26.5494	163.985	150.126	3.15003	317.801	77.7222	699.643	195.679	727.749	135.297	1062.49	185.755	9365.87	47.374	789.214	704.988		247.521	11293.6	165.455	6.68033	17.248	1.39649	15.3956	13.7813	1.3568	34.5821	10.1322	104.699	9.72328	51.025	20.1316	116.213	9.16492	556.687	7.09233	51.0182	45.5735		197.163	20378.3	64.6924	2.34921	10.2578
Zr09_L1	5823.86	475492	826.687	41.1643	269.19	30.7232	198.019	172.558	3.59138	379.16	97.8468	856.17	246.368	955.956	164.49	1252.63	213.515	9525.1	43.6188	1053.47	1214.62		164.268	14301.7	37.9563	1.53413	14.7588	1.39328	8.95451	5.13384	1.15362	17.9989	9.80627	56.735	10.5209	29.8434	9.38718	90.7932	11.091	379.855	2.79177	38.5884	44.4916		1216.52	99323.2	172.683	8.59861	56.2297
Zr10_L1	5259.6	479101	140.868	32.666	154.632	15.2861	87.0656	68.1588	0.90758	199.313	59.7323	642.03	206.439	855.427	157.293	1230.17	213.091	8945.87	6.35699	270.19	299.938		167.644	17556.2	25.0127	1.73663	10.0602	1.81383	13.6638	8.52522	0.882334	29.5526	5.77252	23.025	18.6186	63.0294	9.58107	66.4415	13.1374	440.504	3.34611	18.7376	20.8007		419.728	38233.4	11.2416	2.60683	12.34
Zr11_L1	7478.27	464347	4828.67	221.267	1023.97	177.214	1159.11	823.799	14.2767	1165.22	217.134	1450.1	342.18	1155.45	189.777	1536.39	264.697	9500.31	102.511	1648.93	1667.21		281.609	12179.9	228.117	5.59226	34.5612	7.26612	34.1295	25.9279	3.37607	44.986	12.0319	84.6638	23.2525	52.4891	13.7515	47.624	10.8025	202.379	12.8183	81.7328	82.6391		569.922	35388.1	367.996	16.8628	78.0374
Zr12_L1	3964.86	480506	243.777	55.1667	236.909	23.674	129.856	84.649	2.45746	223.341	55.0988	543.063	159.962	637.478	111.442	892.383	160.69	9041.64	63.4966	510.384	492.378		96.2643	8362.47	26.6133	3.28007	15.9103	1.31983	11.7432	9.82574	0.491359	23.0873	9.86351	53.9655	12.9165	55.4828	11.3021	28.1913	7.4413	183.052	12.0643	34.6853	33.4616		490.788	59479.1	30.1759	6.82878	29.3256
Zr13_L1	5257.95	476875	456.826	23.791	168.526	18.5524	130.511	128.033	3.1444	330.481	82.5964	718.531	205.302	828.233	147.577	1146.23	188.999	10029.5	33.8188	872.075	434.625		143.343	5789.37	57.4857	3.24369	10.7389	1.67989	11.8102	11.3016	1.96012	26.0959	5.70204	104.486	11.2518	85.9718	13.558	126.708	13.6356	384.13	7.35272	33.6158	16.7535		321.454	29154.6	27.9288	1.4545	10.3031
Zr01_L2	1379.14	486256	10.7321	1.38185	15.4622	0.515806	6.06848	10.854	0.173838	45.3691	14.7915	153.954	52.2937	222.406	42.4453	347.213	67.4534	8853.75	109.281	56.2911	68.0751		86.1929	36694.8	5.32813	0.515168	1.39379	0.232799	1.48653	1.39754	0.185493	2.86011	3.1585	14.9131	4.07515	25.2123	4.70351	25.011	7.74913	576.881	11.7172	6.45211	7.8028		348.703	122945	2.7135	0.349386	3.90947
Zr02_L2	1551.93	486098	10.1617	1.51426	15.3018	-0.0500893	4.72925	11.7452	0.109635	52.2264	16.9313	182.715	60.4543	251.886	46.3156	353.589	68.0698	8862.29	5.57292	52.8724	64.6104		92.6271	11773.8	11.6766	0.556015	1.26985	0.362061	3.35428	1.36513	0.349873	4.13549	4.20014	11.4154	3.61225	16.7293	4.476	13.0978	9.04901	271.809	2.94497	5.97971	7.30724		165.492	51835.5	1.08361	0.161475	1.63172
Zr03_L2	1386.89	486382	12.6932	0.723376	14.8196	0.290466	5.40388	9.7063	0.240401	46.1294	13.7846	158.309	54.2345	226.99	43.4069	345.156	66.4151	8793.77	11.1073	74.3098	83.7959		67.4531	14179	3.43704	0.241511	1.3941	0.218852	1.37127	1.4769	0.102643	5.77029	2.01641	10.664	5.11124	18.2685	6.22831	20.1148	2.76558	288.184	1.58705	3.67275	4.1416		422.905	148312	3.87053	0.220579	4.51895
Zr04_L2	1432.56	486398	13.9079	1.03897	16.2689	0.756193	7.7315	12.4152	0.293843	47.6515	14.2857	159.775	53.0442	229.739	44.5788	356.003	71.3133	8705.74	4.45805	76.9313	90.8425		41.4758	9290.89	6.86057	0.418057	1.48682	0.226403	1.52474	1.66651	0.258304	1.63721	1.7416	16.7546	5.68048	19.0199	4.08442	22.5193	5.45788	327.476	1.82349	2.80018	3.30653		321.325	109100	3.11956	0.233044	3.64913
Zr05_L2	1953.37	485207	19.0397	8.22887	45.2209	2.6815	15.9458	13.8349	0.12891	59.2241	17.8576	204.724	74.8089	313.749	57.7855	450.225	84.6554	9018.95	3.87402	94.5922	113.441		66.2108	10847.8	16.3833	1.55278	4.00295	0.444819	3.13598	3.83652	0.35647	7.60095	2.59036	20.2591	8.93695	40.0576	6.54418	35.83	4.89837	191.475	1.87025	14.0192	16.8128		176.053	43730.9	1.71602	0.741653	4.07568
Zr06_L2	1772.17	485439	19.2102	4.1889	36.4523	1.6957	10.9251	13.155	0.252471	54.0778	16.6058	195.668	65.6098	287.919	53.8146	431.026	79.4737	9081.44	4.68425	78.9438	94.7167		70.0115	10639.7	5.7556	0.774602	3.42032	0.351362	1.50832	1.73417	0.116585	7.51303	4.07674	30.1033	3.67902	29.348	8.13968	35.4943	5.11559	306.798	1.43676	7.27007	8.72262		440.098	120553	4.77065	1.04027	9.05251
Zr08_L2	1313.63	486556	14.1368	2.01203	16.9191	0.0730604	1.51222	7.34963	0.136817	41.4247	12.6138	152.218	50.3895	216.922	42.4217	354.06	64.3416	8738.75	4.64513	56.6518	66.3582		51.4648	14873.8	5.71442	0.941125	1.64122	0.700307	3.667	3.5542	0.448092	4.18893	6.85419	21.1458	6.50215	24.058	5.05585	33.579	5.69114	484.09	2.88379	5.4225	6.35156		106.79	39553.8	1.14923	0.163565	1.37541
Zr09_L2	3355.8	482461	69.5044	0.239338	49.2986	0.28531	2.19059	13.2387	0.251217	89.7893	30.7402	366.999	131.873	550.426	99.9179	768.274	137.043	9294.52	15.8074	208.618	253.552		128.489	17948.6	14.4649	0.404039	5.06991	0.355098	1.96906	4.5332	0.185105	12.8631	2.27806	25.726	9.39232	42.9485	7.82981	23.9613	13.9684	431.132	2.59656	12.5561	15.2605		495.868	71290.6	10.2703	0.0353657	7.28458
Zr10_L2	3964.5	481968	24.0453	-0.363841	28.841	-1.02304	1.22227	14.9459	0.0969302	106.26	34.544	427.667	152.481	648.519	114.649	856.73	160.791	8960.36	44.812	138.497	159.526		182.128	9822.8	14.921	0.431008	2.32495	0.358093	2.06083	2.57023	0.203823	6.15838	6.83291	48.6003	11.674	51.7989	8.13506	53.2801	7.92158	225.099	7.97145	12.7108	14.6408		386.981	47045.7	2.3471	-0.0355151	2.81521
Zr11_L2	3898.48	481799	20.468	42.7063	161.853	16.7399	93.3889	42.5721	0.477411	125.736	36.3544	387.385	136.936	603.007	113.237	867.718	161.128	9002.16	23.0242	113.978	131.215		167.435	23324.6	14.0113	4.0033	13.2025	3.01037	15.6279	6.98504	0.591496	18.3484	11.2807	73.9389	21.2155	66.9773	25.5966	121.826	18.8525	870.453	8.39102	12.002	13.8171		184.034	22744.1	0.966225	2.01602	7.64053
Zr12_L2	2087.29	485133	6.63792	19.7097	72.6835	7.81654	42.7984	21.3462	0.204264	77.6738	21.5858	242.35	81.0494	347.145	60.9962	494.502	93.6848	8758.72	5.15416	71.8709	81.0249		56.4117	9072.2	6.84939	1.80656	2.61941	0.48299	5.21467	1.72041	0.188867	9.00879	3.47632	19.8567	6.71125	27.1373	7.91931	41.2711	4.85456	196.059	1.28923	4.53438	5.11192		415.303	96525.6	1.32073	3.92158	14.4617
Zr01_L3	1130.34	487343	10.1665	0.374795	13.7189	0.104935	2.76615	6.3514	0.106879	32.858	10.6617	121.847	42.2234	182.36	35.9768	294.909	58.3876	8312.71	3.04993	43.8057	53.2175		45.8403	20432.8	2.76487	0.419897	1.38069	0.176861	0.913987	1.03666	0.167765	2.34032	1.43879	10.7486	2.33415	16.7524	3.03949	19.7074	4.12	382.154	1.27381	3.2621	3.96297		475.473	204999	4.2765	0.157656	5.77079
Zr04_L3	1411.13	486892	9.59235	0.25014	14.724	0.299279	5.78721	10.288	0.195133	47.2967	13.7069	154.802	53.4848	230.074	42.6912	348.354	66.552	8285.61	2.24967	57.2793	63.8422		77.7526	6811.9	3.01829	0.239995	1.3544	0.194502	0.95731	0.401823	0.168411	3.65887	1.26347	12.326	2.99591	18.0493	2.65273	29.3626	6.24111	198.877	0.564873	5.94826	6.62981		536.866	185238	3.64942	0.0951659	5.60174
Zr05_L3	1383	486205	23.4547	6.75096	86.9699	2.04988	11.2703	9.12827	0.325191	36.5142	12.3078	145.141	50.5463	227.354	39.7983	329.17	60.4929	8950.25	7.29987	58.7378	68.8737		38.1387	13771.7	9.46151	1.00058	3.52652	0.513605	3.15262	1.26771	0.49107	4.87793	2.30007	12.9637	5.07115	31.3367	4.16678	32.5783	9.66208	432.11	2.6431	7.57529	8.88251		193.322	67964.3	3.27861	0.943684	12.1571
Zr06_L3	1537.95	486148	17.7252	2.0579	25.225	0.693643	4.70957	7.26608	0.103187	38.1078	12.7292	156.895	56.9292	250.355	47.8012	393.556	74.1984	8806.54	3.73732	60.937	73.4475		82.3589	21632.8	3.77454	0.300608	2.15828	0.242642	1.28642	1.27703	0.139876	2.52412	1.36058	15.808	3.91496	13.6974	3.70123	31.1615	3.86511	336.167	0.326593	4.94173	5.95629		561.606	177524	6.47263	0.751472	9.21126
Zr08_L3	1492.73	486295	15.71	8.27149	19.8856	-0.288798	1.80679	8.38175	0.158016	41.9374	13.9204	162.04	59.7668	240.657	47.6491	349.407	69.8219	8694.86	70.2628	54.5143	62.1217		95.4094	15176	8.36598	1.74384	1.66078	0.307459	1.60594	2.14014	0.196959	7.96507	1.56278	37.8898	7.46732	16.3326	4.9629	34.9707	4.85081	533.362	4.18368	5.27304	6.00889		155.947	50803.5	1.64124	0.864128	2.07747
Zr09_L3	2726.43	484473	48.6973	0.00960736	35.9045	-0.0966492	2.1531	9.85339	0.243704	70.3415	24.4798	286.065	100.807	440.181	77.8346	611.692	103.978	8478.06	9.6235	146.452	181.688		115.069	26105.6	4.2243	0.296675	2.06458	0.118073	0.761921	1.40283	0.122298	5.70315	1.21997	25.138	4.72605	30.4342	6.19116	31.6732	6.67889	334.08	1.49915	7.842	9.72874		895.404	159109	15.993	0.00315521	11.7916
Zr10_L3	4143.16	481757	17.3088	3.40771	38.9655	-0.931779	0.775054	15.1235	0.450682	103.665	35.5821	433.854	148.563	642.554	113.767	882.366	159.918	8970.71	37.9527	141.742	172.771		146.312	17712.7	8.45664	2.46749	4.24564	0.97132	3.12382	4.56566	0.397446	5.80342	11.9741	24.7458	21.9241	69.5228	14.3833	36.4419	20.9908	327.249	10.5571	23.2188	28.3016		201.332	23410.4	0.841099	0.165594	1.89348
Zr11_L3	2873.46	483992	17.2451	0.117268	24.7457	-0.220341	3.03064	12.8377	0.156527	77.5321	27.4269	313.681	108.721	472.558	83.1392	648.988	118.863	8756.31	3.63323	112.222	129.935		149.354	34864.5	4.61541	0.194029	1.92337	0.129174	1.43726	2.67194	0.149859	6.81746	2.02759	28.4543	7.17737	24.6116	9.33046	40.7706	7.27761	510.792	0.750701	6.05106	7.0062		712.247	119968	4.27456	0.0290674	6.13375
Zr12_L3	2340.05	485043	11.2902	12.1489	51.6774	4.42486	24.3982	17.8771	0.240666	77.1896	22.6674	257.97	85.2145	367.642	67.7528	538.553	102.364	8544.3	3.14282	73.7156	85.7527		128.01	14548.8	7.90801	0.962199	2.95618	0.407248	5.07154	3.01139	0.264377	8.77208	1.8539	24.2513	5.10179	27.6133	4.24838	29.3252	8.47528	331.515	1.09471	6.44766	7.50051		432.996	89750.9	2.0891	2.24799	9.56221
Zr13_L3	1525.72	486077	13.0285	-0.0154659	16.2571	-0.531013	-0.122105	7.125	0.0552539	45.4492	13.275	159.291	57.0038	258.561	48.9564	388.387	74.6896	8888.89	4.06707	68.6638	89.4441		79.629	23023.1	13.0536	0.4731	2.23393	0.538124	1.93856	1.89873	0.333892	6.40255	1.44148	34.5725	2.54701	23.5033	10.0788	21.3063	7.22466	349.729	1.17763	6.79911	8.85677		190.628	60732.2	1.62783	-0.00193236	2.03122
Zr01_R	1242.05	487218	9.9203	0.690875	15.2233	0.428936	4.28914	7.29805	0.124232	39.1047	12.0655	136.734	47.5308	204.107	38.2687	310.877	60.1221	8250.65	2.62808	45.5933	55.062		43.4365	22620.8	0.579617	0.0536068	0.848384	0.0321295	0.227311	0.343378	0.0493204	1.54452	0.941482	6.19247	1.96794	8.25816	1.92706	15.248	2.10616	329.6	0.415515	2.15795	2.6061		4248.41	1.66652e+06	33.9321	2.36312	52.071
Zr02_R	1206.48	486906	11.1369	0.0387382	13.5673	0.0792794	2.27529	6.18481	0.100354	35.7181	10.9672	127.027	45.497	197.769	37.385	306.408	59.5718	8634.9	2.72072	41.9397	54.3695		51.5757	18771.1	2.11508	0.0456517	0.709091	0.0343066	0.187501	0.298133	0.0577124	1.83813	0.422328	5.20092	3.67434	7.23048	2.01669	9.84942	2.13896	346.278	0.250012	1.72293	2.23356		2011.33	811725	18.5665	0.0645808	22.6182
Zr04_R	2047.09	485992	8.06672	0.081589	14.6222	0.512423	8.37238	15.1603	0.267792	73.4817	21.8957	236.152	80.3616	331.731	59.8807	474.212	88.7682	8124.09	2.29634	66.6497	72.1403		101.897	25793.6	1.64147	0.0347952	0.596081	0.0984853	0.722283	0.938992	0.101047	3.11086	0.930795	13.8414	3.15343	13.4754	2.85028	22.5721	4.17194	312.475	0.315048	2.49797	2.70375		4366.21	1.03656e+06	17.2054	0.17402	31.1874
Zr05_R	2890.15	484521	19.982	7.9285	25.9069	3.55725	20.8062	17.373	0.237193	84.412	27.5167	314.763	110.058	467.791	80.8117	627.973	113.212	8186.13	4.08846	122.369	134.024		98.3492	14078.6	2.74162	0.286885	1.45553	0.266974	1.77519	1.39216	0.083861	4.95982	1.4967	22.4057	10.8524	25.5267	5.83848	28.947	5.818	310.951	1.13654	4.81113	5.2694		2031.24	340529	14.0436	5.57227	18.2078
Zr06_R	2120.74	485402	20.7913	2.90518	25.7738	1.36646	9.19509	11.3837	0.173683	61.5084	20.7756	236.178	82.3799	352.442	63.7066	492.602	89.442	8557.75	4.32254	90.902	111.867		57.5292	13350.6	2.23866	0.172964	1.02605	0.0730743	0.277602	0.412117	0.0550971	1.98284	1.30138	9.39061	4.15872	12.662	1.67072	16.5846	3.67419	269.685	0.36156	3.21328	3.95438		6769.04	1.54932e+06	66.3621	9.27285	82.2656
Zr08_R	2164.06	485743	12.3795	-0.0281685	16.0801	0.227623	5.80267	12.5128	0.219392	67.6521	21.5128	244.208	84.3125	352.08	63.6723	498.428	92.6565	8183.35	3.1361	80.5803	89.056		77.7901	13866.7	1.80164	0.0444958	0.350579	0.146852	0.511543	0.649079	0.0576668	2.39384	1.20008	13.4686	3.27463	13.2851	3.63677	24.5811	4.68801	211.199	0.410724	3.69782	4.08677		2354.18	528416	13.4671	-0.0306431	17.4928
Zr09_R	2184.82	485185	36.2984	3.23629	37.2194	1.56366	9.7622	10.2109	0.1645	58.3092	20.0471	234.722	84.7904	358.606	65.508	504.315	89.2772	8631.68	7.07953	123.147	147.924		65.5894	16594.8	1.86963	0.157273	1.14646	0.0830076	0.417484	0.576417	0.0625329	2.26823	1.1648	11.6472	2.44475	10.8388	3.09255	15.6965	3.82949	269.065	0.853083	3.31098	3.97716		7472.19	1.65936e+06	124.142	11.0683	127.292
Zr10_R	2253.7	485288	25.2279	0.166461	22.5841	0.200797	3.46827	9.42604	0.157717	61.6246	21.3592	246.332	86.6897	370.238	66.8599	518.95	92.9186	8471.4	4.87458	102.077	121.794		64.3715	14930.2	3.15084	0.0650637	0.853929	0.0347989	0.2276	0.496791	0.0510843	3.30111	0.893003	9.91418	2.55531	15.4697	3.06018	21.6498	4.3109	309.575	0.486182	4.65651	5.55597		5349.77	1.15196e+06	59.8853	0.395141	53.6094
Zr11_R	3120.49	483817	28.3795	0.433977	26.8204	0.389135	5.33019	12.7955	0.285346	82.5129	28.4038	336.316	119.381	502.874	91.351	684.279	121.117	8516.92	5.52752	144.941	158.007		97.5491	16778.9	1.3421	0.0463468	0.898284	0.0396169	0.487929	1.0501	0.0766311	4.68635	1.4152	18.6197	4.55988	22.6332	3.99012	30.2685	4.85503	326.612	0.501276	5.71505	6.23023		6799.33	1.0542e+06	61.8369	0.945605	58.4398
Zr12_R	1981.2	485927	14.4825	3.41736	25.5738	1.60496	11.3044	12.3088	0.195319	60.6212	19.4604	217.85	76.1893	325.389	59.405	466.353	87.0441	8280.37	3.251	73.3534	85.4414		45.8293	12610.8	1.27565	0.162979	0.973991	0.0848061	0.45056	0.593518	0.0516203	1.34085	1.85955	10.8284	2.33723	12.5151	2.00217	9.24572	2.38636	246.709	0.441556	2.36211	2.75136		4460.46	1.09401e+06	32.6059	7.69384	57.5768
Zr13_R	1944.1	486208	12.4215	0.165787	16.4582	0.271894	4.83665	10.9533	0.203795	58.2597	19.3442	207.088	73.4775	311.956	56.4834	443.315	84.1564	8113.09	2.83265	79.0604	86.8626		51.1867	11745.6	2.39195	0.0596101	0.847011	0.0324421	0.600404	0.813897	0.0792683	2.46887	1.17403	5.62131	4.41333	11.1827	3.59214	13.8527	2.54398	328.965	0.331923	3.37088	3.70354		3014.81	753983	19.2625	0.257094	25.5225
a[U] calculated from the [Th] determined by ICPMS and the Th/U ratio determined by TIMS.
[truncated: 37 more columns]
