# Supplementary material for: Geochronological and geochemical effects of zircon chemical abrasion: insights from single-crystal stepwise dissolution experiments
Source: Copernicus journal article supplement (doi:10.5194/gchron-6-1-2024), 2024-01-09
Supplement: Supplementary file 1 [file gchron-6-1-2024-supplement.zip › Table_S3.xlsx]

## Sheet: AS3
					α dose (α/g)
Sample	LREE-I	Zircon Dissolved (%)	Pb* (%)	ULeachate/UResidue	Total1	Pb Loss2	Present Day2
180 °C Experiment
Zr10_L1	3.4	38.9893	57.4361	3.55305	6.65e+18	4.39e+18	4.39e+18
Zr11_L1	3.7	36.8513	51.9477	2.16571	4.56e+18	3.017e+18	3.017e+18
Zr14_L1	24.8	15.4792	23.7924	2.82731	3.74e+18	2.473e+18	2.473e+18
Zr17_L1	5.4	6.6616	15.1434	3.2876	3.38e+18	2.229e+18	2.229e+18
Zr18_L1	5.1	–	–	0.919952	2.22e+18	1.469e+18	1.469e+18
Zr23_L1	11.7	21.7424	45.4421	1.85271	4.04e+18	2.674e+18	2.674e+18
Zr24_L1	6.7	84.3905	90.5258	3.27173	7.78e+18	5.143e+18	5.143e+18
Zr28_L1	4.9	11.098	16.7225	–	--	--	--
Zr60_L1	5.3	–	–	–	4.45e+18	2.939e+18	2.939e+18
Zr61_L1	3.8	–	–	–	2.38e+18	1.574e+18	1.574e+18
Zr62_L1	6.9	–	–	–	3.41e+18	2.256e+18	2.256e+18
Zr63_L1	5.4	15.7094	32.981	5.93592	5.97e+19	3.9456e+19	3.9456e+19
Zr64_L1	6.5	43.3773	64.616	1.47943	3.49e+18	2.302e+18	2.302e+18
Zr69_L1	11.3	–	–	–	4.59e+18	3.037e+18	3.037e+18
Zr70_L1	58.1	–	–	–	1.448e+19	9.566e+18	9.566e+18
Zr71_L1	4.4	20.7511	52.8064	1.83289	3.49e+18	2.304e+18	2.304e+18
Zr73_L1	8.5	40.5117	42.8906	4.86779	7.63e+18	5.037e+18	5.037e+18
Zr10_L2	12.4	17.2844	15.7389	4.26602	8.43e+18	5.571e+18	5.571e+18
Zr11_L2	5.5	6.4849	8.5883	1.94568	4.02e+18	2.656e+18	2.656e+18
Zr13_L2	28.6	–	–	1.4673	2.96e+18	1.957e+18	1.957e+18
Zr14_L2	20.9	14.1605	14.743	1.40892	1.85e+18	1.226e+18	1.226e+18
Zr17_L2	53.4	3.9685	6.3164	1.82563	1.93e+18	1.275e+18	1.275e+18
Zr23_L2	16.4	9.9093	7.8221	1.0274	2.21e+18	1.461e+18	1.461e+18
Zr24_L2	9.4	5.7294	4.0742	2.49223	5.85e+18	3.864e+18	3.864e+18
Zr28_L2	18.7	9.2704	13.1026	3.37225	4.29e+18	2.833e+18	2.833e+18
Zr60_L2	9.2	–	–	–	1.117e+19	7.378e+18	7.378e+18
Zr62_L2	9.3	–	–	–	8.44e+18	5.577e+18	5.577e+18
Zr63_L2	10.2	1.3465	5.4324	11.8462	1.1887e+20	7.8554e+19	7.8554e+19
Zr64_L2	13.4	9.6332	7.5977	1.31275	3.14e+18	2.073e+18	2.073e+18
Zr69_L2	23	–	–	–	3.06e+18	2.021e+18	2.021e+18
Zr70_L2	81.3	–	–	–	4.91e+18	3.245e+18	3.245e+18
Zr71_L2	12.4	7.6475	5.0943	1.09451	2.17e+18	1.437e+18	1.437e+18
Zr73_L2	16.3	19.2503	9.6818	2.17092	3.49e+18	2.304e+18	2.304e+18
Zr10_L3	9.5	7.2754	5.6332	1.85758	3.68e+18	2.435e+18	2.435e+18
Zr11_L3	8.6	7.5675	6.1014	0.750937	1.56e+18	1.028e+18	1.028e+18
Zr13_L3	25	–	–	1.02902	2.08e+18	1.375e+18	1.375e+18
Zr14_L3	–	13.7771	13.5262	1.36256	1.79e+18	1.185e+18	1.185e+18
Zr17_L3	–	2.9544	3.8397	1.47653	1.57e+18	1.035e+18	1.035e+18
Zr18_L3	27.2	–	–	1.50396	3.75e+18	2.475e+18	2.475e+18
Zr23_L3	40.6	6.5379	4.5387	1.01294	2.17e+18	1.437e+18	1.437e+18
Zr24_L3	18.2	2.9394	1.7638	1.40352	3.27e+18	2.164e+18	2.164e+18
Zr28_L3	52.8	7.9651	8.1597	1.63557	2.13e+18	1.408e+18	1.408e+18
Zr60_L3	7.5	–	–	–	4.21e+18	2.784e+18	2.784e+18
Zr61_L3	29.7	–	–	–	2.51e+18	1.662e+18	1.662e+18
Zr62_L3	8.2	–	–	–	1.017e+19	6.721e+18	6.721e+18
Zr63_L3	13.9	3.595	3.3957	4.33167	4.377e+19	2.8928e+19	2.8928e+19
Zr64_L3	26.7	6.9982	5.2223	1.39671	3.35e+18	2.215e+18	2.215e+18
Zr69_L3	19.1	–	–	–	3.84e+18	2.538e+18	2.538e+18
Zr70_L3	33.8	–	–	–	4.97e+18	3.282e+18	3.282e+18
Zr71_L3	12.6	6.7992	4.5476	1.32529	2.64e+18	1.743e+18	1.743e+18
Zr73_L3	47.8	19.9602	6.6816	2.15942	3.48e+18	2.302e+18	2.302e+18
Zr10_R	17.1	36.4509	21.1917	–	1.99e+18	1.316e+18	1.316e+18
Zr11_R	22.5	49.0964	33.3625	–	2.08e+18	1.373e+18	1.373e+18
Zr13_R	66.7	–	–	–	2.04e+18	1.348e+18	1.348e+18
Zr14_R	1460.9	56.5832	47.9384	–	1.3e+18	8.58e+17	8.58e+17
Zr17_R	65.5	86.4155	74.7005	–	1.1e+18	7.29e+17	7.29e+17
Zr18_R	28.8	–	–	–	2.49e+18	1.643e+18	1.643e+18
Zr23_R	55.5	61.8104	42.1971	–	2.14e+18	1.415e+18	1.415e+18
Zr24_R	66.2	6.9408	3.6363	–	2.33e+18	1.54e+18	1.54e+18
Zr28_R	75.5	71.6665	62.0151	–	1.32e+18	8.75e+17	8.75e+17
Zr63_R	34.6	79.3491	58.1909	–	1.025e+19	6.775e+18	6.775e+18
Zr64_R	41.2	39.9913	22.5639	–	2.41e+18	1.59e+18	1.59e+18
Zr71_R	36	64.8021	37.5516	–	2e+18	1.323e+18	1.323e+18
Zr73_R	315.9	20.2779	40.7459	–	1.61e+18	1.065e+18	1.065e+18
210 °C Experiment
Zr29_L1	10.4	66.0832	74.139	0.92645	1.96e+18	1.299e+18	1.299e+18
Zr41_L1	13.6	12.2947	31.2738	2.48795	5.02e+18	3.321e+18	3.321e+18
Zr45_L1	20.8	64.2562	77.9422	1.48437	2.76e+18	1.824e+18	1.824e+18
Zr49_L1	31.2	–	–	–	3.5e+18	2.313e+18	2.313e+18
Zr53_L1	15.3	15.1031	17.33	1.06075	1.41e+18	9.33e+17	9.33e+17
Zr54_L1	11	26.2957	29.96	1.3495	1.58e+18	1.048e+18	1.048e+18
Zr58_L1	14.6	42.8838	68.3477	1.36976	2.28e+18	1.505e+18	1.505e+18
Zr29_L2	65.1	16.2453	13.5773	1.33727	2.85e+18	1.881e+18	1.881e+18
Zr41_L2	68.7	25.5643	23.4972	0.468038	9.3e+17	6.15e+17	6.15e+17
Zr45_L2	29.8	23.8386	13.7669	1.40251	2.59e+18	1.711e+18	1.711e+18
Zr53_L2	49.9	12.4927	12.8919	1.08143	1.45e+18	9.57e+17	9.57e+17
Zr54_L2	74.7	17.6402	15.5703	0.76763	9e+17	5.95e+17	5.95e+17
Zr58_L2	53.2	25.5769	17.4242	0.418321	7e+17	4.61e+17	4.61e+17
Zr29_L3	76.4	6.0225	4.3876	1.27388	2.71e+18	1.789e+18	1.789e+18
Zr41_L3	41.8	17.5465	14.39	0.923965	1.83e+18	1.212e+18	1.212e+18
Zr45_L3	71.9	8.5251	4.6648	1.19981	2.22e+18	1.466e+18	1.466e+18
Zr53_L3	125	11.3292	10.7449	0.323816	4.3e+17	2.87e+17	2.87e+17
Zr54_L3	128.9	16.4163	11.1077	1.10582	1.29e+18	8.54e+17	8.54e+17
Zr58_L3	47.8	11.9643	5.888	1.62708	2.73e+18	1.804e+18	1.804e+18
Zr29_R	54.2	11.649	7.8962	–	2.13e+18	1.405e+18	1.405e+18
Zr41_R	41.9	44.5944	30.8391	–	1.99e+18	1.314e+18	1.314e+18
Zr45_R	821.4	3.3802	3.6261	–	1.86e+18	1.231e+18	1.231e+18
Zr53_R	67.2	61.075	59.0362	–	1.34e+18	8.87e+17	8.87e+17
Zr54_R	115.8	39.6478	43.3574	–	1.17e+18	7.75e+17	7.75e+17
Zr58_R	48.3	19.5751	8.3402	–	1.67e+18	1.104e+18	1.104e+18
1Calculated asssuming a damage accumulation interval of 1096.42 Ma
2Calculated asssuming a damage accumulation interval of 750 Ma
Shaded cells mark leachates with Pb loss as plotted in Fig. 11

## Sheet: SAM-47
					α dose (α/g)
Sample	LREE-I	Zircon Dissolved (%)	Pb* (%)	ULeachate/UResidue	Total1	Pb Loss2	Present Day3
180 °C Experiment
Zr21_L1	4.382	11.2773	23.1079	0.876309	3.535e+18	2.4072e+18	5.669e+17
Zr23_L1	4.4583	9.34695	16.5749	0.61277	2.561e+18	1.7505e+18	4.153e+17
Zr30_L1	4.2204	12.7424	23.1168	2.0101	9.162e+18	6.2314e+18	1.4646e+18
Zr35_L1	4.3486	4.47654	8.91955	1.68792	4.769e+18	3.2484e+18	7.654e+17
Zr39_L1	4.4344	9.9912	23.0094	2.72948	1.1206e+19	7.6194e+18	1.7898e+18
Zr43_L1	6.0008	2.84705	4.44458	0.652928	1.985e+18	1.3538e+18	3.197e+17
Zr21_L2	6.1889	6.53454	14.9521	1.64319	6.624e+18	4.5094e+18	1.0617e+18
Zr23_L2	9.0683	3.34361	11.8085	2.35331	9.64e+18	6.576e+18	1.5538e+18
Zr30_L2	11.5311	8.61538	10.5151	0.847532	3.904e+18	2.6585e+18	6.262e+17
Zr35_L2	8.6879	2.64357	7.45316	2.23236	6.277e+18	4.2732e+18	1.0059e+18
Zr39_L2	15.7963	6.21341	11.4893	2.1006	8.723e+18	5.9387e+18	1.3983e+18
Zr43_L2	4.7378	3.67083	4.31489	0.941513	2.859e+18	1.9491e+18	4.602e+17
Zr21_L3	8.677	8.155	11.8173	0.872806	3.521e+18	2.3971e+18	5.645e+17
Zr23_L3	14.625	9.45691	9.3765	0.901205	3.684e+18	2.5125e+18	5.934e+17
Zr30_L3	12.283	7.3874	8.33825	1.06513	4.913e+18	3.3461e+18	7.884e+17
Zr35_L3	13.9175	5.44916	5.84632	1.15014	3.245e+18	2.2097e+18	5.205e+17
Zr39_L3	16.8694	8.26564	8.67763	1.28178	5.343e+18	3.6391e+18	8.575e+17
Zr43_L3	35.9202	3.10554	4.82519	1.21812	3.699e+18	2.5224e+18	5.955e+17
Zr21_R	17.0756	74.0331	50.1227	–	4.034e+18	2.7465e+18	6.468e+17
Zr23_R	17.773	77.8525	62.2401	–	4.077e+18	2.7795e+18	6.561e+17
Zr30_R	19.6302	71.2548	58.0299	–	4.626e+18	3.1519e+18	7.431e+17
Zr35_R	40.298	87.4307	77.781	–	2.84e+18	1.9356e+18	4.566e+17
Zr39_R	28.1213	75.5297	56.8237	–	4.204e+18	2.8658e+18	6.765e+17
Zr43_R	42.762	90.3766	86.4153	–	3.042e+18	2.075e+18	4.901e+17
210 °C Experiment
Zr02_L1	4.9582	59.6244	78.9669	3.31482	1.2081e+19	8.2238e+18	1.9358e+18
Zr08_L1	4.4434	62.9117	72.3081	1.7333	4.596e+18	3.1243e+18	7.336e+17
Zr13_L1	4.2941	66.6388	68.6744	0.713197	3.512e+18	2.3933e+18	5.644e+17
Zr22_L1	5.9025	25.1155	34.786	0.758863	2.479e+18	1.6958e+18	4.026e+17
Zr27_L1	4.5201	45.8396	58.0487	0.585306	2.799e+18	1.9067e+18	4.493e+17
Zr41_L1	5.5695	43.1354	45.6119	1.1442	4.097e+18	2.7907e+18	6.576e+17
Zr02_L2	10.7378	28.1818	15.0089	1.14443	4.226e+18	2.8812e+18	6.8e+17
Zr08_L2	12.2903	1.36488	13.4091	1.81138	4.907e+18	3.3438e+18	7.886e+17
Zr13_L2	9.446	29.0592	23.418	1.37019	6.781e+18	4.6229e+18	1.0913e+18
Zr22_L2	14.973	23.526	22.3518	1.02078	3.274e+18	2.2345e+18	5.286e+17
Zr27_L2	7.3529	23.5237	19.0729	0.861614	4.119e+18	2.8052e+18	6.609e+17
Zr41_L2	15.0173	20.9102	26.7377	0.881829	3.171e+18	2.1607e+18	5.096e+17
Zr02_L3	32.302	7.33435	4.0221	1.21855	4.533e+18	3.0932e+18	7.312e+17
Zr08_L3	23.496	10.7854	5.15314	1.24086	3.379e+18	2.3042e+18	5.44e+17
Zr13_L3	–	1.07787	5.71897	0.356482	1.767e+18	1.205e+18	2.845e+17
Zr22_L3	36.5454	12.523	12.7105	0.851212	2.718e+18	1.8543e+18	4.382e+17
Zr27_L3	14.616	11.9854	9.15525	0.616802	2.954e+18	2.0124e+18	4.743e+17
Zr41_L3	32.8439	16.7402	13.1175	0.801834	2.88e+18	1.9621e+18	4.626e+17
Zr02_R	343.521	4.85947	2.00212	–	3.7e+18	2.5228e+18	5.957e+17
Zr08_R	53.8248	24.9381	9.12962	–	2.706e+18	1.8437e+18	4.347e+17
Zr13_R	30.1117	3.22421	2.18868	–	4.967e+18	3.3878e+18	8.003e+17
Zr22_R	43.252	38.8356	30.1517	–	3.185e+18	2.1721e+18	5.131e+17
Zr27_R	21.8073	18.6513	13.7232	–	4.788e+18	3.2617e+18	7.688e+17
Zr41_R	41.5203	19.2143	14.5329	–	3.589e+18	2.445e+18	5.764e+17
1Calculated asssuming a damage accumulation interval of 3321.75 Ma
2Calculated asssuming a damage accumulation interval of 2570.75 Ma
3Calculated asssuming a damage accumulation interval of 751 Ma
Shaded cells mark leachates with Pb loss as plotted in Fig. 11

## Sheet: KR18-04
					α dose (α/g)
Sample	LREE-I	Zircon Dissolved (%)	Pb* (%)	ULeachate/UResidue	Total1	Pb Loss2	Present Day2
180 °C Experiment
Zr07_L1	10.0768	3.21012	4.10398	19.9703	5.042e+18	1.9163e+18	1.9163e+18
Zr15_L1	11.073	0.969251	6.6191	50.6898	1.1186e+19	4.2564e+18	4.2564e+18
Zr23_L1	9.0989	1.31925	4.02988	9.44143	2.121e+18	8.08e+17	8.08e+17
Zr31_L1	20.592	5.38983	4.70719	1.97124	2.029e+18	7.727e+17	7.727e+17
Zr33_L1	12.593	–	–	28.0721	6.302e+18	2.4047e+18	2.4047e+18
Zr07_L2	24.4967	2.94429	2.15218	0.737591	2.25e+17	8.61e+16	8.61e+16
Zr15_L2	7.5342	0.684592	1.40843	6.37922	1.347e+18	5.12e+17	5.12e+17
Zr19_L2	36.1375	–	–	0.871982	7.16e+17	2.724e+17	2.724e+17
Zr23_L2	21.8435	1.0212	1.63306	1.331	3e+17	1.144e+17	1.144e+17
Zr31_L2	93.173	6.44498	4.03592	0.726777	7.51e+17	2.859e+17	2.859e+17
Zr07_L3	50.2032	3.60314	1.3806	0.94776	2.46e+17	9.36e+16	9.36e+16
Zr15_L3	17.7786	0.733815	2.6076	2.21578	4.96e+17	1.889e+17	1.889e+17
Zr19_L3	96.2366	–	–	0.855994	7.04e+17	2.679e+17	2.679e+17
Zr23_L3	17.893	1.1412	0.577362	1.42107	3e+17	1.139e+17	1.139e+17
Zr31_L3	80.238	5.85023	3.70859	0.766235	7.87e+17	2.998e+17	2.998e+17
Zr33_L3	15.9117	–	–	0.285597	9.6e+16	3.71e+16	3.71e+16
Zr07_R	64.5814	90.2424	92.3632	–	2.58e+17	9.81e+16	9.81e+16
Zr15_R	55.3155	97.6123	89.3649	–	2.18e+17	8.28e+16	8.28e+16
Zr19_R	83.2725	–	–	–	8.26e+17	3.143e+17	3.143e+17
Zr23_R	28.4718	96.5183	93.7597	–	2.14e+17	8.13e+16	8.13e+16
Zr31_R	95.5878	82.315	87.5483	–	1.018e+18	3.877e+17	3.877e+17
Zr33_R	57.5682	–	–	–	2.01e+17	7.65e+16	7.65e+16
210 °C Experiment
Zr01_L1	7.185	4.72777	11.2861	5.44439	9.37e+17	3.563e+17	3.563e+17
Zr02_L1	8.7129	–	–	11.9018	2.004e+18	7.622e+17	7.622e+17
Zr03_L1	9.7546	–	–	–	1.205e+18	4.597e+17	4.597e+17
Zr04_L1	8.8279	5.9703	13.0052	11.4693	2.654e+18	1.0104e+18	1.0104e+18
Zr05_L1	9.8339	6.07703	9.55473	6.15586	2.639e+18	1.0045e+18	1.0045e+18
Zr06_L1	9.5508	5.59424	8.61906	3.56847	1.297e+18	4.941e+17	4.941e+17
Zr08_L1	8.9269	3.18833	8.7974	7.91623	2.32e+18	8.839e+17	8.839e+17
Zr09_L1	9.2853	4.99342	9.35156	8.2111	3.817e+18	1.452e+18	1.452e+18
Zr10_L1	16.7937	3.03283	8.12805	2.46267	9.48e+17	3.609e+17	3.609e+17
Zr11_L1	3.0113	2.8717	9.84953	10.5515	5.359e+18	2.04e+18	2.04e+18
Zr12_L1	10.5975	4.43951	7.79111	5.76275	1.596e+18	6.079e+17	6.079e+17
Zr13_L1	11.1176	–	–	5.00359	1.658e+18	6.341e+17	6.341e+17
Zr01_L2	39.5536	5.87289	6.72431	1.23634	2.12e+17	8.07e+16	8.07e+16
Zr02_L2	54.1915	–	–	1.18836	2.01e+17	7.65e+16	7.65e+16
Zr03_L2	45.6055	–	–	–	2.64e+17	1.005e+17	1.005e+17
Zr04_L2	33.5348	7.70802	7.64379	1.25925	2.84e+17	1.082e+17	1.082e+17
Zr05_L2	27.6364	9.08252	8.92716	0.846424	3.54e+17	1.347e+17	1.347e+17
Zr06_L2	32.7841	6.16052	6.12113	0.846688	2.96e+17	1.125e+17	1.125e+17
Zr08_L2	121.37	6.18848	4.98454	0.745129	2.08e+17	7.91e+16	7.91e+16
Zr09_L2	195.257	3.5841	9.55645	1.71406	7.9e+17	3.005e+17	3.005e+17
Zr10_L2	378.509	3.73186	8.77321	1.30981	5.01e+17	1.907e+17	1.907e+17
Zr11_L2	13.2476	1.84566	8.8035	0.830438	4.12e+17	1.569e+17	1.569e+17
Zr12_L2	17.0159	7.20464	7.18564	0.94831	2.56e+17	9.72e+16	9.72e+16
Zr01_L3	63.2339	9.79246	10.4497	0.966502	1.66e+17	6.31e+16	6.31e+16
Zr04_L3	41.796	13.0873	12.4654	0.884973	2.02e+17	7.68e+16	7.68e+16
Zr05_L3	28.7783	14.1156	13.7739	0.513889	2.16e+17	8.21e+16	8.21e+16
Zr06_L3	54.9069	9.07185	8.65735	0.65656	2.29e+17	8.72e+16	8.72e+16
Zr08_L3	109.017	7.94859	6.84801	0.697558	1.96e+17	7.44e+16	7.44e+16
Zr09_L3	161.894	7.99912	9.60765	1.22825	5.64e+17	2.146e+17	2.146e+17
Zr10_L3	588.46	1.85701	9.24439	1.41855	5.38e+17	2.047e+17	2.047e+17
Zr11_L3	127.938	9.73523	9.60188	0.822342	4.08e+17	1.552e+17	1.552e+17
Zr12_L3	25.0035	6.69898	8.13733	1.00364	2.69e+17	1.024e+17	1.024e+17
Zr13_L3	–	–	–	1.02972	2.76e+17	1.049e+17	1.049e+17
Zr01_R	50.6146	79.6069	71.5399	–	1.72e+17	6.53e+16	6.53e+16
Zr02_R	76.3676	–	–	–	1.68e+17	6.38e+16	6.38e+16
Zr04_R	43.7832	73.2344	66.8856	–	2.29e+17	8.72e+16	8.72e+16
Zr05_R	33.2462	70.7248	67.7442	–	4.25e+17	1.616e+17	1.616e+17
Zr06_R	46.4323	79.1734	76.6025	–	3.48e+17	1.323e+17	1.323e+17
Zr08_R	61.6021	82.6746	79.3701	–	2.82e+17	1.072e+17	1.072e+17
Zr09_R	47.0315	83.4234	71.4843	–	4.62e+17	1.756e+17	1.756e+17
Zr10_R	97.1577	91.3783	73.8544	–	3.81e+17	1.448e+17	1.448e+17
Zr11_R	89.3803	85.5474	71.7451	–	5.01e+17	1.907e+17	1.907e+17
Zr12_R	36.9698	81.6569	76.8859	–	2.68e+17	1.02e+17	1.02e+17
Zr13_R	61.7227	–	–	–	2.75e+17	1.047e+17	1.047e+17
1Calculated asssuming a damage accumulation interval of 752.49 Ma
2Calculated asssuming a damage accumulation interval of 298 Ma
Shaded cells mark leachates with Pb loss as plotted in Fig. 11
